# Supplementary material for: Identification of the Myogenetic Oligodeoxynucleotides (myoDNs) That Promote Differentiation of Skeletal Muscle Myoblasts by Targeting Nucleolin
Source: Front Cell Dev Biol. 2021 Jan 11;8:616706. doi: 10.3389/fcell.2020.616706 (PMC7874222; doi:10.3389/fcell.2020.616706)
Supplement: Supplementary file 2 [file Data_Sheet_2.XLSX]

## Sheet: 899 DEGs
Gene ID	Gene	Control-A	Control-B	Control-C	iSN04-A	iSN04-B	iSN04-C	Control-Av	iSN04-Av	Fold	FDR p-val	Padj	Product
ENSG00000179772	FOXS1	0	0	0	0.40397	0.550057	0.173153	0	0.375727	#DIV/0!	3.8832e-05	0.0035295	Fork head domain||Fork head domain conserved site1
ENSG00000279342	AP000866.1	0.207049	0.600466	0.212279	0	0	0	0.339931	0	#DIV/0!	0.0038822	0.11581	-
ENSG00000260633	--	0	0	0	0.0821434	0.114717	0.211254	0	0.136038	#DIV/0!	0.0039025	0.11612	--
ENSG00000035720	STAP1	0.257371	0.149281	0.0879569	0	0	0	0.164869	0	#DIV/0!	0.012441	0.25621	SH2 domain||Pleckstrin homology domain
ENSG00000250031	--	0.0480671	0.1394	0.16427	0	0	0	0.117246	0	#DIV/0!	0.020842	0.35606	--
ENSG00000275908	--	1.80024	2.08836	2.46094	0	0	0	2.11651	0	#DIV/0!	0.022146	0.36976	--
ENSG00000243642	--	0	0	0	0.5011	0.174952	1.00234	0	0.559462	#DIV/0!	0.026076	0.4106	--
ENSG00000267649	--	0	0	0	0.331779	0	0.341304	0	0.224361	#DIV/0!	0.029679	0.4433	--
ENSG00000221299	--	0	0	0	1.79608	1.88122	2.05294	0	1.91008	#DIV/0!	0.035143	0.48923	--
ENSG00000152583	SPARCL1	0	0	0	0.163072	0.0854011	0.139794	0	0.129422	#DIV/0!	0.035415	0.49089	SPARC-like protein 1||Follistatin-like, N-terminal||Follistatin/Osteonectin EGF domain||Osteonectin-like, conserved site||EF-hand domain||SPARC/Testican, calcium-binding domain||-||EF-Hand 1, calcium-binding site||Kazal domain
ENSG00000269600	--	0	0	0	0.226739	0.158325	0.323956	0	0.23634	#DIV/0!	0.03624	0.49688	--
ENSG00000265222	--	0	0	0	0.229919	0.240818	0.0492749	0	0.173337	#DIV/0!	0.047959	0.58329	--
ENSG00000268199	--	0	0.0828021	0	0.622681	0.74537	0.686312	0.0276007	0.684787	24.8105	0.00090297	0.039767	--
ENSG00000042062	FAM65C	0	0.0209542	0	0.112555	0.0943128	0.192978	0.00698472	0.133282	19.0819	0.0053148	0.14422	-
ENSG00000236305	--	0.115869	0	0	0.577601	1.05872	0.247576	0.038623	0.627965	16.2588	0.034777	0.48774	--
ENSG00000278212	--	0	0.0392083	0	0.29485	0.0882365	0.144436	0.0130694	0.175841	13.4544	0.036397	0.49844	--
ENSG00000231768	--	0	0.0270586	0	0.116276	0.121789	0.0996789	0.00901955	0.112581	12.4819	0.049999	0.59543	--
ENSG00000235636	--	0	0.112468	0	0.483299	0.569486	0.258945	0.0374894	0.437243	11.6631	0.0048146	0.13481	--
ENSG00000171722	C1orf111	0.0867256	0	0	0.270201	0.396214	0.324285	0.0289085	0.330233	11.4234	0.013129	0.26509	-
ENSG00000230071	--	0	0	0.0448216	0.0817234	0.256793	0.140116	0.0149405	0.159544	10.6786	0.048802	0.58903	--
ENSG00000227094	--	0.248099	0	0	0.618379	0.755642	1.14857	0.0826996	0.840865	10.1677	0.0038205	0.11528	--
ENSG00000233535	--	0.184292	0.0712622	0	0.306228	0.882048	0.918807	0.0851847	0.702361	8.24516	0.0032941	0.1038	--
ENSG00000115896	PLCL1	0.0230241	0.0667723	0.015737	0.258241	0.420751	0.172184	0.0351778	0.283725	8.06545	0.00029246	0.017318	Phosphoinositide-specific phospholipase C, EF-hand-like domain||C2 domain||Phospholipase C, phosphatidylinositol-specific, Y domain||Phosphoinositide phospholipase C family||Pleckstrin homology domain||Phosphatidylinositol-specific phospholipase C, X domain||PLC-like phosphodiesterase, TIM beta/alpha-barrel domain||-
ENSG00000086991	NOX4	0.0470619	0.0545938	0.0643339	0.645152	0.245722	0.377087	0.0553299	0.422654	7.6388	0.00058212	0.028536	Ferric reductase transmembrane component-like domain||FAD-binding 8||Ferric reductase, NAD binding domain||Ferredoxin reductase-type FAD-binding domain||Cytochrome b245, heavy chain||-||Riboflavin synthase-like beta-barrel
ENSG00000225826	--	0.134311	0.0519356	0	0.446355	0.409076	0.478302	0.0620822	0.444578	7.16111	0.0097595	0.22059	--
ENSG00000144648	ACKR2	0.0991245	0	0	0.16471	0.345036	0.176499	0.0330415	0.228748	6.92306	0.04538	0.56565	GPCR, rhodopsin-like, 7TM||CXC chemokine receptor 4||Chemokine receptor family||G protein-coupled receptor, rhodopsin-like
ENSG00000124019	FAM124B	0.0179797	0.0208572	0.0245784	0.224069	0.164284	0.038417	0.0211384	0.142257	6.72977	0.02731	0.42001	FAM124
ENSG00000002745	WNT16	0	0	0.053401	0.0486831	0.127477	0.166936	0.0178003	0.114365	6.42491	0.04297	0.54771	Wnt||Wnt-16 protein||Wnt protein, conserved site
ENSG00000230870	--	0.0290066	0.0336489	0.0396522	0.325341	0.265039	0.0619781	0.0341026	0.217453	6.37643	0.032541	0.46827	--
ENSG00000133135	RNF128	0.0813233	0	0.0555847	0.202696	0.185767	0.477847	0.045636	0.28877	6.32768	0.0058347	0.15439	PA domain||Zinc finger, RING-type
ENSG00000165269	AQP7	0.126997	0.0491074	0	0.474805	0.221028	0.40703	0.0587015	0.367621	6.26255	0.021959	0.36765	Major intrinsic protein||Aquaporin-like||-
ENSG00000168329	CX3CR1	0.0183422	0.0425555	0	0.0457174	0.215481	0.117575	0.0202993	0.126258	6.21982	0.044877	0.56172	G protein-coupled receptor, rhodopsin-like||GPCR, rhodopsin-like, 7TM||CX3C chemokine receptor 1
ENSG00000259985	--	0.0365746	0.0848563	0	0.410225	0.0954826	0.234446	0.040477	0.246718	6.09527	0.046034	0.57108	--
ENSG00000196091	MYBPC1	0.18641	0.275219	0.208492	1.28827	1.59266	1.12248	0.223374	1.33447	5.97416	2.4174e-13	2.7803e-10	Immunoglobulin-like domain||Immunoglobulin I-set||Fibronectin type III||Immunoglobulin subtype||Immunoglobulin subtype 2
ENSG00000159387	IRX6	0	0.0997456	0	0.160735	0.224473	0.206687	0.0332485	0.197298	5.93405	0.016111	0.30197	Homeodomain-like||Homeobox domain||Homeobox, conserved site||Homeobox KN domain||Iroquois-class homeodomain protein
ENSG00000080644	CHRNA3	0.0708462	0.123277	0.0968473	0.838765	0.369906	0.454129	0.0969902	0.554267	5.71467	0.0013871	0.055017	-||Neurotransmitter-gated ion-channel||Neurotransmitter-gated ion-channel, conserved site||Neurotransmitter-gated ion-channel transmembrane domain||Neurotransmitter-gated ion-channel ligand-binding domain||Nicotinic acetylcholine receptor
ENSG00000234362	--	0.0606464	0.211057	0.248712	1.13369	0.712463	1.03666	0.173472	0.960939	5.53945	0.0010899	0.045776	--
ENSG00000176387	HSD11B2	0.374639	0.380273	0.19205	1.51739	2.26172	1.35082	0.315654	1.70998	5.41725	2.0592e-06	0.00034593	-||Glucose/ribitol dehydrogenase||Short-chain dehydrogenase/reductase, conserved site||Short-chain dehydrogenase/reductase SDR
ENSG00000236409	--	0	0.287111	0	0.308444	0.646131	0.594936	0.0957038	0.516504	5.3969	0.02747	0.4206	--
ENSG00000214694	ARHGEF33	0.0846089	0.0654334	0.0385537	0.246033	0.29451	0.451958	0.0628653	0.330833	5.26257	0.0084404	0.19952	-||Dbl homology (DH) domain
ENSG00000112394	SLC16A10	0.0478609	0	0.0218087	0.159056	0.0832979	0.119308	0.0232232	0.120554	5.19109	0.046641	0.57509	Major facilitator superfamily domain||Major facilitator superfamily
ENSG00000127530	OR7C1	0.160434	0.279166	0.274143	0.74977	1.93711	0.942695	0.237914	1.20986	5.08526	0.0049048	0.13656	Olfactory receptor||G protein-coupled receptor, rhodopsin-like||GPCR, rhodopsin-like, 7TM
ENSG00000167178	ISLR2	0.0222918	0.0775784	0.0304731	0.33337	0.232782	0.0952614	0.0434478	0.220471	5.0744	0.020438	0.35104	Immunoglobulin-like domain||Leucine-rich repeat||-||Cysteine-rich flanking region, C-terminal||Leucine-rich repeat, typical subtype
ENSG00000171303	KCNK3	0	0.0488775	0.0143994	0.0787637	0.137496	0.101281	0.0210923	0.105847	5.01827	0.016333	0.30449	Potassium channel domain||Two pore domain potassium channel, TASK family||Two pore domain potassium channel||Potassium channel subfamily K member 3
ENSG00000268879	--	0.118766	0.275547	0.162354	1.33209	0.310053	1.14195	0.185556	0.92803	5.00136	0.036394	0.49844	--
ENSG00000198732	SMOC1	0.145527	0.10129	0.0397872	0.471537	0.417907	0.497512	0.0955347	0.462319	4.83928	0.003275	0.10352	Thyroglobulin type-1||SPARC/Testican, calcium-binding domain||EF-Hand 1, calcium-binding site||Kazal domain
ENSG00000223838	--	0.15108	0.262889	0.309792	1.50625	0.887432	0.968435	0.241254	1.12071	4.64534	0.0038883	0.11581	--
ENSG00000188269	OR7A5	0.961438	0.656065	0.541179	3.73549	2.95289	3.02102	0.719561	3.23647	4.49784	3.4273e-08	1.114e-05	Olfactory receptor||G protein-coupled receptor, rhodopsin-like||GPCR, rhodopsin-like, 7TM
ENSG00000159618	ADGRG5	0.0778438	0.428935	0.106413	1.04288	1.16852	0.540566	0.204397	0.917321	4.48793	0.00071289	0.033257	GPCR, family 2, orphan receptor, GPR56/AGRG5||GPCR, family 2, secretin-like||GPCR, family 2-like||GPS motif||-
ENSG00000180176	TH	0.0740359	0.128827	0.0506038	0.322931	0.4832	0.316383	0.084489	0.374172	4.42864	0.026829	0.41784	Aromatic amino acid hydroxylase, iron/copper binding site||-||Tyrosine 3-monooxygenase-like||Tyrosine 3-monooxygenase||Aromatic amino acid hydroxylase, C-terminal||Tyrosine hydroxylase, conserved site
ENSG00000261819	--	0.0899174	0.052154	0	0.112058	0.322768	0.192126	0.0473571	0.208984	4.41294	0.043794	0.55349	--
ENSG00000224568	--	0.121007	0.140373	0.165417	0.502676	0.94771	0.430923	0.142266	0.627103	4.40797	0.0047717	0.1342	--
ENSG00000133134	BEX2	0.202394	0.704357	0.138337	1.38727	1.32094	1.89198	0.348363	1.5334	4.40172	4.6437e-05	0.0041142	Transcription elongation factor A-like/Brain expressed X-linked-like||Brain-expressed X-linked protein
ENSG00000215853	RPTN	0.0239595	0	0.0491292	0.0895775	0.0781866	0.153582	0.0243629	0.107115	4.39666	0.028307	0.42946	S100/Calbindin-D9k, conserved site||EF-Hand 1, calcium-binding site||S100/CaBP-9k-type, calcium binding, subdomain||EF-hand domain
ENSG00000142621	FHAD1	0.0957039	0.194286	0.0654139	0.56653	0.655849	0.332295	0.118468	0.518225	4.37439	0.00093766	0.040993	Forkhead-associated (FHA) domain||-||SMAD/FHA domain
ENSG00000197934	--	0.0223034	0.0776189	0.0609779	0.389135	0.087339	0.21445	0.0536334	0.230308	4.29411	0.040466	0.53008	--
ENSG00000155792	DEPTOR	0.22637	0.1313	0.348131	0.987388	1.03419	0.937137	0.235267	0.98624	4.192	1.782e-05	0.0018829	PDZ domain||DEP domain
ENSG00000245848	CEBPA	0.0325015	0.113109	0	0.162018	0.254548	0.190975	0.048537	0.202514	4.17236	0.016175	0.30249	CCAAT/enhancer-binding protein, chordates||Basic-leucine zipper domain
ENSG00000187955	COL14A1	1.74795	1.69218	0.962662	8.27464	6.23754	3.74827	1.4676	6.08682	4.14746	0.00025312	0.015415	Concanavalin A-like lectin/glucanase domain||Fibronectin type III||Laminin G domain||von Willebrand factor, type A||-||Collagen triple helix repeat
ENSG00000179761	PIPOX	1.16079	0.89771	0.74051	5.49714	2.77785	3.30699	0.933003	3.86066	4.13789	0.00020365	0.01304	Sarcosine oxidase, monomeric||FAD dependent oxidoreductase
ENSG00000258676	--	0.178595	0.0828713	0.146485	0.667715	0.466246	0.534244	0.135984	0.556068	4.08923	0.0062853	0.16216	--
ENSG00000281852	--	0.0311858	0.0361769	0.0568416	0.194324	0.244243	0.0666344	0.0414014	0.168401	4.06751	0.016587	0.30827	--
ENSG00000170290	SLN	1.30504	1.73018	0.67962	5.03407	5.43495	4.58106	1.23828	5.01669	4.05133	6.4765e-10	3.7974e-07	Sarcolipin
ENSG00000278934	--	0.0664528	0.0616705	0.0181683	0.248447	0.242877	0.0993923	0.0487638	0.196905	4.03794	0.011705	0.24581	--
ENSG00000180720	CHRM4	0.198074	0.0328249	0	0.282111	0.406291	0.241842	0.0769664	0.310081	4.02879	0.039851	0.52519	Muscarinic acetylcholine receptor M4||GPCR, rhodopsin-like, 7TM||Muscarinic acetylcholine receptor family||G protein-coupled receptor, rhodopsin-like
ENSG00000227877	MRLN	1.76616	2.56102	1.60957	6.69485	10.3742	6.83988	1.97892	7.96966	4.02729	4.692e-07	9.9506e-05	-
ENSG00000200033	--	2.46668	0.476909	1.68598	5.12343	6.43957	7.02736	1.54319	6.19679	4.01557	0.0079915	0.19194	--
ENSG00000262663	--	0.254498	0.393639	0.115967	1.05722	0.6644	1.26883	0.254701	0.996815	3.91366	0.021053	0.35826	--
ENSG00000111452	ADGRD1	0.180743	0.256263	0.301983	0.926019	1.15342	0.793838	0.246329	0.957758	3.88812	1.5943e-06	0.00027958	GPCR, family 2, secretin-like, conserved site||-||GPS motif||Concanavalin A-like lectin/glucanase domain||GPCR, family 2, secretin-like||GPCR, family 2-like
ENSG00000186439	TRDN	0.0736744	0.284885	0.0671423	0.336657	0.737289	0.577204	0.141901	0.550384	3.87866	0.0019952	0.070485	-||Aspartyl beta-hydroxylase/Triadin domain
ENSG00000124216	SNAI1	0.177515	0.0588357	0	0.284432	0.430323	0.189647	0.0787835	0.301467	3.82653	0.036961	0.50284	Zinc finger, C2H2||Zinc finger, C2H2-like
ENSG00000186628	FSD2	0.0136775	0.0634658	0.0373943	0.102272	0.124973	0.204571	0.0381792	0.143939	3.77009	0.027002	0.41836	Fibronectin type III||Concanavalin A-like lectin/glucanase domain||Butyrophylin-like||SPRY domain||B30.2/SPRY domain||-
ENSG00000233818	--	0.438842	0.14545	0.1714	1.0938	0.572826	1.1386	0.251897	0.935074	3.71213	0.012171	0.25221	--
ENSG00000111432	FZD10	0.143301	0.120898	0.124659	0.73058	0.306086	0.403613	0.129619	0.480093	3.70387	0.0044139	0.1274	GPCR, family 2-like||Frizzled protein||Frizzled domain||-
ENSG00000171819	ANGPTL7	0.270416	0.0697097	0.24644	1.04845	0.666734	0.449396	0.195522	0.721526	3.69026	0.0042474	0.12343	Fibrinogen, alpha/beta/gamma chain, C-terminal globular domain
ENSG00000129170	CSRP3	0.825164	1.06358	0.543113	2.81844	4.2685	1.79577	0.810621	2.9609	3.65263	0.0027846	0.091204	Zinc finger, LIM-type
ENSG00000078814	MYH7B	2.16938	2.44328	1.00771	7.40197	8.16525	4.63529	1.87346	6.73417	3.59452	1.9714e-05	0.0020361	IQ motif, EF-hand binding site||Myosin tail||Myosin head, motor domain||P-loop containing nucleoside triphosphate hydrolase||Myosin, N-terminal, SH3-like
ENSG00000128313	APOL5	0.267595	0.482878	0.365804	1.25984	2.09577	0.603532	0.372092	1.31971	3.54673	0.026733	0.41705	Apolipoprotein L
ENSG00000261434	--	0.606464	0.615584	0.829041	1.98397	2.57278	2.67264	0.683696	2.4098	3.52466	0.00018138	0.011922	--
ENSG00000127743	IL17B	0.571028	0.910824	0.3903	2.84654	2.98148	0.686312	0.62405	2.17144	3.4796	0.044117	0.55688	Cystine-knot cytokine||Interleukin-17, chordata||Interleukin-17 family
ENSG00000183111	ARHGEF37	1.25004	1.25348	1.15852	5.33365	3.89948	3.14629	1.22068	4.12647	3.38047	2.5546e-06	0.00040419	SH3 domain||Variant SH3 domain||Dbl homology (DH) domain||BAR domain
ENSG00000223802	CERS1	0.216704	0.150832	0.0888708	0.594141	0.650593	0.277818	0.152136	0.507517	3.33596	0.0052491	0.14295	Inhibin, alpha subunit||Transforming growth factor-beta, C-terminal||Transforming growth factor beta, conserved site||Cystine-knot cytokine||Transforming growth factor-beta, N-terminal||Ceramide synthase component Lag1/Lac1||TRAM/LAG1/CLN8 homology domain
ENSG00000144771	LRTM1	0.0935574	0.144707	0.0852624	0.505243	0.366365	0.199903	0.107842	0.35717	3.31196	0.044335	0.55866	Leucine-rich repeat||Cysteine-rich flanking region, C-terminal||Leucine-rich repeat, typical subtype
ENSG00000144644	GADL1	0.014214	0.0659554	0.0582919	0.0885699	0.111322	0.258153	0.0461538	0.152682	3.30811	0.037199	0.50481	Pyridoxal-phosphate binding site||Pyridoxal phosphate-dependent decarboxylase||Pyridoxal phosphate-dependent transferase
ENSG00000280237	--	0.057957	0.0384187	0.0339547	0.196048	0.162112	0.0707635	0.0434435	0.142974	3.29104	0.014203	0.27685	--
ENSG00000068976	PYGM	0.561291	0.396335	0.200162	0.942805	2.03871	0.808227	0.385929	1.26325	3.27326	0.034253	0.48429	Glycosyl transferase, family 35||Glycogen/starch/alpha-glucan phosphorylase
ENSG00000258602	--	0.735899	0.426837	0.402391	2.29276	1.53693	1.25791	0.521709	1.69586	3.25059	0.0040885	0.11976	--
ENSG00000086967	MYBPC2	2.9142	2.29486	0.959584	9.7024	6.85819	3.31789	2.05621	6.62616	3.22251	0.018811	0.33344	Immunoglobulin subtype 2||Fibronectin type III||Immunoglobulin subtype||Immunoglobulin-like domain||Immunoglobulin I-set
ENSG00000144331	ZNF385B	0	0.221917	0.0871698	0.397343	0.291325	0.306563	0.103029	0.331744	3.21991	0.047808	0.58256	-||Zinc finger, C2H2||Zinc finger, U1-type||Zinc finger, C2H2-like
ENSG00000254966	--	0.0489196	0.283744	0.334367	0.609653	0.893975	0.627156	0.222344	0.710261	3.19443	0.016898	0.31153	--
ENSG00000258675	--	0.134241	0.31145	0.458771	0.836478	1.3142	0.717078	0.301487	0.955918	3.17067	0.020643	0.35346	--
ENSG00000181322	NME9	0.403737	0.515187	0.165573	1.40882	0.895905	1.12146	0.361499	1.14206	3.15924	0.0014868	0.058042	-||Nucleoside diphosphate kinase||Thioredoxin domain||Thioredoxin, conserved site||Thioredoxin-like fold
ENSG00000189134	NKAPL	0.130432	0.0605229	0.249623	0.325099	0.749122	0.306563	0.146859	0.460261	3.13403	0.040911	0.53212	Protein of unknown function DUF926
ENSG00000164440	TXLNB	1.31122	0.962704	0.726054	3.41297	3.4881	2.50022	0.999992	3.13376	3.13379	5.3211e-09	2.2731e-06	Taxilin family
ENSG00000180999	C1orf105	1.28782	0.821662	1.05628	2.88887	3.69823	3.23322	1.05525	3.27344	3.10204	2.0612e-05	0.0021036	-||Protein of unknown function DUF4548
ENSG00000160224	AIRE	1.12321	1.08937	1.15787	4.47473	3.10053	2.81306	1.12349	3.46277	3.08217	2.1309e-06	0.00035422	Homogeneously-staining region||Zinc finger, PHD-type, conserved site||Zinc finger, PHD-type||Zinc finger, PHD-finger||SAND domain-like||Autoimmune regulator, AIRE||Zinc finger, FYVE/PHD-type||SAND domain
ENSG00000101695	RNF125	0.0513891	0.0298068	0.210748	0.416279	0.234776	0.247056	0.0973145	0.29937	3.07631	0.035788	0.49229	Drought induced 19 protein type, zinc-binding domain||Zinc finger, RING-type, conserved site||-||Zinc finger, RING-type
ENSG00000197893	NRAP	0.092964	0.062908	0.0635413	0.154473	0.252807	0.264847	0.0731378	0.224042	3.06329	0.0014134	0.055602	Nebulin||Nebulin repeat||Zinc finger, LIM-type
ENSG00000259278	--	0.223462	0.345634	0.305474	1.11394	0.680605	0.875359	0.291523	0.889969	3.05282	0.042313	0.54188	--
ENSG00000268621	--	0.709638	1.33772	0.970081	3.7586	2.31575	3.12732	1.00581	3.06722	3.0495	0.00036404	0.02013	--
ENSG00000196666	FAM180B	0.338842	0.214403	0.126327	0.767776	0.643338	0.658182	0.226524	0.689766	3.045	0.0068948	0.17282	FAM180 family
ENSG00000186051	TAL2	0.391058	0.30243	0.178193	0.649801	1.10598	0.83557	0.29056	0.863785	2.97282	0.044485	0.55916	Myc-type, basic helix-loop-helix (bHLH) domain
ENSG00000122877	EGR2	0.748179	0.338701	0.698475	2.22868	1.50064	1.55964	0.595118	1.76299	2.96241	5.1562e-06	0.00070405	Zinc finger, C2H2||Zinc finger, C2H2-like||Protein of unknown function DUF3446
ENSG00000177283	FZD8	0.0954842	0.172302	0.0580123	0.330544	0.443153	0.181351	0.1086	0.318349	2.9314	0.014308	0.27792	GPCR, family 2-like||Frizzled domain||Frizzled protein
ENSG00000250041	--	0.6924	0.803214	1.77472	3.55943	3.1633	2.68149	1.09011	3.13474	2.87562	0.00036687	0.020241	--
ENSG00000072954	TMEM38A	11.6032	12.5732	8.86255	32.1939	35.239	27.5275	11.013	31.6535	2.8742	1.1878e-15	2.7322e-12	TRIC channel
ENSG00000185028	LRRC14B	0.761068	0.81981	0.780289	1.99856	2.48358	2.26502	0.787056	2.24905	2.85755	2.8141e-07	6.4236e-05	-
ENSG00000161381	PLXDC1	0.406368	0.269374	0.317433	0.904339	0.909321	1.02333	0.331058	0.945664	2.85649	0.0012251	0.049909	Plexin repeat||-
ENSG00000269404	SPIB	0.298782	0.10398	0.32675	0.893646	0.780008	0.383043	0.243171	0.685566	2.81928	0.010404	0.22943	Ets domain||-
ENSG00000130208	APOC1	1.20048	0.964117	0.504945	2.30167	2.65186	2.56506	0.889849	2.5062	2.81643	0.0045353	0.12949	-||Apolipoprotein C-I
ENSG00000197880	MDS2	0.833677	0.18421	0.217075	1.08843	0.98457	1.3996	0.411654	1.15753	2.81191	0.0038355	0.11561	-
ENSG00000006606	CCL26	0.208564	0.564536	0.380145	0.866401	1.27046	1.03982	0.384415	1.05889	2.75456	0.030945	0.45331	Chemokine interleukin-8-like domain||CC chemokine, conserved site
ENSG00000083067	TRPM3	0.0588922	0.0113862	0.0939237	0.146787	0.17937	0.125834	0.054734	0.150664	2.75265	0.030661	0.45143	-||Ion transport domain
ENSG00000070031	SCT	1.40183	1.49066	1.11785	2.91168	3.35467	4.74251	1.33678	3.66962	2.74512	0.001767	0.065446	Glucagon/GIP/secretin/VIP
ENSG00000211651	IGLV1-44	1.00709	1.16827	0.25031	2.62425	2.62915	1.36936	0.808559	2.20758	2.73027	0.01183	0.24721	-
ENSG00000175928	LRRN1	1.15765	0.626696	0.949506	3.39836	2.01479	1.95134	0.911282	2.45483	2.69382	0.0015747	0.060035	Immunoglobulin subtype 2||Immunoglobulin subtype||Cysteine-rich flanking region, C-terminal||Fibronectin type III||Immunoglobulin I-set||Immunoglobulin-like domain||Leucine-rich repeat, typical subtype||Leucine-rich repeat
ENSG00000145358	DDIT4L	0.480042	0.296997	0.306236	0.837543	1.08611	0.99151	0.361092	0.971723	2.69107	0.0033687	0.10526	RTP801-like
ENSG00000124507	PACSIN1	1.06264	0.852021	0.683595	3.09653	2.40699	1.43578	0.866086	2.3131	2.67075	0.0038115	0.11513	FCH domain||SH3 domain
ENSG00000228906	--	0.284406	0.659847	0.51838	0.708874	1.85619	1.31666	0.487544	1.29391	2.65393	0.048472	0.58697	--
ENSG00000135925	WNT10A	1.21811	1.03625	0.49955	2.8337	2.80903	1.60501	0.917969	2.41591	2.6318	0.0018442	0.067254	Wnt protein, conserved site||Wnt-10 protein||Wnt
ENSG00000127325	BEST3	2.83023	3.02819	1.54007	6.19816	7.56801	5.57763	2.46616	6.44793	2.61456	2.4989e-07	5.7926e-05	Bestrophin/UPF0187||-
ENSG00000186487	MYT1L	0.255131	0.246636	0.0871915	0.635906	0.333026	0.56785	0.196319	0.512261	2.60932	0.011487	0.24309	-||Zinc finger, C2HC-type||Myelin transcription factor 1
ENSG00000004848	ARX	1.27851	1.03474	0.83322	3.63129	2.75555	1.79471	1.04882	2.72719	2.60024	0.0023649	0.080269	Homeobox, conserved site||OAR domain||Homeodomain-like||Homeobox domain
ENSG00000182676	PPP1R27	0.727138	0.449873	0.198801	1.08742	1.39208	1.08757	0.458604	1.18902	2.5927	0.014392	0.27856	Ankyrin repeat-containing domain||Ankyrin repeat
ENSG00000179057	IGSF22	0.920184	1.06745	0.831112	2.12971	2.76689	2.40502	0.939583	2.43387	2.59037	7.6926e-10	4.2598e-07	Immunoglobulin subtype 2||Immunoglobulin subtype||Fibronectin type III||-||Immunoglobulin I-set||Immunoglobulin-like domain
ENSG00000025039	RRAGD	0.639118	0.529575	0.624057	1.85306	1.7366	1.01723	0.597583	1.53563	2.56974	0.00040038	0.021729	Gtr1/RagA G protein||P-loop containing nucleoside triphosphate hydrolase
ENSG00000198768	APCDD1L	1.12024	0.89729	0.765686	2.493	2.29784	2.22263	0.927738	2.33782	2.51992	3.0083e-06	0.0004661	APCDD1 domain||-
ENSG00000162975	KCNF1	0.0747151	0.281686	0.102136	0.395728	0.43887	0.319286	0.152846	0.384628	2.51644	0.020864	0.3561	Potassium channel, voltage dependent, Kv||POZ domain||Potassium channel tetramerisation-type BTB domain||Potassium channel||Potassium channel, voltage dependent, Kv9||Ion transport domain
ENSG00000170579	DLGAP1	0.200949	0.322767	0.359221	0.828343	0.726372	0.660562	0.294312	0.738426	2.50899	0.00029165	0.017304	SAPAP family
ENSG00000104879	CKM	10.3986	15.6548	8.00697	29.0053	35.0283	21.3917	11.3535	28.4751	2.50805	0.00019547	0.012646	ATP:guanido phosphotransferase, catalytic domain||ATP:guanido phosphotransferase, N-terminal||ATP:guanido phosphotransferase active site
ENSG00000146411	SLC2A12	0.363634	0.210916	0.209301	0.691686	0.78693	0.480497	0.261284	0.653038	2.49934	0.00031638	0.018442	Major facilitator superfamily domain||Sugar/inositol transporter||Major facilitator, sugar transporter-like||Sugar transporter, conserved site
ENSG00000036448	MYOM2	6.94489	5.94102	2.5458	15.5693	16.0035	6.92214	5.1439	12.8316	2.49453	0.023909	0.38792	Immunoglobulin subtype||Fibronectin type III||Immunoglobulin subtype 2||Immunoglobulin I-set||Immunoglobulin-like domain
ENSG00000077009	NMRK2	2.28163	1.89878	1.5595	4.82149	6.40969	3.02046	1.9133	4.75055	2.4829	0.0062166	0.16112	P-loop containing nucleoside triphosphate hydrolase||-
ENSG00000115112	TFCP2L1	0.397486	0.821964	0.531554	1.16302	1.77084	1.38474	0.583668	1.43953	2.46635	4.9242e-05	0.0043055	Sterile alpha motif/pointed domain||CP2 transcription factor
ENSG00000122477	LRRC39	2.19653	1.9555	1.22202	4.9655	4.60079	3.65641	1.79135	4.40757	2.46048	2.3645e-07	5.5673e-05	Leucine-rich repeat, typical subtype||Leucine-rich repeat
ENSG00000130203	APOE	17.3206	20.8633	11.417	46.8376	48.5624	26.0075	16.5336	40.4692	2.44769	0.0025353	0.084424	Apolipoprotein A/E
ENSG00000260398	--	0.159451	0.290668	0.171263	0.454203	0.579801	0.486711	0.207127	0.506905	2.44731	0.00080911	0.036493	--
ENSG00000133110	POSTN	1.17369	1.55603	1.75724	3.80763	3.23428	3.92093	1.49565	3.65428	2.44327	9.6746e-12	7.6132e-09	FAS1 domain||TGF beta-induced protein bIGH3/osteoblast-specific factor 2||EMI domain
ENSG00000144847	IGSF11	0.324398	0.275965	0.3252	0.646843	0.621048	0.993499	0.308521	0.753796	2.44326	0.0024208	0.081772	-||Immunoglobulin-like domain||Immunoglobulin subtype 2||Immunoglobulin V-set domain||Immunoglobulin subtype
ENSG00000120594	PLXDC2	1.41748	1.2722	0.591511	3.2727	2.42481	2.31139	1.09373	2.66963	2.44085	8.612e-05	0.0067592	Plexin repeat||Plexin-like fold
ENSG00000101210	EEF1A2	2.80179	2.69528	2.14857	6.6711	7.73068	4.25872	2.54855	6.22017	2.44067	0.00062471	0.03013	Translation elongation factor EFTu/EF1A, domain 2||Translation elongation factor EF1A, eukaryotic/archaeal||Tr-type G domain, conserved site||Translation elongation factor EF1A/initiation factor IF2gamma, C-terminal||Translation protein, beta-barrel domain||Translation elongation factor EFTu/EF1A, C-terminal||P-loop containing nucleoside triphosphate hydrolase||Transcription factor, GTP-binding d…
ENSG00000214967	NPIPA7	0.587552	0.419438	0.247135	0.844878	1.53388	0.675994	0.418041	1.01825	2.43576	0.049554	0.59272	-
ENSG00000196208	GREB1	0.0663291	0.1385	0.0544034	0.198388	0.190476	0.240932	0.0864109	0.209932	2.42946	0.049859	0.59518	-
ENSG00000154262	ABCA6	0.121336	0.0879718	0.103667	0.264623	0.197977	0.291664	0.104325	0.251421	2.40998	0.045889	0.57009	AAA+ ATPase domain||P-loop containing nucleoside triphosphate hydrolase||-||ABC transporter-like
ENSG00000205336	ADGRG1	73.5482	75.4972	47.7368	160.691	191.622	115.297	65.5941	155.87	2.37628	0.0002499	0.015269	-||GPS motif||GPCR, family 2, orphan receptor, GPR56/AGRG5||GPCR, family 2, secretin-like||GPCR, family 2-like
ENSG00000120057	SFRP5	5.91501	3.02562	1.68721	11.0572	8.87604	5.22459	3.54261	8.38595	2.36717	0.03077	0.45217	Frizzled domain||Netrin module, non-TIMP type||Tissue inhibitor of metalloproteinases-like, OB-fold||Netrin domain
ENSG00000158022	TRIM63	1.63606	2.05606	1.60283	3.77199	4.66266	4.04925	1.76498	4.1613	2.3577	9.3826e-09	3.6917e-06	Zinc finger, RING-type||B-box-type zinc finger||COS domain||Zinc finger, RING-type, conserved site
ENSG00000175874	CREG2	0.174968	0.166066	0.152207	0.277519	0.477537	0.407838	0.164414	0.387631	2.35766	0.017905	0.32312	FMN-binding split barrel||Cellular repressor of E1A-stimulated genes (CREG)
ENSG00000187288	CIDEC	0.349026	0.404886	0.477121	1.08742	0.740331	1.07203	0.410344	0.966595	2.35557	0.019665	0.34248	CIDE-N domain
ENSG00000233952	--	0.884047	0.932302	0.219727	1.80283	1.67848	1.28791	0.678692	1.58974	2.34236	0.046929	0.57702	--
ENSG00000126878	AIF1L	4.76907	3.89668	2.89119	9.81949	11.6924	5.44944	3.85231	8.98711	2.33291	0.01054	0.23141	-||EF-hand domain
ENSG00000161249	DMKN	0.387681	0.963701	1.51418	1.93257	3.18086	1.53837	0.955188	2.21727	2.32129	0.024966	0.3988	-
ENSG00000092068	SLC7A8	1.65736	1.43587	0.745648	2.09161	3.14922	3.60851	1.27963	2.94978	2.30518	0.0011161	0.046548	L-type amino acid transporter||-||Amino acid/polyamine transporter I
ENSG00000101892	ATP1B4	1.18219	1.31124	1.04902	3.45058	2.28761	2.42625	1.18081	2.72148	2.30475	2.9012e-05	0.0027895	Sodium/potassium-transporting ATPase subunit beta
ENSG00000114315	HES1	2.01553	1.6865	0.542016	3.82951	3.53662	2.40038	1.41468	3.2555	2.30122	0.0054184	0.14591	Myc-type, basic helix-loop-helix (bHLH) domain||Orange domain
ENSG00000187268	FAM9C	0.179898	0.121735	0.163948	0.485756	0.215254	0.36837	0.155194	0.35646	2.29687	0.021099	0.35827	-||XLR/SYCP3/FAM9 domain
ENSG00000184113	CLDN5	28.4825	27.0201	18.4066	56.8359	63.2231	49.0866	24.6364	56.3819	2.28856	4.261e-09	1.9603e-06	PMP-22/EMP/MP20/Claudin superfamily||Claudin, conserved site||Claudin-5
ENSG00000262061	--	1.40248	1.25507	1.2051	3.04621	2.61526	3.16791	1.28755	2.94313	2.28583	6.1486e-05	0.0050931	--
ENSG00000188322	SBK1	0.351159	0.24839	0.234164	0.832557	0.726687	0.329408	0.277904	0.629551	2.26535	0.033383	0.47649	Serine/threonine-protein kinase, active site||Serine/threonine-protein kinase, Sbk1||Protein kinase-like domain||Serine/threonine/dual specificity protein kinase, catalytic domain||Protein kinase domain
ENSG00000120669	SOHLH2	0.271002	0.0967303	0.170982	0.285773	0.462586	0.467691	0.179571	0.40535	2.25732	0.047429	0.58076	Myc-type, basic helix-loop-helix (bHLH) domain||-
ENSG00000141161	UNC45B	5.7433	4.67769	3.17333	12.8282	11.2633	6.55081	4.53144	10.2141	2.25405	0.0070654	0.17636	Tetratricopeptide repeat||Armadillo-type fold||Tetratricopeptide repeat 1||Armadillo||UNC-45/Cro1/She4, central domain||Tetratricopeptide repeat-containing domain
ENSG00000176170	SPHK1	0.897378	1.91409	1.22672	2.66959	3.28736	3.12354	1.34606	3.02683	2.24865	2.3367e-06	0.00037976	-||Diacylglycerol kinase, catalytic domain||NAD kinase/diacylglycerol kinase-like domain
ENSG00000177614	PGBD5	6.61659	4.85838	2.95402	12.2213	10.8396	9.13557	4.80966	10.7321	2.23137	3.5418e-05	0.0032758	PiggyBac transposable element-derived protein
ENSG00000101470	TNNC2	10.445	13.9808	14.5138	31.0404	32.8865	22.9309	12.9799	28.9526	2.23058	1.2694e-06	0.00023323	EF-hand domain pair||EF-Hand 1, calcium-binding site||EF-hand domain
ENSG00000124701	APOBEC2	7.16929	8.05814	5.38264	15.9712	19.3467	10.596	6.87002	15.3046	2.22774	0.0022371	0.076981	APOBEC-like, N-terminal||Cytidine deaminase-like
ENSG00000113504	SLC12A7	27.4782	28.71	16.7149	58.7521	62.3754	41.1615	24.301	54.0963	2.22609	0.00015954	0.010757	SLC12A transporter family||-||Amino acid permease/ SLC12A domain||K/Cl co-transporter
ENSG00000254586	--	2.12749	1.9107	1.31342	3.93427	4.29994	3.66596	1.78387	3.96672	2.22366	0.00076537	0.034905	--
ENSG00000185432	METTL7A	7.56545	8.41761	8.00513	15.865	18.6111	18.8268	7.99606	17.7676	2.22205	1.809e-25	1.8031e-21	-||Methyltransferase type 11||S-adenosyl-L-methionine-dependent methyltransferase
ENSG00000181778	TMEM252	0.309077	0.43822	0.281674	0.898761	0.762059	0.623714	0.34299	0.761511	2.22021	0.035464	0.49089	-
ENSG00000116990	MYCL	12.6935	14.5351	9.42699	27.5304	32.0699	21.7775	12.2185	27.1259	2.22006	1.6364e-05	0.001773	Transcription regulator Myc, N-terminal||Transcription regulator Myc||Myc-type, basic helix-loop-helix (bHLH) domain
ENSG00000142661	MYOM3	12.1113	13.6672	7.15989	26.2462	29.6259	17.0216	10.9795	24.2979	2.21304	0.0025956	0.085859	Immunoglobulin subtype 2||Fibronectin type III||Immunoglobulin subtype||Immunoglobulin-like domain||Immunoglobulin I-set
ENSG00000126368	NR1D1	1.31105	1.44931	1.91873	3.3062	4.02667	3.01553	1.55969	3.44947	2.21163	4.3166e-08	1.3171e-05	Nuclear hormone receptor||Nuclear hormone receptor, ligand-binding domain||Zinc finger, nuclear hormone receptor-type
ENSG00000124766	SOX4	1.64417	1.47498	1.15876	3.22379	3.37662	2.84169	1.42597	3.14737	2.20718	4.9693e-14	7.0761e-11	High mobility group box domain
ENSG00000170745	KCNS3	7.18136	6.94225	5.09028	15.8277	13.7137	12.858	6.40463	14.1331	2.2067	1.214e-11	9.3085e-09	Potassium channel, voltage dependent, Kv||POZ domain||BTB/POZ domain||Potassium channel, voltage dependent, Kv9||Ion transport domain||Potassium channel tetramerisation-type BTB domain||Potassium channel
ENSG00000224596	--	0.235245	0.227412	0.321581	0.635202	0.486191	0.607362	0.261412	0.576252	2.20438	0.011618	0.245	--
ENSG00000168453	HR	3.08504	3.12242	2.32091	6.3992	6.29716	6.08301	2.84279	6.25979	2.20199	2.7494e-12	2.4181e-09	-||JmjC domain
ENSG00000171004	HS6ST2	1.77671	1.77296	1.59307	4.09508	4.43883	2.69414	1.71425	3.74268	2.18328	0.00025607	0.015532	Sulfotransferase||P-loop containing nucleoside triphosphate hydrolase
ENSG00000183762	KREMEN1	12.8397	15.6719	10.1057	27.2345	34.5636	22.1461	12.8724	27.9814	2.17375	0.00020872	0.01328	Carbohydrate-binding WSC, subgroup||Kremen||Carbohydrate-binding WSC||Kringle-like fold||Kringle, conserved site||-||Kringle||CUB domain
ENSG00000272702	--	0.162158	0.188111	0.406398	0.336812	0.49389	0.808457	0.252222	0.546387	2.16629	0.037508	0.50649	--
ENSG00000173868	PHOSPHO1	2.24281	2.35397	1.84929	5.90069	4.78633	3.27085	2.14869	4.65263	2.16533	0.001698	0.063391	HAD-superfamily hydrolase, subfamily IB, PSPase-like||Phosphatase PHOSPHO-type||HAD-like domain||Pyridoxal phosphate phosphatase-related
ENSG00000188916	FAM196A	0.992813	0.95141	0.545823	1.77523	2.02842	1.57947	0.830015	1.79437	2.16185	2.1322e-06	0.00035422	FAM196 family
ENSG00000267069	--	1.34158	1.21797	0.478423	2.32616	2.05574	2.18107	1.01266	2.18766	2.16031	0.0094974	0.21712	--
ENSG00000164776	PHKG1	0.933337	0.67025	0.911341	2.3817	1.6244	1.42447	0.838309	1.81019	2.15933	0.0052027	0.14234	Serine/threonine/dual specificity protein kinase, catalytic domain||Protein kinase domain||Protein kinase-like domain||Protein kinase, ATP binding site||-||Serine/threonine-protein kinase, active site||Phosphorylase kinase, gamma catalytic subunit
ENSG00000214814	FER1L6	0.37335	0.591351	0.510372	0.680027	1.134	1.36535	0.491691	1.05979	2.1554	0.0033064	0.10408	Ferlin B-domain||C2 domain||FerIin domain
ENSG00000231652	--	0.195034	0.326802	0.118494	0.37809	0.396013	0.601938	0.213443	0.45868	2.14896	0.042417	0.54228	--
ENSG00000165795	NDRG2	4.69843	10.653	6.94829	13.7335	18.789	15.2868	7.43325	15.9364	2.14394	0.00012177	0.0087324	NDRG||-||Alpha/Beta hydrolase fold
ENSG00000109819	PPARGC1A	0.942275	0.717333	0.684301	1.61466	2.22931	1.16397	0.781303	1.66931	2.13657	0.0085708	0.20181	RNA recognition motif domain||-
ENSG00000155265	GOLGA7B	0.370962	0.286888	0.286061	0.794217	0.60838	0.609715	0.314637	0.670771	2.13189	0.00034106	0.019352	Golgin subfamily A member 7/ERF4
ENSG00000010379	SLC6A13	0.501828	0.756784	0.343001	1.25079	0.589538	1.55476	0.533871	1.1317	2.11979	0.045624	0.56798	Sodium:neurotransmitter symporter||-||Sodium:neurotransmitter symporter, GABA, GAT-2
ENSG00000169026	MFSD7	2.0971	2.03332	1.75428	4.36879	4.04477	4.04613	1.96156	4.15323	2.11731	1.5988e-06	0.00027958	Major facilitator superfamily domain||Major facilitator superfamily
ENSG00000103044	HAS3	0.334964	0.471838	0.163535	0.715617	0.749541	0.587907	0.323445	0.684355	2.11583	0.026528	0.41578	Nucleotide-diphospho-sugar transferases
ENSG00000238042	--	0.709371	1.04733	0.705247	1.68772	1.93608	1.5846	0.820649	1.73613	2.11556	0.025816	0.40802	--
ENSG00000184828	ZBTB7C	3.91323	4.74969	2.32799	7.27006	9.93222	6.00006	3.66364	7.73411	2.11105	0.004206	0.12282	POZ domain||BTB/POZ domain||Zinc finger, C2H2||-||Zinc finger, C2H2-like||Armadillo-type fold
ENSG00000185818	NAT8L	0.448408	0.650216	0.306489	0.996566	1.20965	0.758503	0.468371	0.988238	2.10995	0.0023398	0.079712	Acyl-CoA N-acyltransferase||GNAT domain
ENSG00000142408	CACNG8	0.0733206	0.113407	0.0735019	0.1462	0.204174	0.19844	0.0867431	0.182938	2.10896	0.0077065	0.1869	Voltage-dependent calcium channel, gamma subunit||Voltage-dependent calcium channel, gamma-8 subunit||PMP-22/EMP/MP20/Claudin superfamily
ENSG00000162981	FAM84A	0.518977	0.571162	0.218291	0.978443	0.781647	0.99516	0.436143	0.918417	2.10577	0.00054001	0.027094	LRAT-like domain
ENSG00000259881	--	2.061	2.48461	1.10487	3.82756	4.32551	3.66977	1.88349	3.94095	2.09236	5.9725e-05	0.0050136	--
ENSG00000107859	PITX3	7.6622	7.88804	4.80638	14.344	17.4053	10.8082	6.78554	14.1858	2.0906	0.0010524	0.044573	OAR domain||Homeobox, conserved site||Homeobox protein Pitx/unc30||Homeodomain-like||Homeobox domain
ENSG00000136859	ANGPTL2	18.5399	28.1489	20.9733	42.8432	50.083	48.0875	22.554	47.0046	2.08409	2.6494e-12	2.4008e-09	Fibrinogen, alpha/beta/gamma chain, C-terminal globular domain||Fibrinogen, conserved site
ENSG00000116132	PRRX1	1.42147	2.81295	1.33354	3.8556	4.51134	3.21591	1.85599	3.86095	2.08026	0.0011381	0.047135	Homeobox domain||Homeodomain-like||Homeobox, conserved site||OAR domain
ENSG00000136546	SCN7A	0.241768	0.204952	0.0889803	0.382419	0.351996	0.377503	0.178567	0.370639	2.07563	0.010662	0.23221	-||Sodium ion transport-associated||Ion transport domain||Voltage gated sodium channel, alpha subunit
ENSG00000189350	FAM179A	0.207138	0.282693	0.366441	0.425176	0.77933	0.572763	0.285424	0.592423	2.07559	0.0046262	0.13088	Armadillo-type fold||CLASP N-terminal domain||-
ENSG00000262179	--	86.5946	86.4336	67.721	164.185	187.818	147.083	80.2497	166.362	2.07305	1.3587e-09	6.7718e-07	--
ENSG00000172548	NIPAL4	0.666248	0.470446	0.277189	0.902501	1.24778	0.773676	0.471294	0.974651	2.06803	0.022851	0.3769	Magnesium transporter NIPA||-
ENSG00000099953	MMP11	17.711	12.506	12.3311	37.655	24.0757	26.0904	14.1827	29.2737	2.06405	0.0010057	0.043087	Hemopexin, conserved site||-||Hemopexin-like repeats||Peptidase M10A||Peptidase M10A, cysteine switch, zinc binding site||Peptidase M10, metallopeptidase||Hemopexin-like domain||Peptidase M10A, stromelysin-type||Peptidase, metallopeptidase
ENSG00000055732	MCOLN3	0.269859	0.273917	0.184449	0.378346	0.418297	0.702736	0.242741	0.499793	2.05895	0.020215	0.34895	Polycystin cation channel, PKD1/PKD2||-
ENSG00000077522	ACTN2	37.8877	38.4192	22.6481	75.9667	82.9497	44.2499	32.985	67.7221	2.05312	0.011126	0.23833	EF-hand domain||EF-hand, Ca insensitive||Actinin-type actin-binding domain, conserved site||Spectrin/alpha-actinin||Calponin homology domain||Spectrin repeat
ENSG00000169891	REPS2	0.766683	0.950303	0.373282	1.29577	1.69992	1.29033	0.696756	1.42868	2.05047	0.0012484	0.050583	EF-hand domain||EF-Hand 1, calcium-binding site||EH domain
ENSG00000133020	MYH8	6.6954	8.7604	4.77951	12.5866	19.5486	9.13406	6.7451	13.7564	2.03947	0.040097	0.52681	IQ motif, EF-hand binding site||Myosin tail||Myosin head, motor domain||P-loop containing nucleoside triphosphate hydrolase||Myosin, N-terminal, SH3-like
ENSG00000137225	CAPN11	0.797929	0.655656	0.409041	1.11871	1.25854	1.42077	0.620875	1.26601	2.03907	0.012536	0.25763	Peptidase C2, calpain, domain III||EF-Hand 1, calcium-binding site||Peptidase C2, calpain family||Cysteine peptidase, cysteine active site||Peptidase C2, calpain, catalytic domain||EF-hand domain||-||Peptidase C2, calpain, large subunit, domain III
ENSG00000151468	CCDC3	49.0186	48.1891	40.2963	99.6815	93.0412	86.6736	45.8347	93.1321	2.03191	6.3783e-21	3.8146e-17	-
ENSG00000158457	TSPAN33	14.3404	11.1784	6.89751	26.0036	24.4631	15.28	10.8054	21.9156	2.0282	0.0086695	0.20317	Tetraspanin/Peripherin||Tetraspanin
ENSG00000116741	RGS2	21.7222	20.159	21.4379	45.4925	44.537	38.3762	21.1064	42.8019	2.02791	1.552e-18	5.678e-15	RGS domain
ENSG00000197769	MAP1LC3C	8.5005	7.04953	6.47767	15.9581	17.4228	11.2456	7.34257	14.8755	2.02592	0.00024495	0.015071	Autophagy protein Atg8 ubiquitin-like||Ubiquitin-related domain
ENSG00000278044	--	2.26916	3.74067	1.79587	5.50697	6.85928	3.44498	2.6019	5.27041	2.0256	0.028471	0.4298	--
ENSG00000138678	AGPAT9	1.00259	0.487731	0.486324	1.61221	1.56199	0.82925	0.658883	1.33449	2.02538	0.043512	0.5518	Phospholipid/glycerol acyltransferase
ENSG00000129993	CBFA2T3	0.648668	0.359883	0.693966	1.26531	1.39892	0.783393	0.567506	1.14921	2.02502	0.010121	0.22633	Zinc finger, MYND-type||Eight-Twenty-One||NHR2-like||Myeloid transforming gene on chromosome 16 (MTG16)||-||TAFH/NHR1
ENSG00000165959	CLMN	0.217586	0.168273	0.247868	0.497133	0.378691	0.4068	0.211243	0.427542	2.02394	0.044518	0.55934	-||Calponin homology domain||Actinin-type actin-binding domain, conserved site
ENSG00000134107	BHLHE40	33.6655	18.5035	19.4601	60.3983	43.2404	41.0184	23.8764	48.2191	2.01953	0.0024067	0.081503	Orange domain||Myc-type, basic helix-loop-helix (bHLH) domain
ENSG00000111110	PPM1H	0.608016	0.705325	0.698177	1.36392	1.61905	1.0653	0.670506	1.34942	2.01254	0.0025724	0.085281	PPM-type phosphatase domain
ENSG00000118407	FILIP1	2.80185	2.70037	2.16386	5.21127	6.53009	3.68063	2.55536	5.14066	2.01172	0.0035298	0.10904	Cortactin-binding protein-2, N-terminal
ENSG00000137869	CYP19A1	0.840884	0.637802	1.37055	1.5316	1.81529	2.38409	0.949746	1.91033	2.01141	0.0010501	0.044542	Cytochrome P450, conserved site||-||Cytochrome P450||Cytochrome P450, E-class, group I
ENSG00000121440	PDZRN3	8.76019	8.25679	6.02164	18.2988	17.2496	10.7415	7.67954	15.43	2.00923	0.003193	0.10136	TRAF-like||PDZ domain||Zinc finger, RING-type, conserved site||Zinc finger, TRAF-type||Zinc finger, RING-type
ENSG00000148541	FAM13C	2.55219	2.65543	2.5537	4.49222	6.31936	4.77861	2.5871	5.19673	2.00871	6.6842e-06	0.00087666	-
ENSG00000143320	CRABP2	1.99107	1.21565	2.43531	3.85262	3.21452	4.25431	1.88068	3.77382	2.00663	0.00039116	0.021306	Calycin-like||Lipocalin/cytosolic fatty-acid binding domain||Cytosolic fatty-acid binding
ENSG00000197558	SSPO	0.604455	0.85458	0.271128	1.36534	1.36843	0.726487	0.576721	1.15342	1.99996	0.046901	0.57691	Pacifastin domain||Thrombospondin type-1 (TSP1) repeat||VWC out||Uncharacterised domain, cysteine-rich||von Willebrand factor, type D domain||Galactose-binding domain-like||VWFC domain||Low-density lipoprotein (LDL) receptor class A repeat||Coagulation factor 5/8 C-terminal domain||Low-density lipoprotein (LDL) receptor class A, conserved site||Cystine knot, C-terminal||Trypsin Inhibitor-like, cy…
ENSG00000166482	MFAP4	0.890126	0.894907	0.324482	1.40512	1.62665	1.17285	0.703172	1.40154	1.99317	0.0094617	0.21664	Fibrinogen, alpha/beta/gamma chain, C-terminal globular domain
ENSG00000176971	FIBIN	0.661853	0.639815	0.573013	1.34721	1.09431	1.27276	0.624894	1.23809	1.98128	0.0027154	0.089326	-
ENSG00000168509	HFE2	8.93445	8.46803	8.05241	16.2275	20.0502	13.9713	8.48496	16.7497	1.97404	1.0078e-05	0.0011772	Repulsive guidance molecule, N-terminal||-||Repulsive guidance molecule, C-terminal
ENSG00000279352	--	0.965452	1.19996	1.41405	2.32042	2.16037	2.57859	1.19315	2.35313	1.97219	0.01542	0.29333	--
ENSG00000173281	PPP1R3B	5.48957	5.3739	4.8941	10.0051	11.2299	9.78232	5.25252	10.3391	1.9684	1.7089e-18	5.678e-15	CBM21 (carbohydrate binding type-21) domain||Protein phosphatase 1 regulatory subunit 3B/C/D, metazoa
ENSG00000065361	ERBB3	37.2876	37.5462	24.6675	70.1255	76.9506	48.265	33.1671	65.1137	1.9632	0.0016972	0.063391	Furin-like cysteine-rich domain||-||Protein kinase domain||Furin-like repeat||Tyrosine-protein kinase, catalytic domain||Tyrosine protein kinase, EGF/ERB/XmrK receptor||Insulin-like growth factor binding protein, N-terminal||Receptor L-domain||Serine-threonine/tyrosine-protein kinase catalytic domain||Protein kinase-like domain
ENSG00000140807	NKD1	0.444147	0.681922	0.303576	1.09074	1.10835	0.600106	0.476549	0.933066	1.95797	0.030646	0.45143	EF-Hand 1, calcium-binding site||EF-hand domain
ENSG00000196296	ATP2A1	22.3509	27.1252	17.0908	41.7082	55.1553	33.2976	22.189	43.387	1.95534	0.0036926	0.11251	HAD-like domain||P-type ATPase, subfamily IIA, SERCA-type||Cation-transporting P-type ATPase, C-terminal||-||Cation-transporting P-type ATPase, N-terminal||P-type ATPase, phosphorylation site||P-type ATPase||P-type ATPase, cytoplasmic domain N||P-type ATPase, A domain
ENSG00000149043	SYT8	0.976158	0.830416	1.11201	2.51415	1.65645	1.52955	0.972862	1.90005	1.95305	0.003506	0.10873	C2 domain||Synaptotagmin||-
ENSG00000272288	--	1.34105	0.457551	1.61755	1.76957	2.3683	2.52829	1.13871	2.22206	1.95137	0.031899	0.46259	--
ENSG00000133056	PIK3C2B	6.1487	5.6235	4.48283	13.0377	10.7013	7.95887	5.41834	10.566	1.95004	0.0013641	0.054389	Phosphatidylinositol 3/4-kinase, conserved site||Phosphoinositide 3-kinase, accessory (PIK) domain||Armadillo-type fold||Phox homologous domain||Phosphatidylinositol 3-kinase, C2 domain||-||Phosphatidylinositol 3-/4-kinase, catalytic domain||Protein kinase-like domain||Phosphatidylinositol 3-kinase Ras-binding (PI3K RBD) domain||Ubiquitin-related domain||C2 domain
ENSG00000185739	SRL	4.33962	4.21433	2.82274	9.10996	8.33108	4.74238	3.79223	7.39448	1.9499	0.016883	0.31144	P-loop containing nucleoside triphosphate hydrolase||-||Dynamin-type guanine nucleotide-binding (G) domain
ENSG00000167711	SERPINF2	0.472592	0.515979	0.190011	1.0047	0.580594	0.712788	0.392861	0.766027	1.94987	0.04947	0.59262	Serpin domain||Serpin, conserved site
ENSG00000162881	OXER1	0.792217	0.612671	0.68916	1.10696	1.53547	1.43625	0.698016	1.35956	1.94775	0.0033247	0.1042	G protein-coupled receptor, rhodopsin-like||GPCR, rhodopsin-like, 7TM
ENSG00000272168	--	0.452626	0.525065	0.475956	1.01968	0.908951	0.892727	0.484549	0.940452	1.94088	0.0039572	0.11728	--
ENSG00000236345	--	2.35245	2.52427	2.25107	5.05718	4.8747	3.8955	2.37593	4.60913	1.93993	3.7862e-06	0.00055773	--
ENSG00000073282	TP63	0.487245	0.965593	0.69382	1.51805	1.66952	0.976022	0.715552	1.38786	1.93957	0.0084238	0.19928	p53, DNA-binding domain||Sterile alpha motif/pointed domain||p53, tetramerisation domain||p53 tumour suppressor family||Sterile alpha motif domain||p53-like transcription factor, DNA-binding
ENSG00000144596	GRIP2	1.07044	0.917824	0.530183	1.93337	1.95415	0.986151	0.839484	1.62456	1.93518	0.042097	0.5407	PDZ domain||-
ENSG00000139914	FITM1	18.183	18.1579	14.7144	32.1198	39.1283	27.3059	17.0184	32.8513	1.93034	3.3835e-05	0.0031917	Fat storage-inducing transmembrane protein
ENSG00000167202	TBC1D2B	46.5621	38.6878	32.9145	87.6202	68.5776	71.7795	39.3881	75.9924	1.92932	3.1427e-07	7.0033e-05	Rab-GTPase-TBC domain||Pleckstrin homology domain||-
ENSG00000123612	ACVR1C	0.302874	0.190313	0.276021	0.408906	0.494182	0.579737	0.256403	0.494275	1.92773	0.014167	0.27649	Serine/threonine-protein kinase, active site||Activin types I and II receptor domain||Protein kinase domain||GS domain||Serine/threonine/dual specificity protein kinase, catalytic domain||Protein kinase, ATP binding site||Protein kinase-like domain
ENSG00000183091	NEB	6.68441	8.41856	6.03	12.3893	18.86	9.48119	7.04432	13.5768	1.92734	0.027521	0.42111	Nebulin repeat||Nebulin||SH3 domain
ENSG00000127399	LRRC61	0.641167	0.43061	0.553566	1.26165	1.10122	0.757091	0.541781	1.03999	1.91957	0.038945	0.51782	Leucine-rich repeat||Leucine rich repeat 4
ENSG00000173991	TCAP	4.5821	3.5925	2.6351	6.37986	8.66224	5.67175	3.60323	6.90462	1.91623	0.0035344	0.10907	Telethonin
ENSG00000162849	KIF26B	0.157163	0.112862	0.0920753	0.242495	0.234453	0.215876	0.1207	0.230942	1.91335	0.041145	0.53424	P-loop containing nucleoside triphosphate hydrolase||Kinesin motor domain
ENSG00000163492	CCDC141	5.1909	6.94379	4.69225	11.047	11.3191	9.77892	5.60898	10.715	1.91033	4.5821e-09	2.0574e-06	Spectrin repeat||Immunoglobulin-like domain||Immunoglobulin I-set||Immunoglobulin subtype 2||Immunoglobulin subtype
ENSG00000087495	PHACTR3	0.578059	1.05376	1.12887	1.23497	2.2367	1.78653	0.92023	1.75273	1.90467	0.0087399	0.20434	-||RPEL repeat
ENSG00000130595	TNNT3	65.0965	60.6576	40.5446	123.248	116.27	77.1071	55.4329	105.542	1.90396	0.003509	0.10873	Troponin
ENSG00000259891	--	0.402452	0.266778	0.261978	0.549316	0.50031	0.716596	0.310403	0.588741	1.8967	0.036914	0.50279	--
ENSG00000142046	TMEM91	0.666456	1.48677	0.490565	1.34167	1.73987	1.91694	0.881262	1.66616	1.89065	0.03081	0.45217	-||CD225/Dispanin family
ENSG00000172986	GXYLT2	9.24525	8.08492	6.53304	17.4422	14.8529	12.7339	7.9544	15.0096	1.88696	1.7647e-05	0.0018713	Nucleotide-diphospho-sugar transferases||Glycosyl transferase, family 8
ENSG00000141068	KSR1	9.02588	8.83866	6.81018	18.4429	14.9948	13.1179	8.22491	15.5185	1.88677	4.0395e-05	0.0036604	Protein kinase domain||Kinase suppressor of RAS, SAM-like domain||-||Serine/threonine/dual specificity protein kinase, catalytic domain||Protein kinase-like domain||Serine-threonine/tyrosine-protein kinase catalytic domain||Protein kinase C-like, phorbol ester/diacylglycerol-binding domain||Serine/threonine-protein kinase, active site
ENSG00000100100	PIK3IP1	5.96296	5.93612	6.21473	10.8834	10.9025	12.3796	6.03794	11.3885	1.88615	3.6427e-13	4.0344e-10	Kringle, conserved site||Kringle-like fold||Kringle
ENSG00000165029	ABCA1	0.621269	0.706285	0.492582	1.54849	1.05424	0.823024	0.606712	1.14192	1.88214	0.020246	0.34914	P-loop containing nucleoside triphosphate hydrolase||AAA+ ATPase domain||-||ABC transporter-like||ABC transporter, conserved site
ENSG00000101680	LAMA1	0.358652	0.289976	0.237712	0.514687	0.468154	0.685052	0.295447	0.555964	1.88177	0.0073705	0.18155	Laminin, N-terminal||Laminin EGF domain||Laminin G domain||Laminin IV||Laminin alpha, domain I||EGF-like domain||Laminin domain II||Concanavalin A-like lectin/glucanase domain
ENSG00000198929	NOS1AP	0.314034	0.619298	0.386358	0.841424	1.06577	0.570344	0.439897	0.825847	1.87737	0.027923	0.42557	PTB/PI domain||-
ENSG00000138100	TRIM54	12.7454	14.2195	12.7562	25.9733	27.544	21.0153	13.2404	24.8442	1.8764	6.2616e-08	1.7832e-05	Zinc finger, RING-type, conserved site||B-box-type zinc finger||Zinc finger, RING-type||COS domain
ENSG00000261269	--	0.49896	0.678611	0.423361	0.922011	1.0331	1.04774	0.533644	1.00095	1.87569	0.0045383	0.12949	--
ENSG00000183778	B3GALT5	0.169918	0.332628	0.203245	0.397047	0.540629	0.385754	0.235264	0.441143	1.8751	0.016128	0.30197	Glycosyl transferase, family 31
ENSG00000150967	ABCB9	1.46893	0.976974	0.803216	2.19676	2.3009	1.56933	1.08304	2.02233	1.86727	0.003997	0.11776	ABC transporter-like||ABC transporter, conserved site||-||ABC transporter type 1, transmembrane domain||AAA+ ATPase domain||P-loop containing nucleoside triphosphate hydrolase
ENSG00000153094	BCL2L11	20.0702	17.1704	11.5807	33.9636	35.5984	21.3406	16.2737	30.3009	1.86195	0.010917	0.23588	-||Bcl-x interacting, BH3 domain||Bcl-2-like protein 11||Apoptosis, Bim N-terminal
ENSG00000164171	ITGA2	0.407008	0.472147	0.379969	0.927856	0.777473	0.636329	0.419708	0.780553	1.85975	0.0014179	0.055644	Integrin alpha chain, C-terminal cytoplasmic region, conserved site||Integrin alpha beta-propellor||Integrin alpha chain||von Willebrand factor, type A||Integrin alpha-2||-||FG-GAP repeat
ENSG00000046653	GPM6B	29.2478	33.2226	28.9661	48.6958	66.8202	54.5037	30.4788	56.6732	1.85943	2.813e-06	0.00044272	Myelin proteolipid protein PLP||Myelin proteolipid protein PLP, conserved site
ENSG00000253931	--	1.88628	1.09408	1.0744	2.54665	2.46219	2.519	1.35159	2.50928	1.85654	0.045987	0.57096	--
ENSG00000233098	--	1.03382	0.513974	0.605672	1.05831	1.39765	1.53837	0.717821	1.33144	1.85484	0.031725	0.46075	--
ENSG00000053438	NNAT	4.74305	4.35422	2.89205	7.27175	8.72999	6.16086	3.99644	7.38753	1.84853	0.00068931	0.032615	-
ENSG00000185482	STAC3	151.885	162.589	131.534	280.323	297.279	246.704	148.669	274.769	1.84819	3.3959e-11	2.2566e-08	SH3 domain||-||Variant SH3 domain||Protein kinase C-like, phorbol ester/diacylglycerol-binding domain
ENSG00000104081	BMF	31.6607	33.8123	27.7782	59.2041	58.33	54.2568	31.0837	57.2636	1.84224	7.7062e-20	3.292e-16	-||Bcl-2-modifying factor
ENSG00000213222	--	1.54037	1.35225	1.13822	2.59414	2.01067	2.80205	1.34361	2.46895	1.83755	0.0053282	0.14445	--
ENSG00000261039	--	10.0602	10.3938	8.5952	18.1204	17.8509	17.3811	9.68306	17.7841	1.83662	5.2493e-07	0.00010901	--
ENSG00000106537	TSPAN13	0.385476	0.596225	0.614773	1.12092	0.880542	0.926598	0.532158	0.976019	1.83408	0.038922	0.51774	Tetraspanin||Tetraspanin/Peripherin
ENSG00000108387	43712	1.49964	1.77666	1.0032	2.82324	2.87378	2.14754	1.4265	2.61485	1.83305	0.0018635	0.067695	-||P-loop containing nucleoside triphosphate hydrolase||Septin-type guanine nucleotide-binding (G) domain||Septin
ENSG00000153976	HS3ST3A1	2.3217	2.96562	2.31792	4.81146	4.52878	4.59844	2.53508	4.64623	1.83277	4.2589e-06	0.00059458	Sulfotransferase domain||P-loop containing nucleoside triphosphate hydrolase
ENSG00000130775	THEMIS2	4.11344	4.73693	5.6231	9.46683	8.77904	8.2759	4.82449	8.84059	1.83244	1.0895e-08	4.1768e-06	CABIT domain
ENSG00000115593	SMYD1	33.4521	30.394	23.8777	60.0471	61.2864	39.3926	29.2412	53.5754	1.83219	0.0026749	0.088188	Zinc finger, MYND-type||SET domain
ENSG00000122180	MYOG	288.657	299.668	174.462	518.714	565.036	311.554	254.263	465.101	1.82922	0.024488	0.39505	Myc-type, basic helix-loop-helix (bHLH) domain||Myogenic basic muscle-specific protein
ENSG00000259676	--	2.0966	1.47666	2.14955	3.82597	3.02994	3.59983	1.90761	3.48525	1.82703	0.012818	0.2604	--
ENSG00000196878	LAMB3	2.44362	2.5138	3.02531	5.13301	5.09548	4.35105	2.66091	4.85985	1.82638	7.9385e-09	3.1651e-06	Laminin EGF domain||EGF-like, conserved site||Laminin, N-terminal||-||Galactose-binding domain-like
ENSG00000237372	--	1.05959	1.29561	0.743804	1.85583	2.24285	1.56033	1.033	1.88634	1.82608	0.0052077	0.14234	--
ENSG00000064655	EYA2	1.99971	2.68797	1.17155	4.15351	2.61025	3.93365	1.95308	3.56581	1.82574	0.012027	0.24993	HAD-like domain||-||EYA domain
ENSG00000150672	DLG2	1.36002	1.67629	1.59772	2.75423	2.77384	2.92865	1.54468	2.8189	1.82492	4.2651e-05	0.0038415	P-loop containing nucleoside triphosphate hydrolase||Variant SH3 domain||Membrane-associated guanylate kinase (MAGUK), PEST domain, N-terminal||L27-1||-||SH3 domain||L27 domain||Guanylate kinase/L-type calcium channel beta subunit||Disks large 1||Guanylate kinase, conserved site||PDZ-associated domain of NMDA receptors||Guanylate kinase-like domain||PDZ domain
ENSG00000136842	TMOD1	0.98483	1.04452	0.961622	2.22673	1.81808	1.38281	0.996991	1.80921	1.81467	0.0012753	0.051467	-||Tropomodulin
ENSG00000204323	SMIM5	0.469843	0.340649	0.401424	0.609932	0.919938	0.669272	0.403972	0.733048	1.8146	0.033133	0.4745	-
ENSG00000231445	--	4.63791	8.07026	5.54755	8.12802	10.9727	13.9356	6.08524	11.0121	1.80964	0.0067376	0.16986	--
ENSG00000139044	B4GALNT3	1.56937	1.86494	1.70057	3.36302	3.02281	2.90343	1.71163	3.09642	1.80905	1.435e-05	0.0015777	PA14 domain||Nucleotide-diphospho-sugar transferases||Chondroitin N-acetylgalactosaminyltransferase
ENSG00000196811	CHRNG	30.8305	30.4541	22.2509	57.9676	53.1169	39.9417	27.8452	50.342	1.80793	0.00045259	0.023619	Neurotransmitter-gated ion-channel ligand-binding domain||Nicotinic acetylcholine receptor||Neurotransmitter-gated ion-channel||Neurotransmitter-gated ion-channel transmembrane domain||Neurotransmitter-gated ion-channel, conserved site
ENSG00000170624	SGCD	39.9711	26.4731	26.4726	67.7166	52.274	47.9225	30.9723	55.971	1.80713	0.0012235	0.049909	Sarcoglycan complex subunit protein||-
ENSG00000103489	XYLT1	1.18522	1.73136	1.74022	3.06354	2.84587	2.48555	1.55227	2.79832	1.80273	2.5124e-06	0.00039973	Xylosyltransferase||Glycosyl transferase, family 14
ENSG00000164674	SYTL3	2.48739	3.06724	1.76708	3.466	5.57329	4.1221	2.44057	4.38713	1.79758	0.0096075	0.21854	Zinc finger, FYVE/PHD-type||C2 domain||Rab-binding domain
ENSG00000170807	LMOD2	2.01727	1.45878	1.6116	3.52612	2.76996	2.82688	1.69588	3.04099	1.79316	0.00030244	0.017788	WH2 domain||Tropomodulin
ENSG00000139946	PELI2	0.354231	0.821847	0.726355	0.882911	1.2022	1.32454	0.634145	1.13655	1.79226	0.0042376	0.12327	Pellino family
ENSG00000186642	PDE2A	6.19831	6.27318	3.97719	12.3751	10.2785	6.82465	5.48289	9.82608	1.79213	0.021815	0.36586	3'5'-cyclic nucleotide phosphodiesterase||GAF domain||GAF domain-like||-||3'5'-cyclic nucleotide phosphodiesterase, catalytic domain||3'5'-cyclic nucleotide phosphodiesterase, conserved site||HD/PDEase domain
ENSG00000101665	SMAD7	4.14664	4.32521	2.9057	7.99038	5.73106	6.66368	3.79252	6.79504	1.7917	0.00016621	0.011119	MAD homology 1, Dwarfin-type||MAD homology, MH1||SMAD/FHA domain||SMAD domain, Dwarfin-type
ENSG00000260948	--	0.52837	0.735519	0.520046	0.974541	0.882801	1.33218	0.594645	1.06317	1.78791	0.010572	0.23144	--
ENSG00000257859	--	1.00602	0.648346	0.87862	1.56717	1.60498	1.34347	0.844328	1.5052	1.78273	0.012556	0.25763	--
ENSG00000132386	SERPINF1	180.511	177.332	137.872	318.023	316.203	249.476	165.238	294.568	1.78269	4.8423e-06	0.00066728	Serpin domain||-||Serpin, conserved site
ENSG00000135744	AGT	1.95956	1.88349	1.86236	3.72125	3.19121	3.22995	1.9018	3.3808	1.77768	1.0924e-05	0.0012564	Serpin domain||Angiotensinogen||Serpin, conserved site
ENSG00000015133	CCDC88C	4.88781	4.76403	3.68525	8.66605	9.86616	5.1142	4.44569	7.88214	1.77298	0.029246	0.43836	Hook-related protein family||-
ENSG00000122574	WIPF3	3.43847	3.8486	2.88332	6.9685	6.69658	4.35418	3.39013	6.00642	1.77174	0.0044718	0.12809	WH2 domain
ENSG00000068903	SIRT2	181.256	177.042	135.869	311.326	326.702	234.884	164.722	290.971	1.76643	0.00020951	0.013301	-||Sirtuin family, catalytic core domain||Sirtuin family||Sirtuin, class I||DHS-like NAD/FAD-binding domain
ENSG00000119630	PGF	22.8326	21.3116	19.3562	37.5368	38.8461	35.6127	21.1668	37.3319	1.7637	1.1202e-15	2.7322e-12	Cystine-knot cytokine||PDGF/VEGF domain||Platelet-derived growth factor, conserved site
ENSG00000085465	OVGP1	0.685921	1.06093	0.98975	1.47219	1.64146	1.70987	0.9122	1.60784	1.76259	0.021095	0.35827	Chitinase insertion domain||Glycoside hydrolase family 18, catalytic domain||Glycoside hydrolase superfamily||Chitinase II
ENSG00000162745	OLFML2B	95.2516	103.261	77.8935	163.423	180.905	142.534	92.1353	162.287	1.7614	1.1094e-06	0.00020865	Olfactomedin-like domain||-
ENSG00000104369	JPH1	2.86206	3.09426	2.79461	5.75056	5.38781	4.2641	2.91698	5.13416	1.76009	3.9312e-06	0.00057066	MORN motif||Junctophilin||-
ENSG00000121104	FAM117A	13.9359	14.5166	9.46044	20.0257	24.4399	22.1806	12.6377	22.2154	1.75787	5.9689e-06	0.00079682	-||Glucocorticoid-induced transcript 1/FAM117
ENSG00000239887	C1orf226	2.37895	1.72164	1.99897	3.61752	3.01981	4.08046	2.03319	3.5726	1.75714	2.9314e-05	0.0028096	Protein of unknown function DUF4628
ENSG00000100292	HMOX1	29.4412	37.6704	24.1478	51.9146	58.276	50.0438	30.4198	53.4115	1.75581	2.4177e-06	0.00038869	Haem oxygenase conserved site||Haem oxygenase-like, multi-helical||Haem oxygenase-like||Haem oxygenase
ENSG00000230918	--	1.00209	1.54995	2.55707	1.99814	3.4009	3.56858	1.70304	2.98921	1.75522	0.030467	0.44991	--
ENSG00000230438	--	1.88575	2.27169	1.58636	3.25396	3.45556	3.37063	1.9146	3.36005	1.75496	0.0014078	0.055483	--
ENSG00000205309	NT5M	6.81317	6.95704	4.12701	10.1178	12.9406	8.28129	5.96574	10.4466	1.75109	0.010952	0.23629	HAD-like domain||5'(3')-deoxyribonucleotidase||-
ENSG00000261485	--	0.379769	0.770961	0.605672	1.1832	0.826197	1.04812	0.585468	1.01917	1.74079	0.046744	0.57569	--
ENSG00000164932	CTHRC1	18.9075	23.0357	23.1192	38.8379	36.5863	37.8111	21.6875	37.7451	1.74041	4.7299e-13	4.9136e-10	-||Collagen triple helix repeat
ENSG00000180209	MYLPF	294.631	324.787	227.524	566.455	542.304	364.379	282.314	491.046	1.73936	0.0047181	0.13323	EF-Hand 1, calcium-binding site||EF-hand domain
ENSG00000215861	--	23.7379	23.0715	18.2922	41.3477	37.7448	33.781	21.7005	37.6245	1.7338	8.2725e-08	2.2087e-05	--
ENSG00000112759	SLC29A1	83.3736	85.5922	71.1201	138.886	145.809	130.523	80.0286	138.406	1.72946	2.7221e-16	7.3998e-13	Major facilitator superfamily domain||Equilibrative nucleoside transporter
ENSG00000090238	YPEL3	26.0194	27.3879	24.953	42.9384	46.3138	46.107	26.1201	45.1197	1.7274	1.1416e-13	1.4294e-10	-||Yippee/Mis18
ENSG00000187634	SAMD11	0.416367	0.54338	0.711471	0.875629	1.12095	0.889648	0.557073	0.962075	1.72702	0.036621	0.50011	Sterile alpha motif domain||-||Sterile alpha motif/pointed domain
ENSG00000226094	--	2.81445	3.47328	2.86507	6.19404	5.54969	4.0304	3.05093	5.25804	1.72342	0.0027452	0.09011	--
ENSG00000157680	DGKI	0.783803	0.695306	1.28156	1.57055	1.76536	1.41204	0.920222	1.58265	1.71986	0.0006857	0.032495	Ankyrin repeat||Ankyrin repeat-containing domain||NAD kinase/diacylglycerol kinase-like domain||Diacylglycerol kinase, catalytic domain||Diacylglycerol kinase, accessory domain||Protein kinase C-like, phorbol ester/diacylglycerol-binding domain
ENSG00000163380	LMOD3	40.5939	40.4207	31.1117	67.802	72.5446	52.4782	37.3754	64.2749	1.71971	0.00023295	0.014542	Tropomodulin
ENSG00000156096	UGT2B4	0.728602	0.691536	0.76964	1.6922	1.08074	0.990689	0.729926	1.25454	1.71873	0.045038	0.56309	UDP-glucuronosyl/UDP-glucosyltransferase
ENSG00000107551	RASSF4	231.736	194.497	151.379	378.542	355.786	257.851	192.537	330.727	1.71773	0.0030742	0.098214	SARAH domain||Ubiquitin-related domain||-||Ras-associating (RA) domain
ENSG00000139508	SLC46A3	7.37346	5.78916	5.02798	12.6753	9.28657	9.27947	6.06354	10.4138	1.71744	0.001415	0.055602	Major facilitator superfamily||Major facilitator superfamily domain
ENSG00000076555	ACACB	2.95899	2.75761	2.06793	5.77999	3.64542	3.92489	2.59484	4.4501	1.71498	0.012007	0.24993	Carboxyl transferase||ClpP/crotonase-like domain||Acetyl-CoA carboxylase, central domain||Acetyl-coenzyme A carboxyltransferase, N-terminal||Acetyl-coenzyme A carboxyltransferase, C-terminal||-||Biotin carboxylase, C-terminal||Biotin/lipoyl attachment||Biotin carboxylation domain||Pre-ATP-grasp domain||ATP-grasp fold||Single hybrid motif||Carbamoyl-phosphate synthetase large subunit-like, ATP-bin…
ENSG00000233198	RNF224	0.784727	0.799976	0.715151	1.00759	1.33471	1.6005	0.766618	1.31427	1.71437	0.013313	0.26637	Zinc finger, RING-type||Zinc finger, RING-type, conserved site
ENSG00000159314	ARHGAP27	3.34247	3.50044	2.41151	5.58292	6.08997	4.19086	3.0848	5.28792	1.71418	0.0019459	0.069604	Quinonprotein alcohol dehydrogenase-like superfamily||-||SH3 domain||WW domain||Pleckstrin homology domain||Rho GTPase-activating protein domain||Rho GTPase activation protein
ENSG00000171951	SCG2	1.69501	1.96628	1.56049	2.32793	3.61227	2.99345	1.74059	2.97788	1.71084	0.0029923	0.096109	Chromogranin/secretogranin||Chromogranin, conserved site
ENSG00000114796	KLHL24	24.8315	24.7592	24.6914	42.954	42.4658	41.4348	24.7607	42.2849	1.70774	3.4545e-14	5.165e-11	BTB/POZ domain||POZ domain||-||Kelch repeat type 1||BTB-kelch protein||BTB/Kelch-associated
ENSG00000140479	PCSK6	1.47655	2.35829	2.34023	2.72019	4.72063	3.08634	2.05836	3.50905	1.70478	0.02866	0.43109	Peptidase S8, subtilisin-related||Peptidase S8, subtilisin, His-active site||Proprotein convertase, P||PLAC||Peptidase S8, subtilisin, Asp-active site||Peptidase S8, subtilisin, Ser-active site||Insulin-like growth factor binding protein, N-terminal||Proteinase inhibitor, propeptide||Furin-like repeat||EGF-like domain||Peptidase S8/S53 domain||Galactose-binding domain-like
ENSG00000159208	CIART	0.760262	0.671952	1.03928	1.21817	1.55946	1.43106	0.823833	1.40289	1.70289	0.037338	0.50567	-
ENSG00000163050	ADCK3	5.71078	7.19134	5.11029	9.43467	11.4513	9.77377	6.00414	10.2199	1.70214	3.9573e-06	0.00057166	Protein kinase-like domain||UbiB domain
ENSG00000143632	ACTA1	45.569	55.2148	35.4619	75.5837	100.602	55.3936	45.4153	77.1932	1.69972	0.035839	0.49251	Actin family||Actin, conserved site||Actin/actin-like conserved site
ENSG00000128262	--	0.398908	0.378614	0.54531	0.836088	0.615373	0.794229	0.440944	0.748563	1.69764	0.030447	0.44985	--
ENSG00000185507	IRF7	7.68048	7.10611	5.78098	12.4393	13.1102	9.33489	6.85586	11.6281	1.69609	0.00059015	0.028823	Interferon regulatory factor, conserved site||Interferon regulatory factor-3||Interferon regulatory factor DNA-binding domain||-||SMAD/FHA domain
ENSG00000260807	--	32.5667	37.0332	29.6793	55.7461	59.6317	52.9771	33.0931	56.1183	1.69577	4.7653e-13	4.9136e-10	--
ENSG00000261553	--	4.31914	3.9336	3.80672	7.48379	6.82474	6.09173	4.01982	6.80009	1.69164	1.9275e-07	4.7635e-05	--
ENSG00000100302	RASD2	1.10273	0.915799	0.650938	1.81152	1.4394	1.25842	0.889821	1.50311	1.68923	0.0057944	0.15361	Small GTPase superfamily, Ras type||Small GTPase superfamily, Rho type||Small GTPase superfamily||P-loop containing nucleoside triphosphate hydrolase||Small GTPase superfamily, Rab type||Ran GTPase||Small GTP-binding protein domain
ENSG00000105516	DBP	0.510165	0.432479	0.509637	0.758051	0.896437	0.796585	0.484094	0.817024	1.68774	0.039801	0.52477	-||Basic-leucine zipper domain
ENSG00000101605	MYOM1	5.53881	5.27923	4.14002	9.24391	9.0902	6.90358	4.98602	8.41256	1.68723	0.00024243	0.014978	-||Immunoglobulin I-set||Immunoglobulin-like domain||Immunoglobulin subtype 2||Immunoglobulin subtype||Fibronectin type III
ENSG00000103196	CRISPLD2	15.0736	11.504	9.25707	21.9632	21.0812	17.3449	11.9449	20.1297	1.68522	0.00051042	0.025958	CAP domain||-||Allergen V5/Tpx-1-related, conserved site||Cysteine-rich secretory protein, allergen V5/Tpx-1-related||LCCL domain
ENSG00000183876	ARSI	1.82478	1.79342	1.94016	3.79018	2.34883	3.22209	1.85279	3.12037	1.68415	0.0015144	0.058555	Sulfatase||Sulfatase, conserved site||Alkaline-phosphatase-like, core domain
ENSG00000232679	--	2.13018	2.20634	1.45598	2.84432	2.68124	4.22642	1.93083	3.25066	1.68355	0.035791	0.49229	--
ENSG00000182759	MAFA	2.86614	4.97013	2.18117	6.22318	6.20964	4.38785	3.33915	5.60689	1.67914	0.035665	0.49193	Basic leucine zipper domain, Maf-type||Transcription factor, Skn-1-like, DNA-binding domain||Maf transcription factor, N-terminal||Basic-leucine zipper domain
ENSG00000156804	FBXO32	47.0071	49.5985	34.8095	77.1391	80.7385	62.5511	43.805	73.4762	1.67735	0.00012556	0.008961	F-box domain
ENSG00000144645	OSBPL10	41.5572	41.7434	34.5278	63.8134	69.4589	64.3075	39.2761	65.8599	1.67684	1.8299e-15	3.648e-12	Oxysterol-binding protein, conserved site||Oxysterol-binding protein||-||Pleckstrin homology domain
ENSG00000178175	ZNF366	1.0531	0.702442	1.54756	1.6077	2.13066	1.80011	1.10103	1.84616	1.67675	0.0064169	0.16499	Zinc finger, C2H2||-||Zinc finger, C2H2-like
ENSG00000181085	MAPK15	25.0553	21.5646	18.7827	39.585	35.7118	34.0209	21.8009	36.4393	1.67146	1.5066e-08	5.1782e-06	Protein kinase-like domain||Protein kinase, ATP binding site||Protein kinase domain||Mitogen-activated protein (MAP) kinase, conserved site
ENSG00000130940	CASZ1	6.41712	6.4836	4.75914	11.0929	11.6188	6.75517	5.88662	9.82231	1.66858	0.025347	0.40295	Zinc finger, C2H2-like||Zinc finger, C2H2
ENSG00000239474	KLHL41	208.416	256.795	237.53	360.756	435.953	373.997	234.247	390.235	1.66592	1.4429e-08	5.0517e-06	POZ domain||BTB/POZ domain||Kelch repeat type 1||BTB/Kelch-associated||BTB-kelch protein
ENSG00000115221	ITGB6	41.6757	37.2939	28.156	67.632	60.0639	50.6433	35.7085	59.4464	1.66477	0.00041791	0.022356	Plexin-like fold||Integrin beta subunit, cytoplasmic domain||Integrin beta subunit, N-terminal||EGF-like domain, extracellular||-||von Willebrand factor, type A||Integrin beta subunit, tail||Integrin beta subunit
ENSG00000155846	PPARGC1B	0.345573	0.331762	0.276925	0.475217	0.591071	0.52196	0.318087	0.529416	1.66438	0.041872	0.53947	RNA recognition motif domain
ENSG00000145794	MEGF10	23.8809	24.0249	21.1637	36.6007	40.5866	37.6951	23.0232	38.2942	1.66329	5.4134e-15	9.5221e-12	EGF-like domain||EGF-like, conserved site||Laminin EGF domain||EMI domain
ENSG00000136235	GPNMB	29.9834	42.3603	38.1826	63.4603	59.6906	60.6652	36.8421	61.272	1.6631	1.5677e-11	1.0902e-08	PKD domain||-||PKD/Chitinase domain
ENSG00000018625	ATP1A2	30.6006	30.1755	22.3825	51.9694	45.4736	40.8156	27.7195	46.0862	1.66259	3.5493e-05	0.0032758	P-type ATPase, A domain||P-type ATPase, cytoplasmic domain N||P-type ATPase||P-type ATPase, phosphorylation site||Cation-transporting P-type ATPase, N-terminal||P-type ATPase, subfamily IIC||Cation-transporting P-type ATPase, C-terminal||HAD-like domain
ENSG00000105711	SCN1B	3.67823	3.72074	3.25825	5.79409	7.06742	4.80985	3.55241	5.89046	1.65816	0.0010575	0.044666	Immunoglobulin-like domain||Immunoglobulin
ENSG00000073464	CLCN4	3.3913	4.30172	2.62847	5.39815	6.46768	5.24838	3.4405	5.70474	1.65811	0.0004762	0.024524	CBS domain||Chloride channel, voltage gated||Chloride channel, core||Chloride channel ClC-4
ENSG00000260400	--	0.484378	0.669958	0.483878	1.11443	0.705219	0.895644	0.546071	0.905098	1.65747	0.029345	0.4394	--
ENSG00000068305	MEF2A	36.3743	35.8534	30.9802	59.0226	61.3928	50.5607	34.4026	56.992	1.65662	3.0874e-08	1.0258e-05	Transcription factor, MADS-box||Holliday junction regulator protein family C-terminal
ENSG00000249628	--	1.83972	1.55957	0.991453	2.33681	2.81703	2.11664	1.46358	2.42349	1.65587	0.0062834	0.16216	--
ENSG00000100767	PAPLN	1.58938	2.11803	1.23898	2.66828	2.62331	2.89083	1.6488	2.72747	1.65422	4.8065e-05	0.0042149	ADAM-TS Spacer 1||Proteinase inhibitor I2, Kunitz, conserved site||Immunoglobulin subtype||Immunoglobulin subtype 2||Peptidase M12B, ADAM-TS||Immunoglobulin V-set domain||Pancreatic trypsin inhibitor Kunitz domain||Thrombospondin type-1 (TSP1) repeat||Immunoglobulin-like domain||Immunoglobulin I-set||-||PLAC
ENSG00000111245	MYL2	4.04049	3.66449	4.4187	6.04248	8.24678	5.72935	4.04123	6.67287	1.6512	0.0042252	0.12311	EF-Hand 1, calcium-binding site||EF-hand domain
ENSG00000144857	BOC	4.21354	4.91271	4.56117	6.45055	9.21319	6.92366	4.56248	7.52913	1.65023	0.00085291	0.038064	Immunoglobulin subtype||Fibronectin type III||Immunoglobulin subtype 2||Immunoglobulin I-set||Immunoglobulin-like domain||-
ENSG00000129009	ISLR	36.5749	33.727	36.7911	57.322	57.572	61.6731	35.6976	58.8557	1.64873	6.5073e-15	1.081e-11	Leucine-rich repeat||Immunoglobulin I-set||Immunoglobulin-like domain||Cysteine-rich flanking region, C-terminal||Immunoglobulin subtype 2||Leucine-rich repeat, typical subtype
ENSG00000100284	TOM1	35.5873	38.4739	29.5285	55.6262	63.5863	51.2599	34.5299	56.8242	1.64565	3.9242e-06	0.00057066	Target of Myb protein 1||-||ENTH/VHS||VHS domain||VHS subgroup||GAT domain
ENSG00000143067	ZNF697	0.975383	0.993741	0.788419	1.41639	1.51675	1.60384	0.919181	1.51233	1.6453	0.00012713	0.0090516	Zinc finger, C2H2||Zinc finger, C2H2-like
ENSG00000115592	PRKAG3	24.9964	24.7099	16.9097	38.1557	43.0799	28.2128	22.2054	36.4828	1.64297	0.0096953	0.2196	-||CBS domain
ENSG00000070371	CLTCL1	14.4951	12.583	9.97395	21.4792	19.5979	19.7816	12.3507	20.2862	1.64252	1.101e-07	2.8383e-05	Clathrin, heavy chain, linker, core motif||-||Clathrin, heavy chain||Clathrin, heavy chain, propeller repeat||Armadillo-type fold||Clathrin, heavy chain/VPS, 7-fold repeat
ENSG00000057294	PKP2	1.05299	0.916134	0.92964	1.85905	1.48902	1.40619	0.966254	1.58475	1.6401	0.011828	0.24721	Armadillo-type fold||-||Armadillo
ENSG00000106538	RARRES2	27.6213	26.9995	22.0393	47.3742	42.244	35.8837	25.5534	41.834	1.63712	4.7948e-05	0.0042149	-
ENSG00000165507	C10orf10	12.0072	10.209	7.98781	16.4291	17.58	15.264	10.068	16.4244	1.63134	9.9434e-06	0.001166	Decidual protein, progesterone induced
ENSG00000072182	ASIC4	0.725903	1.22102	1.01712	1.58313	2.08457	1.16327	0.988014	1.61032	1.62986	0.042902	0.54707	Na+ channel, amiloride-sensitive, conserved site||Na+ channel, amiloride-sensitive
ENSG00000157119	KLHL40	9.83534	13.7544	9.49741	18.8409	19.8449	15.2078	11.029	17.9645	1.62884	0.00070475	0.033032	BTB/Kelch-associated||BTB-kelch protein||Kelch repeat type 1||POZ domain||BTB/POZ domain
ENSG00000174827	PDZK1	1.32444	1.18185	1.39271	1.9045	2.30508	2.14058	1.29967	2.11672	1.62866	0.017342	0.31652	PDZ domain
ENSG00000204618	RNF39	0.860029	0.736376	0.643817	1.35251	1.06915	1.22508	0.74674	1.21558	1.62784	0.0238	0.38743	Zinc finger, RING-type||Zinc finger, RING-type, conserved site||B30.2/SPRY domain||SPRY domain||SPRY-associated||Concanavalin A-like lectin/glucanase domain||Butyrophylin-like
ENSG00000060982	BCAT1	77.1185	55.9645	52.5563	117.852	98.9572	85.1653	61.8797	100.658	1.62667	0.0024764	0.08312	-||Branched-chain amino acid aminotransferase II||Aminotransferase, class IV, conserved site||Aminotransferase class IV
ENSG00000137868	STRA6	0.334589	0.554483	0.81676	1.01266	0.967075	0.791511	0.568611	0.923748	1.62457	0.046855	0.57675	-
ENSG00000135902	CHRND	21.0847	19.1266	16.3191	33.116	32.1755	26.4846	18.8434	30.592	1.62348	1.2728e-05	0.0014254	Nicotinic acetylcholine receptor||Neurotransmitter-gated ion-channel ligand-binding domain||Neurotransmitter-gated ion-channel transmembrane domain||Neurotransmitter-gated ion-channel, conserved site||-||Neurotransmitter-gated ion-channel
ENSG00000172508	CARNS1	10.6306	10.725	7.91497	17.5349	17.3707	12.6042	9.75683	15.8366	1.62313	0.0023597	0.080201	ATP-grasp fold
ENSG00000106078	COBL	4.72704	3.94091	3.31497	7.52043	7.19136	4.72776	3.99431	6.47985	1.62227	0.017357	0.31652	Cordon-bleu, ubiquitin-like domain||Ubiquitin-related domain||-||WH2 domain
ENSG00000159173	TNNI1	448.528	389.065	298.759	734.678	640.362	466.519	378.784	613.853	1.62059	0.014442	0.27907	Troponin
ENSG00000272841	--	1.68911	1.95945	1.87609	3.15755	2.83871	2.95496	1.84155	2.98374	1.62023	0.00054829	0.027281	--
ENSG00000107562	CXCL12	11.0902	9.90277	8.12877	17.049	16.381	13.7189	9.70725	15.7163	1.61903	2.9449e-05	0.0028135	-||Chemokine interleukin-8-like domain
ENSG00000197355	UAP1L1	13.786	16.7775	15.8488	22.3696	26.6181	25.9669	15.4707	24.9849	1.61497	2.9777e-10	1.9357e-07	UTP--glucose-1-phosphate uridylyltransferase family||-||Nucleotide-diphospho-sugar transferases
ENSG00000102385	DRP2	1.38522	1.15922	1.32835	2.64529	1.44831	2.15725	1.29093	2.08362	1.61405	0.019128	0.33666	Spectrin repeat||Dystrophin-related protein 2||Zinc finger, ZZ-type||EF-hand domain, type 2||WW domain||-||Spectrin/alpha-actinin||EF-hand domain, type 1
ENSG00000158220	ESYT3	2.70478	2.5725	2.20469	3.76859	4.29811	4.00242	2.49399	4.02304	1.61309	3.7501e-05	0.0034294	C2 domain||-
ENSG00000156486	KCNS2	0.250452	0.352793	0.29346	0.468183	0.385296	0.592474	0.298901	0.481984	1.61252	0.023006	0.3784	Potassium channel, voltage dependent, Kv||POZ domain||BTB/POZ domain||Potassium channel tetramerisation-type BTB domain||Potassium channel||Ion transport domain||Potassium channel, voltage dependent, Kv9
ENSG00000105655	ISYNA1	11.2301	11.6148	7.67584	18.1687	18.8976	11.9977	10.1736	16.3546	1.60756	0.023499	0.38441	Myo-inositol-1-phosphate synthase, GAPDH-like||-||Myo-inositol-1-phosphate synthase
ENSG00000057704	TMCC3	10.2723	10.1939	8.30524	15.4262	16.5135	14.3087	9.59047	15.4161	1.60744	6.3359e-09	2.5954e-06	Predicted transmembrane coiled-coil 2 protein
ENSG00000215018	COL28A1	0.539659	1.25206	1.20717	1.43679	1.60096	1.78204	0.99963	1.6066	1.60719	0.010398	0.22943	von Willebrand factor, type A||Collagen triple helix repeat||-||Pancreatic trypsin inhibitor Kunitz domain||Proteinase inhibitor I2, Kunitz, conserved site
ENSG00000149090	PAMR1	4.33335	3.08794	3.21573	6.99477	5.25235	4.82792	3.54567	5.69168	1.60525	0.0072502	0.17932	Peptidase S1A, chymotrypsin-type||EGF-like, conserved site||CUB domain||EGF-like domain||Sushi/SCR/CCP domain||Serine proteases, trypsin domain||EGF-like calcium-binding domain||Peptidase S1, PA clan
ENSG00000136158	SPRY2	25.3499	19.1854	21.6112	39.2319	31.6229	35.2956	22.0488	35.3834	1.60478	1.0916e-06	0.00020791	Sprouty
ENSG00000120729	MYOT	1.60488	1.95721	2.81267	3.7437	3.76003	2.72572	2.12492	3.40982	1.60468	0.0064901	0.16603	Immunoglobulin subtype 2||Immunoglobulin subtype||Immunoglobulin-like domain||Immunoglobulin I-set
ENSG00000172216	CEBPB	17.8586	20.5139	15.8668	28.5215	29.0461	29.401	18.0798	28.9895	1.60342	9.189e-12	7.4265e-09	Basic-leucine zipper domain||CCAAT/enhancer-binding protein, chordates
ENSG00000132470	ITGB4	0.788975	0.701039	0.596636	1.42257	0.81074	1.11191	0.69555	1.11507	1.60315	0.023892	0.38787	Integrin beta subunit, N-terminal||Plexin-like fold||Fibronectin type III||Integrin beta-4 subunit||EGF-like domain, extracellular||EGF-like, conserved site||von Willebrand factor, type A||-||Na-Ca exchanger/integrin-beta4||Integrin beta subunit, tail||Integrin beta subunit
ENSG00000137857	DUOX1	0.688067	0.953391	0.522551	1.19096	1.29732	0.980124	0.721336	1.15613	1.60277	0.02994	0.44586	Ferredoxin reductase-type FAD-binding domain||Haem peroxidase||Ferric reductase transmembrane component-like domain||Riboflavin synthase-like beta-barrel||EF-Hand 1, calcium-binding site||EF-hand domain||FAD-binding 8||Ferric reductase, NAD binding domain||Haem peroxidase, animal||EF-hand domain pair||-
ENSG00000123095	BHLHE41	1.16455	1.64042	2.00889	1.79685	2.89544	3.02149	1.60462	2.57126	1.60241	0.018423	0.32905	Orange domain||Myc-type, basic helix-loop-helix (bHLH) domain
ENSG00000214402	LCNL1	37.729	35.3222	37.4379	62.2363	52.5917	62.1383	36.8297	58.9888	1.60166	2.47e-14	3.8874e-11	Calycin-like||Lipocalin/cytosolic fatty-acid binding domain
ENSG00000112796	ENPP5	1.01111	0.900648	0.641736	1.17008	1.50837	1.40814	0.851166	1.3622	1.60039	0.015985	0.30025	Type I phosphodiesterase/nucleotide pyrophosphatase/phosphate transferase||Alkaline-phosphatase-like, core domain
ENSG00000122367	LDB3	18.0149	18.3888	13.2089	31.5019	28.42	19.4485	16.5375	26.4568	1.5998	0.019735	0.34311	Zinc finger, LIM-type||PDZ domain||ZASP
ENSG00000116329	OPRD1	0.493864	0.328716	0.420564	0.575112	0.623512	0.787102	0.414381	0.661909	1.59734	0.0088484	0.20607	GPCR, rhodopsin-like, 7TM||Opioid receptor||G protein-coupled receptor, rhodopsin-like||Delta opioid receptor
ENSG00000168743	NPNT	115.923	109.457	84.1108	200.896	163.498	129.614	103.164	164.669	1.59619	0.010643	0.23221	MAM domain||EGF-like calcium-binding, conserved site||EGF-like calcium-binding domain||EGF-like domain||Concanavalin A-like lectin/glucanase domain||EGF-like, conserved site||EGF-type aspartate/asparagine hydroxylation site||-||Insulin-like growth factor binding protein, N-terminal
ENSG00000101213	PTK6	1.57167	0.986016	0.942699	1.97865	2.21899	1.38781	1.16679	1.86182	1.59567	0.04774	0.58256	Protein kinase-like domain||Serine-threonine/tyrosine-protein kinase catalytic domain||Protein kinase, ATP binding site||SH2 domain||Tyrosine-protein kinase, active site||Tyrosine-protein kinase, catalytic domain||Protein kinase domain||SH3 domain
ENSG00000151117	TMEM86A	6.18024	6.95972	7.50972	8.96319	11.511	12.4716	6.88323	10.9819	1.59546	4.4205e-05	0.0039576	YhhN-like
ENSG00000235027	--	0.572905	0.369219	0.75416	0.793305	0.914003	0.997432	0.565428	0.90158	1.59451	0.048608	0.588	--
ENSG00000164683	HEY1	7.31483	6.69281	4.78846	9.50118	11.4309	9.0255	6.26537	9.98586	1.59382	0.0010956	0.045859	Orange domain||Myc-type, basic helix-loop-helix (bHLH) domain
ENSG00000172995	ARPP21	38.7182	34.0664	30.2851	59.9925	58.0618	46.1571	34.3566	54.7371	1.59321	0.00013538	0.0094146	-||R3H domain||SUZ domain
ENSG00000108840	HDAC5	28.7422	28.9605	25.6643	43.897	45.0153	43.7438	27.789	44.2187	1.59123	8.7474e-13	8.1741e-10	-||Histone deacetylase superfamily||Histone deacetylase, glutamine rich N-terminal domain||Histone deacetylase domain||Histone deacetylase class II, eukaryotic
ENSG00000165617	DACT1	37.1474	26.4898	25.4453	58.344	40.1189	43.2297	29.6942	47.2308	1.59057	0.011115	0.23826	Dapper
ENSG00000125864	BFSP1	2.76474	1.81418	2.2142	3.48032	3.49949	3.81892	2.26438	3.59958	1.58965	0.0018246	0.066922	-||Intermediate filament protein
ENSG00000145075	CCDC39	6.11749	6.63206	9.03167	10.6179	11.731	12.2631	7.26041	11.5374	1.58908	8.5912e-07	0.00017013	-
ENSG00000143603	KCNN3	3.7185	4.0758	3.17943	6.22876	6.58863	4.59195	3.65791	5.80312	1.58646	0.0026556	0.087746	Potassium channel, calcium-activated, SK||Calmodulin-binding domain||Potassium channel domain
ENSG00000115594	IL1R1	26.2425	30.6105	30.4613	38.9323	47.0175	52.4096	29.1047	46.1198	1.58461	5.1389e-06	0.00070405	Immunoglobulin-like domain||Interleukin-1 receptor type 1||Toll/interleukin-1 receptor homology (TIR) domain||Immunoglobulin I-set||-||Interleukin-1 receptor type I/II||Immunoglobulin subtype
ENSG00000221955	SLC12A8	4.37585	3.63088	2.99091	6.93028	5.91018	4.57752	3.66588	5.806	1.58379	0.01152	0.24363	Amino acid permease/ SLC12A domain||-
ENSG00000167549	CORO6	71.096	76.7849	70.1951	120.466	111.424	112.999	72.692	114.963	1.58151	2.9629e-15	5.5375e-12	WD40-repeat-containing domain||WD40 repeat||-||WD40 repeat, conserved site||Domain of unknown function DUF1899||Trimerisation motif
ENSG00000130528	HRC	47.7181	50.4372	39.6687	74.4579	87.0818	56.3863	45.9414	72.642	1.58119	0.0084655	0.19995	-||Histidine-rich calcium-binding
ENSG00000196782	MAML3	0.700913	0.686609	0.574892	0.931736	1.13856	1.0317	0.654138	1.034	1.5807	0.023881	0.38787	-||Neurogenic mastermind-like, N-terminal
ENSG00000229563	--	3.76732	3.64619	2.80352	5.05611	5.70317	5.38227	3.40568	5.38052	1.57987	8.0975e-05	0.0063975	--
ENSG00000064042	LIMCH1	3.69897	3.07624	3.06737	6.05034	5.11233	4.35857	3.28086	5.17375	1.57695	0.00066605	0.031664	Smooth muscle protein/calponin||Calponin/LIMCH1||-||Zinc finger, LIM-type||Calponin homology domain
ENSG00000205056	--	0.269587	0.270724	0.143011	0.320925	0.383409	0.369687	0.227774	0.358007	1.57177	0.013092	0.2647	--
ENSG00000091482	SMPX	28.407	31.4708	24.2207	45.2477	51.4874	35.3755	28.0328	44.0369	1.5709	0.003642	0.11147	Small muscular protein Chisel
ENSG00000173210	ABLIM3	108.689	100.061	90.374	170.26	158.91	140.406	99.7081	156.525	1.56984	2.5184e-07	5.7929e-05	-||Zinc finger, LIM-type||Villin headpiece
ENSG00000178860	MSC	8.75883	6.23254	6.60387	13.6163	9.54715	10.708	7.19841	11.2905	1.56847	0.0048347	0.13519	Myc-type, basic helix-loop-helix (bHLH) domain
ENSG00000149634	SPATA25	1.58145	2.55527	1.93023	3.58978	2.65409	3.25839	2.02232	3.16742	1.56623	0.03134	0.45681	Spermatogenesis-associated protein 25
ENSG00000171992	SYNPO	6.02034	4.93686	3.21196	8.38474	8.00623	5.72611	4.72305	7.37236	1.56093	0.03804	0.51033	-
ENSG00000166165	CKB	283.672	297.013	207.594	476.309	464.839	286.197	262.76	409.115	1.55699	0.044475	0.55916	ATP:guanido phosphotransferase active site||-||ATP:guanido phosphotransferase, catalytic domain||ATP:guanido phosphotransferase, N-terminal
ENSG00000084764	MAPRE3	28.1685	29.516	23.6655	48.1643	45.7967	32.6014	27.1166	42.1875	1.55578	0.0060891	0.15944	EB1, C-terminal||Calponin homology domain
ENSG00000187994	RINL	10.1626	10.333	8.63427	13.5227	18.8146	12.8902	9.70996	15.0758	1.55262	0.0095449	0.21788	SH2 domain||VPS9 domain
ENSG00000100678	SLC8A3	2.62181	2.89003	2.51369	3.62222	4.4753	4.35993	2.67518	4.15248	1.55223	6.7549e-06	0.00088206	Sodium/calcium exchanger membrane region||Sodium/calcium exchanger protein||Na-Ca exchanger/integrin-beta4||-
ENSG00000134769	DTNA	2.92328	2.43333	2.34888	4.11586	4.3401	3.50451	2.56849	3.98682	1.5522	0.00085538	0.038064	EF-hand domain, type 2||-||EF-hand domain, type 1||Zinc finger, ZZ-type||Distrobrevin
ENSG00000172164	SNTB1	61.3505	59.7382	51.6839	94.9806	92.137	80.7621	57.5909	89.2932	1.55047	5.2497e-08	1.5543e-05	-||Pleckstrin homology domain||PDZ domain
ENSG00000228409	--	2.03115	1.64936	1.5734	2.99536	2.6071	2.53163	1.7513	2.71136	1.5482	0.01923	0.33766	--
ENSG00000149380	P4HA3	8.18904	8.8211	10.7376	12.9825	13.2343	16.7237	9.24923	14.3135	1.54754	2.6141e-05	0.0025629	Prolyl 4-hydroxylase, alpha subunit||-||Prolyl 4-hydroxylase alpha-subunit, N-terminal||Oxoglutarate/iron-dependent dioxygenase
ENSG00000119950	MXI1	10.4569	9.88169	8.84548	14.3587	16.1085	14.6717	9.72801	15.0463	1.5467	4.268e-07	9.1161e-05	Myc-type, basic helix-loop-helix (bHLH) domain
ENSG00000262601	--	5.39261	6.63866	5.19031	6.92619	11.205	8.46539	5.74053	8.86553	1.54438	0.021164	0.35893	--
ENSG00000281183	--	0.692931	0.76038	0.614427	1.14363	1.14895	0.900352	0.689246	1.06431	1.54416	0.047924	0.58326	--
ENSG00000251144	--	11.471	11.9244	12.8299	18.3801	16.529	21.0086	12.0751	18.6392	1.54361	0.002293	0.078543	--
ENSG00000178573	MAF	4.69362	5.00921	4.43146	6.81644	7.46633	7.50154	4.71143	7.26144	1.54124	1.9615e-07	4.8077e-05	Basic leucine zipper domain, Maf-type||Basic-leucine zipper domain||Maf transcription factor, N-terminal||Transcription factor, Skn-1-like, DNA-binding domain
ENSG00000279484	--	0.633214	0.654713	0.564527	0.874909	1.02419	0.955911	0.617485	0.951671	1.54121	0.026997	0.41836	--
ENSG00000189320	FAM180A	0.752852	1.31001	1.62949	2.11102	1.71974	1.8432	1.23079	1.89132	1.53668	0.0242	0.3918	-||FAM180 family
ENSG00000175287	PHYHD1	8.86845	9.39115	8.89779	12.8773	13.7533	15.0811	9.05246	13.9039	1.53592	9.8509e-06	0.0011597	-||Phytanoyl-CoA dioxygenase
ENSG00000260139	--	1.01837	0.67246	0.556846	1.26912	1.02253	1.15492	0.749224	1.14886	1.5334	0.032461	0.46803	--
ENSG00000146072	TNFRSF21	4.42423	3.9596	3.12153	6.68454	6.28731	4.66308	3.83512	5.87831	1.53276	0.0092983	0.21388	TNFR/NGFR cysteine-rich region||Death-like domain||Death domain||Tumour necrosis factor receptor 21
ENSG00000110002	VWA5A	2.12055	2.79991	2.14464	3.56657	3.5106	3.73895	2.35503	3.60537	1.53092	0.00027892	0.016681	VIT domain||von Willebrand factor, type A
ENSG00000204219	TCEA3	30.3133	30.8737	22.5909	47.5362	42.9546	37.7227	27.926	42.7378	1.5304	0.0003884	0.021194	Transcription elongation factor, TFIIS-related||Transcription elongation factor, TFIIS/CRSP70, N-terminal, sub-type||Transcription factor IIS, N-terminal||Transcription elongation factor S-II, central domain||Transcription elongation factor S-IIM||Zinc finger, TFIIS-type||Transcription elongation factor, TFIIS
ENSG00000078328	RBFOX1	41.2499	40.0176	34.5257	62.1832	64.5056	50.4796	38.5977	59.0562	1.53004	9.4095e-05	0.0071596	RNA recognition motif domain||RNA binding protein Fox-1||Fox-1 C-terminal domain
ENSG00000227051	--	32.8999	32.3459	25.5404	48.3574	46.7625	43.6515	30.2621	46.2571	1.52855	8.8958e-08	2.3541e-05	--
ENSG00000197177	ADGRA1	0.878478	0.758884	0.536566	1.17632	1.19548	0.948502	0.724643	1.10677	1.52733	0.0089092	0.20732	GPCR, family 2, secretin-like, conserved site||GPCR, family 2, secretin-like||GPCR, family 2-like
ENSG00000118804	FAM47E-STBD1	0.475063	0.696119	0.769044	1.05944	0.913841	0.988351	0.646742	0.987211	1.52644	0.013562	0.26985	Carbohydrate-binding-like fold||Carbohydrate binding module family 20
ENSG00000171310	CHST11	3.22169	2.85049	3.20975	4.62744	4.60922	4.91975	3.09398	4.71881	1.52516	9.0871e-05	0.0069854	-||Sulfotransferase
ENSG00000225511	--	5.5723	4.4101	3.55952	7.39871	7.68147	5.56368	4.51397	6.88129	1.52444	0.014557	0.28029	--
ENSG00000130433	CACNG6	7.10527	7.66653	6.02288	10.4789	13.2841	7.92236	6.93156	10.5618	1.52372	0.036941	0.50279	PMP-22/EMP/MP20/Claudin superfamily||Voltage-dependent calcium channel, gamma subunit||Voltage-dependent calcium channel, gamma-6 subunit
ENSG00000035664	DAPK2	2.98514	3.05389	3.21316	4.33534	4.11132	5.65009	3.08406	4.69892	1.52361	0.00027032	0.016262	Serine/threonine-protein kinase, active site||-||Serine/threonine/dual specificity protein kinase, catalytic domain||Protein kinase domain||Protein kinase-like domain||Protein kinase, ATP binding site
ENSG00000171223	JUNB	12.0045	11.8001	11.561	18.8249	14.627	20.3793	11.7885	17.9438	1.52214	7.3697e-05	0.0059722	Transcription factor Jun||Jun-like transcription factor||Basic-leucine zipper domain||Transcription factor, Skn-1-like, DNA-binding domain
ENSG00000152137	HSPB8	70.9129	72.9826	56.315	115.689	113.29	75.1185	66.7368	101.366	1.51889	0.022734	0.37628	Alpha crystallin/Hsp20 domain||Alpha crystallin/Heat shock protein||HSP20-like chaperone
ENSG00000196196	HRCT1	2.07028	2.66266	2.52247	3.36528	3.23108	4.42354	2.41847	3.6733	1.51886	0.013259	0.26586	-
ENSG00000152061	RABGAP1L	13.049	11.7273	12.0554	19.8957	18.2184	17.8218	12.2772	18.6453	1.51869	6.67e-08	1.8298e-05	Rab-GTPase-TBC domain||Kinesin-like||PTB/PI domain||-
ENSG00000005513	SOX8	25.4563	34.544	25.6935	38.7531	48.4479	42.8618	28.5646	43.3543	1.51776	0.00034718	0.019549	Sox developmental protein N-terminal||High mobility group box domain
ENSG00000198959	TGM2	19.7211	13.9082	16.828	28.1737	23.6726	24.7231	16.8191	25.5231	1.51751	3.6e-05	0.0033123	Protein-glutamine gamma-glutamyltransferase, eukaryota||Transglutaminase, C-terminal||Transglutaminase, conserved site||Transglutaminase, N-terminal||Immunoglobulin E-set||Transglutaminase-like
ENSG00000161664	ASB16	0.761403	0.747374	1.52123	1.75179	1.52903	1.31402	1.01	1.53161	1.51644	0.043208	0.54887	SOCS box domain||-||Ankyrin repeat-containing domain||Ankyrin repeat
ENSG00000230630	--	1.51087	1.18363	1.07292	2.42087	1.61359	1.66654	1.25581	1.90033	1.51324	0.033174	0.47487	--
ENSG00000164949	GEM	1.57341	1.98394	1.49625	1.96084	3.08069	2.5945	1.68453	2.54534	1.51101	0.0273	0.42001	Small GTP-binding protein domain||Small GTPase superfamily||Small GTPase superfamily, GEM/REM/Rad||Small GTPase superfamily, Rho type||Small GTPase superfamily, Ras type||-||P-loop containing nucleoside triphosphate hydrolase||Small GTPase superfamily, Rab type
ENSG00000078098	FAP	21.9699	20.488	28.3245	35.2082	31.9832	39.6343	23.5941	35.6086	1.50921	9.6647e-06	0.0011468	Peptidase S9, serine active site||Alpha/Beta hydrolase fold||Dipeptidylpeptidase IV, N-terminal domain||-||Peptidase S9, prolyl oligopeptidase, catalytic domain
ENSG00000088448	ANKRD10	354.815	398.973	383.163	508.054	615.955	590.905	378.984	571.638	1.50834	1.1865e-08	4.4351e-06	Ankyrin repeat-containing domain||-||Ankyrin repeat
ENSG00000250067	YJEFN3	1.87211	2.17173	1.76885	2.64188	3.27023	2.85303	1.93756	2.92171	1.50793	0.0098637	0.2216	YjeF N-terminal domain||-
ENSG00000262454	--	7.49929	5.76201	5.85805	8.86038	11.1873	8.74018	6.37312	9.59597	1.50569	0.016415	0.30584	--
ENSG00000187486	KCNJ11	3.46056	2.92639	2.25478	4.87695	4.81263	3.317	2.88057	4.33552	1.50509	0.032238	0.4663	Immunoglobulin E-set||Potassium channel, inwardly rectifying, Kir6.2||Potassium channel, inwardly rectifying, Kir
ENSG00000129422	MTUS1	1.32611	1.24659	1.25021	1.82361	1.96975	1.95413	1.27431	1.91583	1.50343	0.020416	0.35086	-
ENSG00000175471	MCTP1	1.83448	1.50384	2.34057	2.56054	2.61807	3.34483	1.89297	2.84115	1.5009	0.0043875	0.12689	C2 domain||Phosphoribosyltransferase C-terminal
ENSG00000167191	GPRC5B	71.7548	66.8016	62.9607	112.019	98.5108	91.9142	67.1723	100.815	1.50084	8.043e-07	0.00016034	-||GPCR, family 3, C-terminal
ENSG00000119681	LTBP2	113.813	96.2064	101.69	165.533	137.952	164.31	103.903	155.932	1.50074	4.8656e-08	1.455e-05	EGF-like calcium-binding domain||EGF-like calcium-binding, conserved site||EGF-like domain||TB domain||EGF-like, conserved site||EGF-type aspartate/asparagine hydroxylation site||-||Insulin-like growth factor binding protein, N-terminal
ENSG00000178531	CTXN1	3.22178	3.97099	3.76192	2.84403	2.40936	2.04367	3.65156	2.43235	-1.50125	0.016137	0.30197	Cortexin
ENSG00000149554	CHEK1	11.508	11.1141	14.2261	8.54323	6.68421	9.2944	12.2827	8.17395	-1.50267	0.0011613	0.047967	Serine/threonine/dual specificity protein kinase, catalytic domain||Protein kinase domain||Protein kinase-like domain||Protein kinase, ATP binding site||-||Serine/threonine-protein kinase, active site
ENSG00000138134	STAMBPL1	4.87527	6.30616	7.96205	4.00568	3.97031	4.74755	6.38116	4.24118	-1.50457	0.03231	0.4663	USP8 dimerisation domain||JAB1/MPN/MOV34 metalloenzyme domain
ENSG00000177570	SAMD12	2.3446	2.46325	1.8142	1.51609	1.4436	1.44146	2.20735	1.46705	-1.50461	0.016308	0.30426	-||Sterile alpha motif domain||Sterile alpha motif/pointed domain
ENSG00000105339	DENND3	3.91096	4.32421	5.51338	3.097	2.5791	3.46011	4.58285	3.0454	-1.50484	0.0068771	0.17252	WD40-repeat-containing domain||WD40 repeat||-||WD40 repeat, conserved site||DENN domain||uDENN domain||dDENN domain
ENSG00000159399	HK2	5.26741	6.24044	5.37746	3.95263	4.02297	3.24474	5.62844	3.74011	-1.50488	2.033e-05	0.0020819	Hexokinase, N-terminal||Hexokinase, binding site||Hexokinase, C-terminal
ENSG00000111206	FOXM1	20.1418	19.5003	21.1574	12.4034	12.6266	15.3408	20.2665	13.4569	-1.50603	4.8029e-07	0.00010114	-||Fork head domain conserved site1||Fork head domain
ENSG00000105419	MEIS3	7.74604	9.19801	8.04589	6.00486	4.4584	6.12513	8.32998	5.52946	-1.50647	0.00054135	0.027116	Homeobox KN domain||Homeodomain-like||-||Homeobox domain
ENSG00000280734	--	1.97918	1.91852	1.70487	1.21637	1.16786	1.33239	1.86752	1.23887	-1.50744	0.048083	0.58437	--
ENSG00000093009	CDC45	9.45748	9.14258	10.235	5.59847	5.24662	8.25148	9.61169	6.36552	-1.50996	0.0019514	0.069717	CDC45 family||-
ENSG00000134531	EMP1	296.156	289.714	379.398	196.117	184.181	258.682	321.756	212.993	-1.51064	0.0042282	0.12311	PMP-22/EMP/MP20||-||Epithelial membrane protein EMP-1||PMP-22/EMP/MP20/Claudin superfamily
ENSG00000101282	RSPO4	49.6614	51.1891	53.3013	30.5099	30.0363	41.4164	51.3839	33.9875	-1.51185	9.3506e-06	0.0011184	Insulin-like growth factor binding protein, N-terminal||Furin-like repeat||Thrombospondin type-1 (TSP1) repeat
ENSG00000112029	FBXO5	5.28609	5.50372	7.86448	3.74778	3.90106	4.68951	6.2181	4.11279	-1.51189	0.022239	0.37069	F-box domain
ENSG00000104884	ERCC2	52.3319	53.3223	58.4105	37.5843	33.3097	37.6086	54.6882	36.1675	-1.51208	4.1842e-09	1.955e-06	Xeroderma pigmentosum group D protein||Helical and beta-bridge domain||Helicase-like, DEXD box c2 type||P-loop containing nucleoside triphosphate hydrolase||DNA helicase (DNA repair), Rad3 type||DEAD2||DNA/RNA helicase, ATP-dependent, DEAH-box type, conserved site||-||Helicase superfamily 1/2, ATP-binding domain, DinG/Rad3-type||ATP-dependent helicase, C-terminal
ENSG00000103647	CORO2B	4.32416	4.4385	6.14361	2.92152	2.83804	4.08765	4.96876	3.2824	-1.51376	0.026721	0.41705	Domain of unknown function DUF1899||WD40 repeat, conserved site||Trimerisation motif||WD40 repeat||WD40-repeat-containing domain
ENSG00000075702	WDR62	5.65784	5.87999	6.17995	3.44867	3.4691	4.78586	5.90593	3.90121	-1.51387	5.6329e-05	0.0047853	WD40-repeat-containing domain||-||WD40 repeat||Quinonprotein alcohol dehydrogenase-like superfamily
ENSG00000183873	SCN5A	52.3076	52.3262	53.6648	34.0894	33.9849	36.4727	52.7662	34.849	-1.51414	3.1056e-11	2.1106e-08	-||Voltage-gated Na+ ion channel, cytoplasmic domain||Sodium ion transport-associated||Ion transport domain||Voltage gated sodium channel, alpha subunit||Voltage gated sodium channel, alpha-5 subunit
ENSG00000185480	PARPBP	3.70685	2.85692	4.06077	1.93011	2.28674	2.79384	3.54151	2.33689	-1.51548	0.0084056	0.19905	-||P-loop containing nucleoside triphosphate hydrolase
ENSG00000123473	STIL	4.45286	5.06985	5.65498	3.69954	2.47564	3.83218	5.05923	3.33579	-1.51665	0.0033142	0.1041	SCL-interrupting locus protein||-
ENSG00000173894	CBX2	7.09528	7.89875	7.60291	4.76521	4.53737	5.59231	7.53231	4.96496	-1.51709	9.2925e-05	0.0071068	Chromo domain subgroup||Chromo domain||Chromo domain, conserved site||Chromo/chromo shadow domain||Chromo domain-like
ENSG00000073111	MCM2	28.8207	27.5128	30.8482	18.894	17.7324	20.7675	29.0606	19.1313	-1.51901	6.5696e-08	1.8292e-05	DNA replication licensing factor Mcm2||Mini-chromosome maintenance protein||MCM domain||-||Mini-chromosome maintenance, conserved site||P-loop containing nucleoside triphosphate hydrolase||MCM N-terminal domain||Nucleic acid-binding, OB-fold
ENSG00000070950	RAD18	11.8488	9.43944	15.8071	6.71605	8.19907	9.45585	12.3651	8.12366	-1.52211	0.045196	0.56431	SAP domain||-||Zinc finger, RING-type||Zinc finger, Rad18-type putative||Zinc finger, C3HC4 RING-type||Zinc finger, RING-type, conserved site
ENSG00000079616	KIF22	17.8338	17.4647	22.4798	11.3069	11.3248	15.3269	19.2594	12.6529	-1.52214	0.0019919	0.070485	P-loop containing nucleoside triphosphate hydrolase||RuvA domain 2-like||Helix-hairpin-helix DNA-binding motif, class 1||-||Kinesin motor domain||Kinesin motor domain, conserved site
ENSG00000163808	KIF15	3.00462	2.91038	4.12787	1.85351	2.05903	2.66427	3.34762	2.19227	-1.52701	0.016969	0.31206	-||Kinesin motor domain||P-loop containing nucleoside triphosphate hydrolase||Kinesin-like, KLP2
ENSG00000144283	PKP4	29.7182	30.4608	30.3826	22.5585	17.347	19.3874	30.1872	19.7643	-1.52736	1.1068e-08	4.1894e-06	Armadillo||-||Armadillo-type fold
ENSG00000175832	ETV4	17.0716	18.7728	23.0019	11.3061	11.2019	16.0118	19.6154	12.8399	-1.52769	0.0065574	0.16731	PEA3-type ETS-domain transcription factor, N-terminal||Ets domain
ENSG00000177602	GSG2	1.63563	1.82647	2.02696	1.33352	0.917855	1.33914	1.82969	1.19684	-1.52876	0.013063	0.26445	Domain of unknown function DUF3635||Protein kinase domain||Serine/threonine/dual specificity protein kinase, catalytic domain||Protein kinase, ATP binding site||Protein kinase-like domain
ENSG00000163909	HEYL	132.495	160.054	142.439	91.8819	96.2529	95.7351	144.996	94.6233	-1.53235	3.2121e-08	1.0555e-05	Orange domain||Myc-type, basic helix-loop-helix (bHLH) domain
ENSG00000225383	--	27.1886	27.2126	30.0082	16.1818	19.5708	19.3135	28.1365	18.3553	-1.53288	3.5017e-05	0.003262	--
ENSG00000152779	SLC16A12	2.82853	2.66099	3.51297	2.04193	1.80104	2.02685	3.00083	1.95661	-1.53369	0.0028441	0.092444	Major facilitator superfamily||-||Major facilitator superfamily domain
ENSG00000145632	PLK2	221.487	245.081	244.695	162.923	144.965	155.515	237.088	154.468	-1.53487	1.4809e-11	1.0801e-08	POLO box duplicated domain||Serine/threonine-protein kinase, active site||Protein kinase, ATP binding site||Protein kinase-like domain||Protein kinase domain||Serine/threonine/dual specificity protein kinase, catalytic domain
ENSG00000138587	MNS1	3.87206	4.01894	4.73596	2.74291	2.34092	3.13518	4.20899	2.73967	-1.53631	0.018658	0.33216	-
ENSG00000168496	FEN1	28.7265	25.5742	33.3333	16.7344	19.0973	21.1974	29.2113	19.0097	-1.53665	5.479e-05	0.0046811	PIN domain-like||XPG conserved site||Helix-hairpin-helix motif, class 2||XPG N-terminal||XPG-I domain||5'-3' exonuclease, C-terminal domain||XPG/Rad2 endonuclease
ENSG00000125266	EFNB2	14.4723	16.1326	17.1241	9.97352	9.74572	11.3247	15.9097	10.348	-1.53746	4.6739e-09	2.0574e-06	Ephrin receptor-binding domain||Cupredoxin||Ephrin, conserved site
ENSG00000138376	BARD1	5.66276	5.4889	6.4422	3.81274	3.64623	3.97905	5.86462	3.81267	-1.53819	0.00013971	0.0096304	Ankyrin repeat||Zinc finger, RING-type||-||Ankyrin repeat-containing domain||Zinc finger, RING-type, conserved site||BRCT domain
ENSG00000179958	DCTPP1	17.9849	15.5236	20.9528	11.7685	11.707	11.8631	18.1538	11.7795	-1.54113	3.54e-05	0.0032758	NTP pyrophosphohydrolase MazG, putative catalytic core||EAR||-
ENSG00000198576	ARC	1.73265	1.35967	1.49776	1.07965	0.997788	0.898313	1.53003	0.991915	-1.5425	0.045785	0.56949	Activity-regulated cytoskeleton-associated protein
ENSG00000163462	TRIM46	1.45628	1.61342	1.52102	1.14194	0.747545	1.08382	1.53024	0.991102	-1.54398	0.019771	0.34347	Zinc finger, C3HC4 RING-type||Zinc finger, RING-type, conserved site||Fibronectin type III||B-box-type zinc finger||B30.2/SPRY domain||Concanavalin A-like lectin/glucanase domain||Zinc finger, RING-type||COS domain
ENSG00000115884	SDC1	3.76019	3.32487	3.954	2.22835	2.47127	2.44402	3.67969	2.38121	-1.5453	0.0044223	0.12741	-||Syndecan/Neurexin domain||Neurexin/syndecan/glycophorin C||Syndecan, conserved site
ENSG00000125968	ID1	2.64824	3.25017	3.46277	1.67408	1.75344	2.62422	3.12039	2.01725	-1.54686	0.037471	0.50649	Myc-type, basic helix-loop-helix (bHLH) domain
ENSG00000112118	MCM3	24.0587	24.3976	28.6692	14.1038	16.451	19.2561	25.7085	16.6037	-1.54837	1.1261e-05	0.0012707	Nucleic acid-binding, OB-fold||MCM N-terminal domain||P-loop containing nucleoside triphosphate hydrolase||Mini-chromosome maintenance, conserved site||-||DNA replication licensing factor Mcm3||MCM domain||Mini-chromosome maintenance protein||AAA+ ATPase domain
ENSG00000113810	SMC4	56.9889	47.156	62.899	32.6069	32.2472	42.9486	55.6813	35.9342	-1.54953	0.00060104	0.029177	RecF/RecN/SMC, N-terminal||Structural maintenance of chromosomes protein||P-loop containing nucleoside triphosphate hydrolase||-||SMCs flexible hinge
ENSG00000163507	KIAA1524	10.8409	9.35554	13.3515	6.86879	6.63896	8.13975	11.1826	7.21583	-1.54974	0.001543	0.059003	Armadillo-type fold||-
ENSG00000164611	PTTG1	33.9251	33.2602	41.7918	23.1244	19.5516	27.5858	36.3257	23.4206	-1.55101	0.00034067	0.019352	Securin sister-chromatid separation inhibitor
ENSG00000165304	MELK	14.0288	12.5362	18.161	8.67983	8.44423	11.7041	14.9087	9.6094	-1.55147	0.0096074	0.21854	Serine/threonine-protein kinase, active site||Serine/threonine/dual specificity protein kinase, catalytic domain||Protein kinase, ATP binding site||Protein kinase-like domain||Kinase associated domain 1 (KA1)||-||KA1 domain/Ssp2 C-terminal domain||Protein kinase domain
ENSG00000011332	DPF1	9.26769	7.28177	9.26901	5.60881	5.29495	5.69391	8.60615	5.53256	-1.55555	9.8635e-05	0.007337	Zinc finger, PHD-finger||Zinc finger, FYVE/PHD-type||-||Zinc finger, C2H2||Requiem/DPF N-terminal domain||Zinc finger, C2H2-like||Zinc finger, PHD-type
ENSG00000003989	SLC7A2	4.42617	4.80794	6.20276	2.66826	3.23918	4.01517	5.14562	3.30754	-1.55573	0.0083142	0.19781	Cationic amino acid transport permease||Amino acid/polyamine transporter I||Cationic amino acid transporter, C-terminal
ENSG00000099960	SLC7A4	2.01173	2.83589	2.19308	1.74544	1.66199	1.11542	2.3469	1.50762	-1.55669	0.013563	0.26985	Amino acid/polyamine transporter I||Cationic amino acid transporter, C-terminal||-
ENSG00000166451	CENPN	9.79426	8.73982	10.2991	6.10297	5.21217	7.20382	9.61106	6.17299	-1.55695	0.00030279	0.017788	Centromere protein Chl4/mis15/CENP-N||-
ENSG00000168077	SCARA3	3.81804	4.30098	4.57227	2.41841	1.95642	3.77559	4.23043	2.71681	-1.55713	0.018725	0.3327	Collagen triple helix repeat||-
ENSG00000149177	PTPRJ	5.24863	4.22442	5.4215	3.93197	2.65577	2.97694	4.96485	3.18822	-1.55725	0.0010057	0.043087	Tyrosine specific protein phosphatases domain||-||Protein-tyrosine phosphatase, active site||PTP type protein phosphatase||Protein-tyrosine phosphatase-like||Protein-tyrosine phosphatase, catalytic||Fibronectin type III
ENSG00000183287	CCBE1	28.0433	25.9704	36.5276	18.2174	18.0792	21.773	30.1804	19.3565	-1.55919	0.0016956	0.063391	EGF-type aspartate/asparagine hydroxylation site||EGF-like, conserved site||EGF-like calcium-binding domain||EGF-like calcium-binding, conserved site||EGF-like domain||-||Collagen triple helix repeat
ENSG00000109743	BST1	7.6741	9.18946	9.7654	4.8039	5.6779	6.57398	8.87632	5.68526	-1.56129	0.0003829	0.020932	ADP-ribosyl cyclase (CD38/157)
ENSG00000089685	BIRC5	57.2037	60.1749	68.8503	34.8657	37.4303	46.9347	62.0763	39.7436	-1.56192	8.5056e-06	0.0010297	BIR repeat||-
ENSG00000189221	MAOA	1.35956	1.46838	1.49536	1.0906	0.938319	0.734585	1.4411	0.921169	-1.56442	0.013174	0.26545	Flavin amine oxidase||Amine oxidase
ENSG00000145386	CCNA2	15.2251	14.2926	19.9143	9.6585	10.5154	11.4154	16.4773	10.5298	-1.56483	0.00094629	0.041189	Cyclin, N-terminal||Cyclin-like||Cyclin, C-terminal domain
ENSG00000137507	LRRC32	1.44906	1.66119	1.44487	0.849819	0.912358	1.14741	1.51837	0.969862	-1.56556	0.018661	0.33216	Leucine-rich repeat, ribonuclease inhibitor subtype||Leucine-rich repeat||Leucine-rich repeat N-terminal domain||Leucine-rich repeat, typical subtype
ENSG00000111665	CDCA3	19.0127	15.3646	19.5659	11.1055	9.48086	13.824	17.9811	11.4701	-1.56764	0.00037639	0.02069	-
ENSG00000139880	CDH24	2.70879	3.62437	3.78709	1.99478	1.74782	2.71305	3.37341	2.15188	-1.56766	0.011218	0.23943	Cadherin-like||Cadherin||Cadherin conserved site||Cadherin, cytoplasmic domain
ENSG00000148154	UGCG	157.5	153.829	183.619	104.178	96.075	115.363	164.983	105.205	-1.5682	3.4697e-09	1.6628e-06	Nucleotide-diphospho-sugar transferases||Ceramide glucosyltransferase
ENSG00000127824	TUBA4A	20.9483	21.9278	27.5178	11.6765	15.4344	17.7466	23.4646	14.9525	-1.56927	0.0022174	0.076435	Tubulin/FtsZ, GTPase domain||Tubulin/FtsZ, C-terminal||Tubulin/FtsZ, 2-layer sandwich domain||Alpha tubulin||Tubulin, conserved site||Tubulin
ENSG00000259479	--	3.5845	3.03435	4.0613	2.69638	1.72824	2.38049	3.56005	2.26837	-1.56943	0.0095645	0.21799	--
ENSG00000163918	RFC4	13.4404	11.0611	18.1651	9.03863	7.81202	10.2951	14.2222	9.04859	-1.57176	0.023781	0.38743	-||ATPase, AAA-type, core||P-loop containing nucleoside triphosphate hydrolase||AAA+ ATPase domain||DNA polymerase III, clamp loader complex, gamma/delta/delta subunit, C-terminal||Replication factor C, C-terminal
ENSG00000198113	TOR4A	3.89625	4.40025	5.4812	2.32506	2.77164	3.667	4.59257	2.92123	-1.57213	0.0097086	0.2196	Torsin||P-loop containing nucleoside triphosphate hydrolase||AAA+ ATPase domain
ENSG00000074527	NTN4	57.78	73.1838	71.0496	39.3728	41.9873	47.0886	67.3378	42.8162	-1.57272	1.1068e-05	0.0012659	Laminin EGF domain||Netrin module, non-TIMP type||Laminin, N-terminal||Tissue inhibitor of metalloproteinases-like, OB-fold||Netrin domain
ENSG00000097046	CDC7	5.04929	5.04144	6.18127	3.31849	2.75441	4.24036	5.424	3.43775	-1.57778	0.00073814	0.034115	Serine/threonine-protein kinase, active site||Protein kinase-like domain||Protein kinase, ATP binding site||Serine/threonine/dual specificity protein kinase, catalytic domain||Protein kinase domain
ENSG00000198056	PRIM1	3.73264	3.03664	4.77121	2.41649	2.15139	2.74481	3.84683	2.43757	-1.57815	0.027586	0.42173	DNA primase, small subunit||-||DNA primase, small subunit, eukaryotic/archaeal
ENSG00000101333	PLCB4	13.0642	9.88431	11.2605	9.7225	5.37615	6.51876	11.403	7.2058	-1.58248	0.0096986	0.2196	-||PLC-like phosphodiesterase, TIM beta/alpha-barrel domain||Phosphatidylinositol-specific phospholipase C, X domain||Phospholipase C, phosphatidylinositol-specific, Y domain||Phosphoinositide phospholipase C family||C2 domain||Phosphoinositide-specific p
ENSG00000239713	APOBEC3G	1.95989	1.85382	2.59674	1.91641	1.10202	1.03081	2.13682	1.34975	-1.58312	0.040245	0.52829	APOBEC-like, N-terminal||APOBEC/CMP deaminase, zinc-binding||Cytidine deaminase-like
ENSG00000157456	CCNB2	21.1267	19.0315	27.5989	11.8084	11.4504	19.4945	22.5857	14.2511	-1.58484	0.03445	0.48592	Cyclin, C-terminal domain||Cyclin-like||Cyclin, N-terminal
ENSG00000267102	--	4.09146	4.19254	4.75409	1.8696	3.29339	3.05976	4.34603	2.74092	-1.58561	0.039554	0.5229	--
ENSG00000150938	CRIM1	362.88	364.591	410.172	241.718	211.367	264.119	379.214	239.068	-1.58622	3.0946e-12	2.6126e-09	Antistasin-like domain||Hirudin/antistatin||VWFC domain||VWC out||Insulin-like growth factor binding protein, N-terminal||Insulin-like growth factor-binding protein, IGFBP
ENSG00000110427	KIAA1549L	0.975154	1.18699	1.17345	0.838708	0.654369	0.60894	1.11186	0.700672	-1.58685	0.0013391	0.053676	Protein of unknown function DUF3827
ENSG00000166803	KIAA0101	23.8436	19.8838	28.9946	11.9336	14.2493	19.642	24.2407	15.275	-1.58696	0.013436	0.2682	-
ENSG00000161888	SPC24	14.0686	14.7785	18.9813	10.1085	8.49406	11.4562	15.9428	10.0196	-1.59117	0.00086442	0.038408	Kinetochore-Ndc80 subunit Spc24||-
ENSG00000104738	MCM4	61.8325	60.8356	75.6467	38.3901	38.6113	47.6207	66.1049	41.5407	-1.59133	7.3953e-06	0.00095445	Mini-chromosome maintenance protein||MCM domain||P-loop containing nucleoside triphosphate hydrolase||-||Mini-chromosome maintenance, conserved site||Nucleic acid-binding, OB-fold||Mini-chromosome maintenance complex protein 4||MCM N-terminal domain
ENSG00000139618	BRCA2	2.33135	1.53685	2.57545	1.17932	1.26891	1.59918	2.14788	1.34914	-1.59204	0.021263	0.35977	BRCA2, oligonucleotide/oligosaccharide-binding 3||Nucleic acid-binding, OB-fold||BRCA2 repeat||Breast cancer type 2 susceptibility protein, helical domain||-||BRCA2, oligonucleotide/oligosaccharide-binding 1||Breast cancer type 2 susceptibility protein||Tower
ENSG00000123374	CDK2	12.2113	10.8591	14.5676	6.33753	7.44128	9.86226	12.546	7.88036	-1.59206	0.0023405	0.079712	Protein kinase-like domain||Protein kinase, ATP binding site||Serine/threonine/dual specificity protein kinase, catalytic domain||Protein kinase domain||-||Serine/threonine-protein kinase, active site
ENSG00000164761	TNFRSF11B	4.34853	4.06267	5.86468	2.61872	3.2381	3.08676	4.75863	2.98119	-1.59622	0.0028017	0.091462	Death-like domain||TNFR/NGFR cysteine-rich region||Tumour necrosis factor receptor 11B||-||Tumour necrosis factor receptor 11||Death domain
ENSG00000035499	DEPDC1B	4.61958	5.01686	5.59841	2.77647	2.35213	4.41027	5.07828	3.17962	-1.59713	0.010716	0.23306	Rho GTPase activation protein||Rho GTPase-activating protein domain||DEP domain||-
ENSG00000251669	--	3.07253	2.81125	2.60292	1.34827	1.97706	1.988	2.8289	1.77111	-1.59724	0.028473	0.4298	--
ENSG00000178878	APOLD1	1.7564	1.99869	2.49247	1.08402	1.20091	1.62625	2.08252	1.30372	-1.59736	0.0067386	0.16986	-||Apolipoprotein L
ENSG00000261061	--	5.73261	5.68027	6.93858	3.86976	3.27375	4.33812	6.11716	3.82721	-1.59833	0.010247	0.22791	--
ENSG00000144810	COL8A1	81.5651	72.2265	78.5155	50.3609	43.4173	51.5562	77.4357	48.4448	-1.59843	5.4458e-13	5.4282e-10	Collagen triple helix repeat||-||C1q domain||Tumour necrosis factor-like domain
ENSG00000138092	CENPO	7.78163	7.92372	7.35763	4.95662	4.42978	5.03426	7.68766	4.80689	-1.5993	8.4433e-06	0.0010297	Centromere protein O
ENSG00000160957	RECQL4	10.1449	11.3774	13.5749	6.76072	6.04104	9.13557	11.6991	7.31244	-1.59988	0.0021042	0.07325	DEAD/DEAH box helicase domain||DNA helicase, ATP-dependent, RecQ type||DNA replication/checkpoint protein||P-loop containing nucleoside triphosphate hydrolase||Helicase superfamily 1/2, ATP-binding domain||Helicase, C-terminal||-
ENSG00000152953	STK32B	4.81818	4.23115	4.1858	2.94617	2.43928	2.88644	4.41171	2.7573	-1.60001	0.00033421	0.019196	-||Serine/threonine-protein kinase, active site||Protein kinase-like domain||Protein kinase, ATP binding site||Serine/threonine/dual specificity protein kinase, catalytic domain||Protein kinase domain
ENSG00000060140	STYK1	6.04106	5.4868	5.24938	3.91019	3.42315	3.15192	5.59241	3.49509	-1.60008	0.0030792	0.098269	Protein kinase-like domain||Serine-threonine/tyrosine-protein kinase catalytic domain||Tyrosine-protein kinase, active site||Protein kinase domain||-
ENSG00000100526	CDKN3	16.0484	13.6847	20.7103	10.7463	8.59812	12.1552	16.8145	10.4999	-1.6014	0.0075268	0.18409	Protein-tyrosine phosphatase, catalytic||Cyclin-dependent kinase inhibitor 3||Tyrosine specific protein phosphatases domain||CDKN3 domain||Protein-tyrosine phosphatase-like
ENSG00000093072	CECR1	1.40129	1.20972	1.2028	1.09654	0.723143	0.557047	1.27127	0.792243	-1.60465	0.012326	0.25454	Adenosine/AMP deaminase N-terminal||Adenosine deaminase-related growth factor||Adenosine/AMP deaminase domain
ENSG00000144959	NCEH1	27.8952	28.1038	37.2316	17.1924	18.9342	21.9449	31.0769	19.3571	-1.60545	0.00049439	0.025271	-||Alpha/beta hydrolase fold-3||Alpha/Beta hydrolase fold||Arylacetamide deacetylase||Lipase, GDXG, active site
ENSG00000141449	GREB1L	0.891673	1.01714	1.03608	0.574137	0.640152	0.619199	0.981632	0.611163	-1.60617	0.030171	0.44797	-
ENSG00000159176	CSRP1	118.931	115.931	131.184	75.1912	72.7923	79.8434	122.016	75.9423	-1.60669	1.1472e-13	1.4294e-10	-||Zinc finger, LIM-type
ENSG00000198826	ARHGAP11A	26.1881	21.8351	31.225	15.6383	13.2462	20.4394	26.4161	16.4413	-1.60669	0.0045175	0.12915	-||Rho GTPase-activating protein domain||Rho GTPase activation protein
ENSG00000146918	NCAPG2	20.4942	21.4547	26.2586	12.8815	13.3757	16.1351	22.7358	14.1307	-1.60896	1.8565e-05	0.0019344	Armadillo-type fold||-||Condensin-2 complex subunit G2
ENSG00000132436	FIGNL1	3.34359	3.27684	4.30803	1.86792	2.13205	2.79199	3.64282	2.26399	-1.60903	0.0018121	0.066579	ATPase, AAA-type, core||-||P-loop containing nucleoside triphosphate hydrolase||AAA+ ATPase domain||ATPase, AAA-type, conserved site||Vps4 oligomerisation, C-terminal
ENSG00000162062	C16orf59	4.72322	5.19292	6.31212	3.90952	3.22067	2.93724	5.40942	3.35581	-1.61196	0.0014011	0.055347	-
ENSG00000080823	MOK	8.19046	8.19377	10.7855	5.33773	4.11951	7.38552	9.05659	5.61426	-1.61314	0.011577	0.24449	Protein kinase, ATP binding site||Protein kinase-like domain||Protein kinase domain||Serine/threonine/dual specificity protein kinase, catalytic domain||-||Serine/threonine-protein kinase, active site
ENSG00000158023	WDR66	0.96755	1.10305	0.934975	0.582108	0.479052	0.801991	1.00186	0.62105	-1.61317	0.040538	0.53027	WD40 repeat||Quinonprotein alcohol dehydrogenase-like superfamily||WD40-repeat-containing domain
ENSG00000128342	LIF	28.3414	22.3095	28.6472	19.5521	12.4293	17.0416	26.4327	16.341	-1.61757	0.00063784	0.030615	Four-helical cytokine-like, core||Leukemia inhibitory factor /oncostatin, conserved site||-||Leukemia inhibitory factor||Leukemia inhibitory factor /oncostatin
ENSG00000054967	RELT	1.50681	2.16311	1.87958	0.8685	1.47514	1.08661	1.84983	1.14342	-1.61781	0.011699	0.24581	-||Tumour necrosis factor receptor 19-like||TNF receptor family, RELT
ENSG00000137804	NUSAP1	24.4135	27.2028	35.8764	15.7329	15.3885	22.959	29.1642	18.0268	-1.61782	0.012877	0.26088	-
ENSG00000170162	VGLL2	26.9921	27.3411	22.6219	17.9877	16.1936	13.3703	25.6517	15.8505	-1.61835	7.9022e-06	0.0009887	Vestigial/tondu
ENSG00000134222	PSRC1	13.8884	14.4368	14.5132	7.39496	9.16902	9.86888	14.2794	8.81095	-1.62065	1.1864e-06	0.00022035	-
ENSG00000184635	ZNF93	6.84091	5.66149	6.95666	3.95079	4.02918	4.01074	6.48635	3.9969	-1.62285	0.00090538	0.039814	Krueppel-associated box||Zinc finger, C2H2||-||Zinc finger, C2H2-like
ENSG00000232480	--	6.8317	4.71943	4.40716	4.11346	2.10413	3.6083	5.31943	3.2753	-1.62411	0.04009	0.52681	--
ENSG00000154928	EPHB1	7.44705	6.61886	6.02707	4.98669	3.53042	3.83947	6.69766	4.11886	-1.6261	0.00026026	0.01569	Protein kinase-like domain||Galactose-binding domain-like||Tyrosine-protein kinase, catalytic domain||Insulin-like growth factor binding protein, N-terminal||Protein kinase domain||Tyrosine-protein kinase, receptor class V, conserved site||Ephrin receptor type-A /type-B||Protein kinase, ATP binding site||Sterile alpha motif/pointed domain||Serine-threonine/tyrosine-protein kinase catalytic domain…
ENSG00000137812	CASC5	7.30774	6.6901	9.7288	4.26473	4.30674	6.00104	7.90888	4.8575	-1.62818	0.0063696	0.16392	-
ENSG00000068489	PRR11	22.9798	19.0533	24.0636	11.749	13.652	15.1866	22.0323	13.5292	-1.6285	1.2713e-06	0.00023323	-
ENSG00000159055	MIS18A	9.89716	10.5116	13.9504	6.30414	6.08623	8.69383	11.4531	7.02807	-1.62962	0.0048016	0.13469	Yippee/Mis18
ENSG00000142945	KIF2C	18.4583	16.0687	24.0796	9.21751	10.7554	15.9768	19.5355	11.9833	-1.63024	0.022041	0.36861	P-loop containing nucleoside triphosphate hydrolase||Kinesin motor domain||Kinesin motor domain, conserved site
ENSG00000159023	EPB41	1.04143	0.612327	0.916592	0.640044	0.446924	0.487718	0.856783	0.524895	-1.63229	0.026461	0.41559	Ezrin/radixin/moesin-like||Band 4.1, C-terminal||FERM, N-terminal||FERM adjacent (FA)||Band 4.1 domain||FERM conserved site||SAB domain||FERM, C-terminal PH-like domain||FERM central domain||FERM domain||Ubiquitin-related domain
ENSG00000187720	THSD4	1.76493	2.08807	2.07713	1.15074	0.961182	1.51094	1.97671	1.20762	-1.63686	0.00088772	0.039269	Thrombospondin type-1 (TSP1) repeat||ADAM-TS Spacer 1||PLAC
ENSG00000158246	FAM46B	1.9139	2.05264	1.35752	0.945065	1.01343	1.29241	1.77468	1.08363	-1.63771	0.0059355	0.15615	FAM46 family
ENSG00000168078	PBK	18.8046	17.834	23.3609	12.0053	9.51691	15.0145	19.9998	12.1789	-1.64217	0.00094069	0.041019	Protein kinase-like domain||Protein kinase domain||Serine/threonine/dual specificity protein kinase, catalytic domain||-||Serine/threonine-protein kinase, active site
ENSG00000155816	FMN2	10.2247	10.1277	11.4677	5.66621	5.87909	7.82202	10.6067	6.45577	-1.64298	4.2634e-07	9.1161e-05	Formin, FH2 domain||DEP domain||Formin Homology 1||-||Formin homology family, Cappuccino subfamily
ENSG00000131037	EPS8L1	6.09828	7.03497	5.18709	4.64438	2.91873	3.58329	6.10678	3.71546	-1.64361	0.0022187	0.076435	SH3 domain||-||PTB/PI domain||Tensin phosphotyrosine-binding domain
ENSG00000135476	ESPL1	6.61004	6.0528	8.42618	3.82403	3.54655	5.45881	7.02967	4.27646	-1.64381	0.0040454	0.11883	SEPARIN core domain||-||Peptidase C50, separase
ENSG00000111305	GSG1	30.1	30.0368	32.637	18.2443	17.6358	20.5002	30.9246	18.7935	-1.6455	1.118e-09	5.9701e-07	GSG1-like
ENSG00000139354	GAS2L3	9.70697	8.64854	11.5595	6.20448	4.99641	6.97596	9.97167	6.05895	-1.64578	0.00011345	0.0082539	Growth-arrest-specific protein 2 domain||-||Calponin homology domain
ENSG00000167601	AXL	71.9134	64.9448	78.6633	42.8359	38.8041	49.2246	71.8405	43.6215	-1.64691	1.2624e-09	6.5085e-07	Protein kinase-like domain||Serine-threonine/tyrosine-protein kinase catalytic domain||Protein kinase, ATP binding site||Tyrosine-protein kinase, active site||Fibronectin type III||Tyrosine-protein kinase, catalytic domain||Immunoglobulin subtype||Immunoglobulin V-set domain||Protein kinase domain||Immunoglobulin-like domain
ENSG00000133107	TRPC4	3.16354	2.61337	3.93144	1.7124	1.58503	2.59456	3.23612	1.964	-1.64772	0.014314	0.27792	Ankyrin repeat-containing domain||-||Ankyrin repeat||Transient receptor potential channel, canonical 4||Ion transport domain||Transient receptor potential channel, canonical||Transient receptor potential channel||Transient receptor ion channel domain
ENSG00000261801	--	10.4958	8.53874	11.9876	6.05882	5.75295	6.94148	10.3407	6.25109	-1.65423	9.0172e-05	0.0069495	--
ENSG00000140534	TICRR	1.69691	1.65768	2.04222	1.10291	1.0916	1.06692	1.79894	1.08714	-1.65474	8.8625e-05	0.006848	-
ENSG00000134057	CCNB1	54.3287	50.3443	75.1466	33.0018	30.9995	44.6475	59.9399	36.2163	-1.65505	0.0087336	0.20434	Cyclin, N-terminal||-||Cyclin-like||Cyclin, C-terminal domain
ENSG00000184792	OSBP2	15.8988	15.1857	17.8373	10.3673	8.07517	11.0529	16.3073	9.83179	-1.65863	1.8798e-08	6.316e-06	Oxysterol-binding protein, conserved site||Oxysterol-binding protein||-||Pleckstrin homology domain
ENSG00000277462	ZNF670	1.35086	1.36806	1.46558	0.748216	0.811674	0.962121	1.39483	0.84067	-1.65919	0.02308	0.37941	Zinc finger, C2H2||Krueppel-associated box||Zinc finger, C2H2-like
ENSG00000124479	NDP	3.28341	3.06368	3.903	1.73461	1.9566	2.47835	3.4167	2.05652	-1.6614	0.0072906	0.18016	Glycoprotein hormone subunit beta, cystine knot||Norrie disease protein||Cystine knot, C-terminal
ENSG00000144230	GPR17	1.30432	1.45255	1.49774	0.585177	1.05558	0.919688	1.4182	0.853482	-1.66167	0.035092	0.489	GPCR, rhodopsin-like, 7TM||G protein-coupled receptor, rhodopsin-like
ENSG00000165891	E2F7	5.46834	4.74224	6.24148	3.46256	2.9337	3.49768	5.48402	3.29798	-1.66284	7.8034e-06	0.00098458	E2F/DP family, winged-helix DNA-binding domain||-
ENSG00000088325	TPX2	22.1304	22.2641	27.6024	13.2046	13.1076	16.9282	23.999	14.4135	-1.66504	7.4912e-06	0.00096141	Aurora-A binding||TPX2, C-terminal||TPX2 central domain
ENSG00000091651	ORC6	13.3144	10.3244	17.4709	7.67533	7.52802	9.43223	13.7033	8.21186	-1.66872	0.012559	0.25763	Origin recognition complex, subunit 6||-
ENSG00000101057	MYBL2	12.017	12.5296	15.0493	6.6804	7.93699	9.09454	13.1986	7.90398	-1.66987	3.7355e-06	0.00055298	Myb-like domain||Homeodomain-like||C-myb, C-terminal||Myb domain||SANT/Myb domain
ENSG00000116106	EPHA4	9.55651	10.317	9.70347	6.29904	4.93922	6.46218	9.85899	5.90014	-1.67097	1.7089e-06	0.00029497	Protein kinase-like domain||Galactose-binding domain-like||Tyrosine-protein kinase, receptor class V, conserved site||Ephrin receptor type-A /type-B||Tyrosine-protein kinase, catalytic domain||Protein kinase domain||Ephrin receptor ligand binding domain||Sterile alpha motif/pointed domain||Serine-threonine/tyrosine-protein kinase catalytic domain||Protein kinase, ATP binding site||Ephrin receptor…
ENSG00000172935	MRGPRF	2.11229	2.732	3.21942	1.18005	2.02829	1.60819	2.6879	1.60551	-1.67418	0.010868	0.2352	GPCR, rhodopsin-like, 7TM||-||Mas-related G protein-coupled receptor family||G protein-coupled receptor, rhodopsin-like||Mas-related G protein-coupled receptor F
ENSG00000262814	MRPL12	1.78707	2.17674	2.80938	1.05788	1.45793	1.52737	2.25773	1.34773	-1.67521	0.048889	0.58926	Ribosomal protein L7/L12, oligomerisation||Ribosomal protein L7/L12, C-terminal||Ribosomal protein L7/L12, C-terminal/adaptor protein ClpS-like
ENSG00000076382	SPAG5	27.2607	26.2156	30.3465	15.216	16.343	18.4514	27.9409	16.6701	-1.67611	1.0341e-08	4.0159e-06	-
ENSG00000166851	PLK1	23.4558	22.3888	27.7793	12.5967	13.6996	17.6089	24.5413	14.6351	-1.67688	6.0454e-06	0.00080345	Protein kinase-like domain||Protein kinase, ATP binding site||Serine/threonine/dual specificity protein kinase, catalytic domain||Protein kinase domain||Serine/threonine-protein kinase, active site||-||POLO box duplicated domain
ENSG00000167670	CHAF1A	21.0254	23.332	28.5151	12.8687	13.9118	16.6585	24.2908	14.4797	-1.67758	7.5309e-05	0.0060536	-||Chromatin assembly factor 1 subunit A, N-terminal||Chromatin assembly factor 1 subunit A||Chromatin assembly factor 1 subunit A, C-terminal
ENSG00000100479	POLE2	3.86993	4.21885	5.80012	2.09183	2.4953	3.68611	4.62963	2.75775	-1.67877	0.022265	0.37085	DNA polymerase alpha/epsilon, subunit B||DNA polymerase epsilon, subunit B||DNA polymerase epsilon subunit B, N-terminal
ENSG00000112984	KIF20A	33.0681	31.1566	42.5728	18.806	19.6164	25.1444	35.5992	21.1889	-1.68008	0.00033964	0.019345	Kinesin motor domain, conserved site||-||Kinesin motor domain||P-loop containing nucleoside triphosphate hydrolase
ENSG00000142731	PLK4	6.6964	5.8728	8.90237	3.6421	3.69461	5.43316	7.15719	4.25662	-1.68143	0.009258	0.21312	Protein kinase domain||Protein kinase, ATP binding site||Protein kinase-like domain||Tyrosine-protein kinase, active site||POLO box duplicated domain
ENSG00000186185	KIF18B	8.84543	9.0839	10.4965	5.01642	4.901	6.93841	9.47527	5.61861	-1.68641	3.2886e-06	0.00049777	Kinesin motor domain, conserved site||Kinesin motor domain||P-loop containing nucleoside triphosphate hydrolase
ENSG00000142871	CYR61	344.79	316.624	410.507	218.341	174.634	242.008	357.307	211.661	-1.68811	1.1091e-05	0.0012659	Insulin-like growth factor binding protein, N-terminal||Thrombospondin type-1 (TSP1) repeat||IGFBP-related, CNN||Insulin-like growth factor binding protein, N-terminal, Cys-rich conserved site||VWFC domain||Insulin-like growth factor-binding protein, IGFBP||Glycoprotein hormone subunit beta, cystine knot||Cystine knot, C-terminal
ENSG00000238266	--	0.877397	0.66239	0.932873	0.520687	0.527192	0.416606	0.82422	0.488162	-1.68842	0.020179	0.3488	--
ENSG00000197943	PLCG2	2.35753	1.58688	1.79042	0.87053	1.06376	1.46144	1.91161	1.13191	-1.68883	0.015565	0.29458	Pleckstrin homology domain||SH2 domain||Phospholipase C, phosphatidylinositol-specific, Y domain||Phosphoinositide phospholipase C family||C2 domain||Phosphoinositide-specific phospholipase C, EF-hand-like domain||-||SH3 domain||Phosphatidylinositol-4, 5-bisphosphate phosphodiesterase gamma||PLC-like phosphodiesterase, TIM beta/alpha-barrel domain||Phosphatidylinositol-specific phospholipase C, X…
ENSG00000138675	FGF5	15.2325	13.6682	19.4333	9.69317	8.14225	10.7777	16.1113	9.53772	-1.68922	0.00041386	0.022218	Fibroblast growth factor family||IL-1 family/FGF family||Cytokine, IL-1-like||-
ENSG00000140525	FANCI	14.5677	14.7607	20.1591	8.29566	8.15422	12.8281	16.4958	9.75932	-1.69026	0.0067622	0.17021	FANCI helical domain 2||FANCI solenoid 2 domain||FANCI solenoid 4 domain||FANCI solenoid 3 domain||FANCI helical domain 1||FANCI solenoid 1 cap||FANCI solenoid 1 domain||-
ENSG00000176208	ATAD5	1.00879	1.00619	1.36613	0.552223	0.65224	0.795711	1.12704	0.666725	-1.69041	0.0024721	0.08312	P-loop containing nucleoside triphosphate hydrolase||AAA+ ATPase domain||ATPase, AAA-type, core||-
ENSG00000165244	ZNF367	4.37408	3.90421	5.81909	2.46981	2.5869	3.28239	4.69913	2.7797	-1.69052	0.0024666	0.08306	Zinc finger, C2H2||Zinc finger, C2H2-like
ENSG00000164430	MB21D1	4.7339	3.66934	5.67707	2.89614	2.4436	2.98849	4.69344	2.77608	-1.69067	0.001389	0.055017	Mab-21 domain
ENSG00000136982	DSCC1	4.64674	4.93027	6.70072	2.54236	2.95876	4.11676	5.42591	3.20596	-1.69245	0.0076806	0.18642	Sister chromatid cohesion protein Dcc1
ENSG00000237649	KIFC1	31.7511	29.0057	37.0906	17.1317	17.2845	23.3593	32.6158	19.2585	-1.69358	1.2986e-05	0.001449	P-loop containing nucleoside triphosphate hydrolase||-||Kinesin motor domain||Kinesin motor domain, conserved site
ENSG00000167642	SPINT2	4.5006	3.389	4.20951	2.5584	2.00976	2.57281	4.03304	2.38032	-1.69432	0.0029079	0.094005	-||Proteinase inhibitor I2, Kunitz, conserved site||Pancreatic trypsin inhibitor Kunitz domain
ENSG00000137807	KIF23	17.8552	18.5659	24.3794	10.7458	10.4866	14.6493	20.2668	11.9606	-1.69447	0.00086911	0.038502	Kinesin motor domain, conserved site||P-loop containing nucleoside triphosphate hydrolase||Kinesin motor domain||-
ENSG00000167900	TK1	43.1472	45.2088	54.761	23.7419	28.1603	32.5275	47.7056	28.1432	-1.6951	5.4018e-06	0.00073091	Thymidine kinase||Thymidine kinase, conserved site||P-loop containing nucleoside triphosphate hydrolase
ENSG00000169213	RAB3B	1.37148	1.30522	1.58814	0.813111	0.716956	0.985111	1.42162	0.838393	-1.69565	3.1552e-07	7.0033e-05	Small GTP-binding protein domain||Ran GTPase||P-loop containing nucleoside triphosphate hydrolase||Small GTPase superfamily, Rab type||Small GTPase superfamily||Small GTPase superfamily, Rho type||Small GTPase superfamily, Ras type
ENSG00000269825	--	0.735614	0.801099	1.14925	0.617402	0.54869	0.417003	0.89532	0.527698	-1.69665	0.02347	0.38435	--
ENSG00000092470	WDR76	6.64244	6.45221	7.82216	3.81488	3.68234	4.83069	6.97227	4.1093	-1.6967	1.8283e-06	0.00031063	WD40-repeat-containing domain||WD40 repeat||-
ENSG00000141052	MYOCD	2.86637	2.23993	2.95106	1.77861	1.23673	1.72974	2.68579	1.58169	-1.69804	8.7617e-05	0.0068202	SAP domain||-||RPEL repeat
ENSG00000157168	NRG1	7.49558	6.90406	9.86275	5.003	3.51787	5.75847	8.08746	4.75978	-1.69913	0.0036923	0.11251	Immunoglobulin subtype||Immunoglobulin subtype 2||Immunoglobulin I-set||EGF-like, conserved site||Immunoglobulin-like domain||-||Neuregulin-1||Neuregulin, C-terminal||EGF-like domain
ENSG00000051180	RAD51	6.49279	5.96945	9.06453	3.95969	3.38103	5.31309	7.17559	4.21794	-1.70121	0.010621	0.23216	DNA recombination and repair protein RecA, monomer-monomer interface||-||P-loop containing nucleoside triphosphate hydrolase||DNA recombination and repair protein Rad51, C-terminal||DNA recombination and repair protein RecA-like, ATP-binding domain||DNA recombination/repair protein Rad51||AAA+ ATPase domain||DNA repair Rad51/transcription factor NusA, alpha-helical||DNA recombination and repair p…
ENSG00000100162	CENPM	8.90985	10.7385	14.5525	6.1287	5.05987	8.90069	11.4003	6.69642	-1.70245	0.03097	0.45331	Centromere protein Cenp-M
ENSG00000138821	SLC39A8	3.55634	4.58732	5.33319	2.61292	2.1825	3.11891	4.49228	2.63811	-1.70284	0.0023217	0.079342	Zinc/iron permease
ENSG00000090889	KIF4A	8.72148	7.88438	10.1526	4.92502	4.58039	6.20564	8.91949	5.23702	-1.70316	4.1341e-06	0.00058947	Kinesin motor domain, conserved site||P-loop containing nucleoside triphosphate hydrolase||Kinesin motor domain
ENSG00000013810	TACC3	46.7024	43.7121	53.0522	25.0219	24.6135	34.5679	47.8222	28.0677	-1.70381	2.0007e-06	0.000338	-||Transforming acidic coiled-coil
ENSG00000120658	ENOX1	7.23985	6.59001	7.99929	4.71089	3.90277	4.19816	7.27638	4.27061	-1.70383	9.5057e-07	0.00018701	RNA recognition motif domain
ENSG00000180801	ARSJ	11.8109	11.4499	13.9901	6.15974	7.42149	8.22849	12.4169	7.26991	-1.70799	6.6064e-08	1.8292e-05	Sulfatase||Sulfatase, conserved site||Alkaline-phosphatase-like, core domain||-
ENSG00000117724	CENPF	32.6977	31.1422	40.0982	16.7736	18.1417	25.9063	34.646	20.2739	-1.7089	0.00030942	0.018143	Kinetochore protein Cenp-F/LEK1, Rb protein-binding domain||Centromere protein Cenp-F, N-terminal||Centromere protein Cenp-F, leucine-rich repeat-containing domain||-
ENSG00000115738	ID2	24.1712	26.8052	28.4704	14.5405	14.3369	17.5403	26.4823	15.4726	-1.71156	1.313e-09	6.6546e-07	Myc-type, basic helix-loop-helix (bHLH) domain
ENSG00000161800	RACGAP1	52.4769	50.4149	71.0749	29.3279	30.0292	42.2473	57.9889	33.8682	-1.7122	0.0022999	0.078687	-||Protein kinase C-like, phorbol ester/diacylglycerol-binding domain||Rho GTPase-activating protein domain||Rho GTPase activation protein
ENSG00000146670	CDCA5	22.4043	19.3631	26.8443	12.57	11.7678	15.7345	22.8706	13.3575	-1.7122	9.5539e-05	0.0072144	Sororin protein||-
ENSG00000169679	BUB1	16.505	14.8613	19.948	8.71736	8.48087	12.7629	17.1048	9.98705	-1.71269	0.00053548	0.026968	Serine/threonine/dual specificity protein kinase, catalytic domain||Protein kinase domain||Protein kinase-like domain||Protein kinase, ATP binding site||Serine/threonine-protein kinase, active site||Mad3/Bub1 homology region 1
ENSG00000186193	SAPCD2	2.80001	2.69389	3.22007	1.48164	1.46486	2.1367	2.90466	1.6944	-1.71427	1.4119e-05	0.0015637	Adenomatous polyposis coli domain
ENSG00000135451	TROAP	16.4204	16.0479	17.2503	7.66777	9.0032	12.3092	16.5729	9.66004	-1.71561	1.5013e-06	0.00026882	-
ENSG00000164109	MAD2L1	10.5594	10.4749	14.2661	5.99556	6.05436	8.51353	11.7668	6.85448	-1.71666	0.0012221	0.049909	-||HORMA domain
ENSG00000178999	AURKB	21.2203	22.1792	25.1309	13.6155	9.11877	17.1713	22.8435	13.3018	-1.71732	0.00041615	0.022301	Serine/threonine-protein kinase, active site||-||Protein kinase domain||Serine/threonine/dual specificity protein kinase, catalytic domain||Protein kinase, ATP binding site||Protein kinase-like domain
ENSG00000231274	SBK3	2.15	2.04062	1.93711	1.3397	1.33943	0.887455	2.04258	1.18886	-1.71809	0.038003	0.51007	Serine/threonine/dual specificity protein kinase, catalytic domain||Protein kinase domain||Protein kinase-like domain||Protein kinase, ATP binding site||Serine/threonine-protein kinase, active site||-
ENSG00000154319	FAM167A	13.3612	15.3154	21.8816	7.41883	8.77205	13.2285	16.8527	9.80645	-1.71853	0.035031	0.489	FAM167||-
ENSG00000165480	SKA3	6.21307	6.06941	7.59927	3.93939	3.52145	4.10489	6.62725	3.85524	-1.71902	1.663e-05	0.0017953	-
ENSG00000198901	PRC1	46.5211	43.5396	59.8311	25.784	26.9535	34.3449	49.9639	29.0275	-1.72126	0.0001859	0.012138	Microtubule-associated protein, MAP65/Ase1/PRC1
ENSG00000163535	SGOL2	20.8348	17.0674	21.8221	11.3623	10.1824	13.1161	19.9081	11.5536	-1.72311	2.0095e-07	4.8853e-05	-
ENSG00000167513	CDT1	7.67627	8.87207	9.29757	4.99424	3.97851	5.99993	8.6153	4.99089	-1.72621	3.1834e-06	0.00048567	CDT1 Geminin-binding domain-like
ENSG00000204362	--	0.978371	0.710671	1.14995	0.683708	0.393866	0.566577	0.94633	0.54805	-1.72672	0.010952	0.23629	--
ENSG00000100297	MCM5	31.5338	34.1075	41.0022	17.1585	19.4792	25.1165	35.5479	20.5848	-1.7269	4.7882e-05	0.0042149	MCM domain||Mini-chromosome maintenance protein||DNA replication licensing factor Mcm||MCM N-terminal domain||Nucleic acid-binding, OB-fold||Mini-chromosome maintenance, conserved site||-||P-loop containing nucleoside triphosphate hydrolase
ENSG00000185022	MAFF	10.8559	16.2018	16.581	5.72383	8.693	10.8173	14.5463	8.41136	-1.72936	0.015959	0.30013	Transcription factor, Skn-1-like, DNA-binding domain||Basic-leucine zipper domain||Basic leucine zipper domain, Maf-type
ENSG00000169933	FRMPD4	1.74865	1.84685	1.98369	0.910721	1.17193	1.1432	1.85973	1.07528	-1.72952	3.6769e-07	8.0255e-05	FERM domain||Ubiquitin-related domain||WW domain||Band 4.1 domain||FERM central domain||PDZ domain
ENSG00000143228	NUF2	15.9593	16.2546	21.1221	10.2347	7.51495	13.025	17.7786	10.2582	-1.73311	0.001512	0.058555	-||Kinetochore protein Nuf2
ENSG00000146263	MMS22L	2.60601	3.13935	3.75817	1.74876	1.5513	2.17222	3.16784	1.8241	-1.73667	0.000557	0.027569	-||Protein MMS22-like, N-terminal||Armadillo-type fold||MMS22-like, C-terminal
ENSG00000139304	PTPRQ	2.33368	2.76645	2.25872	1.44354	1.44527	1.34668	2.45295	1.41183	-1.73743	0.00024487	0.015071	Fibronectin type III||Protein-tyrosine phosphatase, catalytic||PTP type protein phosphatase||Protein-tyrosine phosphatase, active site||Tyrosine specific protein phosphatases domain||Protein-tyrosine phosphatase-like
ENSG00000184486	POU3F2	0.357825	0.334099	0.441427	0.326293	0.148096	0.177154	0.377784	0.217181	-1.73949	0.040627	0.53087	Lambda repressor-like, DNA-binding domain||POU domain||Homeobox domain||Homeodomain-like||POU-specific domain||POU-domain transcription factor, class 3||Homeobox, conserved site
ENSG00000142627	EPHA2	37.714	37.836	48.0901	25.659	20.2944	25.0957	41.2134	23.683	-1.74021	2.2199e-06	0.00036474	Insulin-like growth factor binding protein, N-terminal||Tyrosine-protein kinase, active site||Fibronectin type III||Tyrosine-protein kinase, catalytic domain||Protein kinase domain||Tyrosine-protein kinase, receptor class V, conserved site||Sterile alpha motif domain||Ephrin receptor type-A /type-B||Sterile alpha motif/pointed domain||Serine-threonine/tyrosine-protein kinase catalytic domain||Pro…
ENSG00000167771	RCOR2	1.95614	1.864	1.28928	1.30597	0.729537	0.895644	1.70314	0.977051	-1.74314	0.021592	0.36336	SANT domain||ELM2 domain||SANT/Myb domain||Homeodomain-like
ENSG00000071539	TRIP13	20.931	18.388	28.87	11.0788	12.4021	15.628	22.7297	13.0363	-1.74357	0.0053701	0.14532	ClpA/B family||ATPase, AAA-type, conserved site||ATPase, AAA-type, core||P-loop containing nucleoside triphosphate hydrolase||AAA+ ATPase domain
ENSG00000196172	ZNF681	1.14015	1.22537	1.46691	0.773135	0.634697	0.788167	1.27748	0.732	-1.74519	0.0081393	0.19502	Zinc finger, C2H2-like||Zinc finger, C2H2||Krueppel-associated box
ENSG00000050438	SLC4A8	2.28535	1.79081	1.65515	1.30144	0.849491	1.13184	1.91044	1.09426	-1.74587	0.00059431	0.028897	Sodium bicarbonate cotransporter||Band 3 cytoplasmic domain||Phosphotransferase/anion transporter||Bicarbonate transporter, eukaryotic||Bicarbonate transporter, C-terminal
ENSG00000138778	CENPE	6.83869	6.21755	7.78285	3.31204	3.65774	4.942	6.94636	3.97059	-1.74945	6.5424e-06	0.00086184	Kinesin motor domain, conserved site||P-loop containing nucleoside triphosphate hydrolase||Kinesin motor domain
ENSG00000147536	GINS4	5.44423	6.18328	7.01368	2.94836	2.86489	4.84185	6.21373	3.5517	-1.74951	0.0012586	0.050927	GINS complex, subunit Sld5||GINS complex||-
ENSG00000175063	UBE2C	44.1229	41.3801	53.9449	19.749	23.1188	36.7813	46.4826	26.5497	-1.75078	0.0027957	0.091367	-||Ubiquitin-conjugating enzyme, active site||Ubiquitin-conjugating enzyme E2||Ubiquitin-conjugating enzyme/RWD-like
ENSG00000138182	KIF20B	5.64963	4.36198	6.41885	2.61114	3.32098	3.43758	5.47682	3.12324	-1.75357	0.00023737	0.014744	P-loop containing nucleoside triphosphate hydrolase||Kinesin motor domain||Kinesin motor domain, conserved site
ENSG00000170312	CDK1	22.8506	20.5731	32.8051	13.2533	12.3437	17.8207	25.4096	14.4725	-1.75571	0.0096103	0.21854	Serine/threonine/dual specificity protein kinase, catalytic domain||Protein kinase domain||Protein kinase-like domain||Protein kinase, ATP binding site||Serine/threonine-protein kinase, active site
ENSG00000123485	HJURP	16.2527	15.2611	21.2434	9.22217	8.72919	12.0929	17.5857	10.0148	-1.75598	0.00034228	0.019385	-||Centromere protein Scm3/HJURP||Holliday junction recognition protein, HJURP||Holliday junction regulator protein family C-terminal
ENSG00000066279	ASPM	8.49955	7.03262	9.45663	3.90871	4.28896	6.02704	8.3296	4.74157	-1.75672	0.00016987	0.011288	Calmodulin-regulated spectrin-associated protein, CH domain||Armadillo-type fold||IQ motif, EF-hand binding site||P-loop containing nucleoside triphosphate hydrolase||Calponin homology domain
ENSG00000122952	ZWINT	27.1078	25.157	34.6157	13.1085	14.8317	21.4689	28.9602	16.4697	-1.75839	0.0013754	0.054692	-||ZW10 interactor
ENSG00000104889	RNASEH2A	18.0452	20.4617	22.1122	11.6495	10.398	12.4181	20.2064	11.4885	-1.75883	7.889e-09	3.1651e-06	Ribonuclease H-like domain||Ribonuclease H2, subunit A||Ribonuclease HII/HIII domain
ENSG00000132881	RSG1	2.58988	1.68666	3.04349	1.41561	1.48272	1.26209	2.44001	1.38681	-1.75944	0.019615	0.34241	P-loop containing nucleoside triphosphate hydrolase||Mitochondrial Rho-like
ENSG00000156802	ATAD2	12.9229	11.8654	16.0119	6.71614	6.9089	9.54682	13.6001	7.72395	-1.76077	0.00011686	0.0084404	ATPase, AAA-type, conserved site||Bromodomain||P-loop containing nucleoside triphosphate hydrolase||AAA+ ATPase domain||ATPase, AAA-type, core||-
ENSG00000092853	CLSPN	4.76473	4.33353	5.85823	2.37168	2.50251	3.61447	4.9855	2.82955	-1.76194	0.00034642	0.019545	-
ENSG00000109805	NCAPG	12.8071	11.5721	17.4181	6.5417	7.0224	10.1455	13.9324	7.90319	-1.76289	0.0051264	0.14077	Nuclear condensin complex subunit 3, C-terminal domain||-||Armadillo-type fold
ENSG00000113368	LMNB1	45.9464	46.3477	54.0098	24.4116	24.9532	33.2876	48.768	27.5508	-1.77011	1.3452e-08	4.8989e-06	-||Lamin Tail Domain||Intermediate filament protein||Intermediate filament protein, conserved site
ENSG00000116991	SIPA1L2	10.7035	14.5451	10.5906	6.46083	6.80512	6.9388	11.9464	6.73492	-1.7738	0.0001958	0.012646	Signal-induced proliferation-associated 1-like protein, C-terminal||PDZ domain||Rap GTPase activating protein domain
ENSG00000259363	--	3.23363	1.83389	2.65223	2.23881	1.03177	1.07477	2.57325	1.44845	-1.77655	0.049758	0.59445	--
ENSG00000178882	FAM101A	6.0909	6.9618	7.75489	3.86976	3.31272	4.52951	6.93586	3.904	-1.77661	1.0157e-05	0.0011818	FAM101 (Refilin) family
ENSG00000185697	MYBL1	17.0558	15.3233	20.9463	8.69185	9.0763	12.238	17.7751	10.002	-1.77715	8.194e-05	0.006448	Myb domain||SANT/Myb domain||Transcription regulator Wos2-domain||Homeodomain-like||Myb-like domain||C-myb, C-terminal
ENSG00000139734	DIAPH3	14.237	12.6671	16.615	7.9907	7.4374	9.05928	14.5064	8.16246	-1.77721	5.5332e-08	1.6222e-05	Diaphanous autoregulatory (DAD) domain||Rho GTPase-binding/formin homology 3 (GBD/FH3) domain||Formin, FH2 domain||Armadillo-type fold||DRF autoregulatory||Formin, FH3 domain||Formin, GTPase-binding domain
ENSG00000099337	KCNK6	43.4729	42.6227	50.491	27.4325	21.0816	28.3203	45.5289	25.6115	-1.77768	4.8022e-10	2.872e-07	Two pore domain potassium channel, TWIK family||Two pore domain potassium channel, TASK family||Potassium channel domain||Two pore domain potassium channel, TWIK-2||Two pore domain potassium channel
ENSG00000131470	PSMC3IP	4.7462	4.44166	6.05192	2.68407	3.07161	2.81226	5.07993	2.85598	-1.7787	0.00045226	0.023619	-||Tat binding protein 1-interacting
ENSG00000227741	--	1.43603	1.60299	2.18529	1.2156	0.707346	1.01313	1.74144	0.978692	-1.77935	0.013245	0.26586	--
ENSG00000080839	RBL1	5.27787	5.38862	6.37277	2.44839	3.06431	4.05551	5.67975	3.1894	-1.78082	2.0719e-05	0.0021074	Retinoblastoma-associated protein, A-box||Retinoblastoma-associated protein, N-terminal||-||Cyclin-like||Retinoblastoma-associated protein, B-box||Retinoblastoma-associated protein, C-terminal
ENSG00000131747	TOP2A	106.328	96.655	137.292	53.5112	55.2988	82.2146	113.425	63.6749	-1.78132	0.0013416	0.053707	Histidine kinase-like ATPase, C-terminal domain||DNA topoisomerase, type IIA, subunit B, domain 2||DTHCT||DNA topoisomerase II, eukaryotic-type||DNA topoisomerase, type IIA, conserved site||Toprim domain||DNA topoisomerase, type IIA, subunit A/C-terminal||DNA topoisomerase, type IIA||Ribosomal protein S5 domain 2-type fold||DNA topoisomerase, type IIA-like domain
ENSG00000216775	--	11.0456	11.0155	13.2162	5.94766	5.94061	7.91084	11.7591	6.5997	-1.78177	4.1158e-08	1.282e-05	--
ENSG00000124614	RPS10	3.06256	2.85609	4.35072	2.02059	1.4893	2.2454	3.42312	1.91843	-1.78434	0.019583	0.34206	Plectin/S10, N-terminal
ENSG00000139874	SSTR1	1.1448	1.58207	1.60577	0.731953	0.844615	0.85081	1.44421	0.809126	-1.78491	0.00022929	0.014344	Somatostatin receptor 1||G protein-coupled receptor, rhodopsin-like||GPCR, rhodopsin-like, 7TM||Somatostatin receptor family
ENSG00000174807	CD248	5.5325	7.0578	6.26059	2.70793	3.64355	4.19636	6.28363	3.51595	-1.78718	2.429e-05	0.0023893	EGF-like calcium-binding, conserved site||C-type lectin||EGF-like calcium-binding domain||EGF-type aspartate/asparagine hydroxylation site||EGF-like domain||Insulin-like growth factor binding protein, N-terminal||C-type lectin fold
ENSG00000117399	CDC20	41.9058	38.1527	50.7689	24.2701	20.9346	27.9515	43.6091	24.3854	-1.78833	2.5131e-06	0.00039973	WD40 repeat, conserved site||WD40-repeat-containing domain||WD40 repeat
ENSG00000175643	RMI2	2.04662	2.072	2.13646	1.2521	0.534295	1.70944	2.08502	1.16528	-1.78929	0.020362	0.35053	-
ENSG00000136068	FLNB	62.6155	54.9057	62.1714	36.477	29.1127	34.7694	59.8975	33.453	-1.7905	6.0214e-17	1.8006e-13	Immunoglobulin E-set||Filamin/ABP280 repeat||-||Calponin homology domain||Filamin/ABP280 repeat-like||Actinin-type actin-binding domain, conserved site
ENSG00000137310	TCF19	12.3531	12.3749	15.1951	6.5674	6.04325	9.66437	13.3077	7.42501	-1.79228	6.8159e-05	0.0055687	Zinc finger, PHD-type||Forkhead-associated (FHA) domain||Zinc finger, FYVE/PHD-type||Zinc finger, PHD-type, conserved site||-||SMAD/FHA domain||Zinc finger, PHD-finger
ENSG00000013619	MAMLD1	7.80683	6.97884	7.84143	4.7774	3.43331	4.40935	7.54237	4.20669	-1.79295	4.5466e-10	2.7747e-07	-
ENSG00000156970	BUB1B	14.4141	12.3345	20.3696	7.65194	7.33051	11.2795	15.7061	8.75397	-1.79416	0.013265	0.26586	Protein kinase domain||Protein kinase-like domain||-||Mad3/Bub1 homology region 1
ENSG00000100065	CARD10	21.9433	23.6892	27.4697	11.2747	13.5976	15.8455	24.3674	13.5726	-1.79534	1.3036e-07	3.2775e-05	-||CARD domain||Death-like domain
ENSG00000178752	FAM132B	8.13942	10.2504	11.9059	4.81526	4.91951	7.10544	10.0986	5.61341	-1.79901	0.0010316	0.04388	Tumour necrosis factor-like domain||C1q domain||-
ENSG00000122824	NUDT10	1.33134	1.114	1.07407	0.707185	0.71222	0.536289	1.17314	0.651898	-1.79957	0.011268	0.24006	NUDIX hydrolase, conserved site||NUDIX hydrolase domain||NUDIX hydrolase domain-like
ENSG00000143476	DTL	4.84459	4.74118	6.57443	2.67845	2.66745	3.6324	5.38673	2.99277	-1.79992	0.00038059	0.020882	WD40-repeat-containing domain||WD40 repeat||WD40 repeat, conserved site
ENSG00000154839	SKA1	5.58265	4.88617	8.49977	3.20785	2.57448	4.74992	6.32286	3.51075	-1.801	0.038841	0.51713	Protein of unknown function DUF1395
ENSG00000158402	CDC25C	4.36412	2.67802	5.01471	2.20702	1.77501	2.70283	4.01895	2.22829	-1.80361	0.019014	0.33547	M-phase inducer phosphatase||Rhodanese-like domain
ENSG00000148773	MKI67	15.904	16.9792	19.8906	8.45891	9.3016	11.4974	17.5913	9.75265	-1.80375	5.7219e-08	1.6612e-05	Forkhead-associated (FHA) domain||K167R||Protein phosphatase 1 binding domain||SMAD/FHA domain
ENSG00000138180	CEP55	31.4168	30.8855	39.3503	17.1367	16.886	22.3202	33.8842	18.781	-1.80418	1.5733e-06	0.00027839	TSG101 and ALIX binding domain of CEP55
ENSG00000101447	FAM83D	6.37802	6.55848	7.17309	3.28069	3.27478	4.56778	6.70319	3.70775	-1.80789	4.0609e-08	1.2782e-05	Protein of unknown function DUF1669
ENSG00000138160	KIF11	7.23152	6.14368	8.82724	3.50839	3.84696	4.91554	7.40081	4.09029	-1.80936	0.00014389	0.009869	Kinesin-associated microtubule-binding domain||Kinesin motor domain, conserved site||Kinesin motor domain||P-loop containing nucleoside triphosphate hydrolase
ENSG00000094796	KRT31	1.92883	2.33076	1.72119	1.4022	1.3288	0.572404	1.99359	1.10114	-1.81049	0.0060258	0.1582	Keratin, type I||Intermediate filament protein||Intermediate filament protein, conserved site
ENSG00000168000	BSCL2	1.80446	2.09325	1.23336	0.999459	0.915984	0.910344	1.71036	0.941929	-1.8158	0.041786	0.53894	-||Adipose-regulatory protein, Seipin
ENSG00000186871	ERCC6L	1.11519	1.21282	1.63337	0.570808	0.610864	0.999934	1.32046	0.727202	-1.81581	0.0071006	0.17709	Helicase superfamily 1/2, ATP-binding domain||P-loop containing nucleoside triphosphate hydrolase||Helicase, C-terminal||Tetratricopeptide repeat-containing domain||SNF2-related, N-terminal domain
ENSG00000011426	ANLN	78.2768	72.0024	105.859	42.8359	41.7863	56.3924	85.3794	47.0049	-1.8164	0.00071211	0.033257	-||Pleckstrin homology domain||Anillin homology domain
ENSG00000127564	PKMYT1	11.6015	13.3744	14.9206	5.85535	6.79339	9.30546	13.2988	7.31807	-1.81726	2.8032e-05	0.0027127	Serine/threonine-protein kinase, active site||-||Tyrosine/threonine-protein kinase, Cdc2 inhibitor||Serine/threonine/dual specificity protein kinase, catalytic domain||Protein kinase domain||Protein kinase-like domain||Protein kinase, ATP binding site
ENSG00000164045	CDC25A	5.78434	5.28132	7.51638	2.49425	3.04312	4.67587	6.19401	3.40441	-1.81941	0.0040421	0.11883	Rhodanese-like domain||M-phase inducer phosphatase
ENSG00000225206	--	1.60525	1.53702	1.74158	1.04789	0.764971	0.871091	1.62795	0.894651	-1.81965	0.007498	0.18393	--
ENSG00000081923	ATP8B1	21.5354	21.8216	28.451	12.8186	10.3055	16.0773	23.936	13.0671	-1.83177	9.9901e-05	0.0074127	HAD-like domain||P-type ATPase||P-type ATPase, phosphorylation site||P-type ATPase, cytoplasmic domain N||P-type ATPase, A domain||-||P-type ATPase, subfamily IV
ENSG00000024526	DEPDC1	9.13299	7.79069	12.7223	4.45534	5.0444	6.68004	9.88199	5.39326	-1.83229	0.0061221	0.15975	-||Rho GTPase activation protein||DEP domain||Rho GTPase-activating protein domain
ENSG00000109861	CTSC	96.1462	89.0372	108.08	52.3841	47.6125	59.867	97.7545	53.2879	-1.83446	1.3088e-13	1.5655e-10	Peptidase C1A, papain C-terminal||Cysteine peptidase, asparagine active site||Cathepsin C exclusion||Cysteine peptidase, cysteine active site||-||Cysteine peptidase, histidine active site
ENSG00000101412	E2F1	10.2662	12.1272	15.2248	5.68387	5.88643	8.88738	12.5394	6.81923	-1.83883	0.0017735	0.065553	E2F/DP family, winged-helix DNA-binding domain
ENSG00000214826	--	1.08812	1.19494	1.46763	0.596661	0.606008	0.836988	1.25023	0.679886	-1.83888	0.0027008	0.088945	--
ENSG00000187741	FANCA	9.79409	10.7684	14.7328	4.9019	6.0071	8.27832	11.7651	6.39578	-1.83951	0.0039425	0.11696	Fanconi anaemia group A protein||-
ENSG00000168497	SDPR	168.851	149.502	191.524	89.1581	80.5082	107.454	169.959	92.3735	-1.83991	1.3597e-08	4.8989e-06	Cavin family
ENSG00000118193	KIF14	2.26019	2.04552	3.37133	1.26111	1.19434	1.71551	2.55901	1.39032	-1.84059	0.0097985	0.2208	Kinesin motor domain, conserved site||Forkhead-associated (FHA) domain||P-loop containing nucleoside triphosphate hydrolase||SMAD/FHA domain||Kinesin motor domain
ENSG00000183856	IQGAP3	11.5117	11.893	14.7183	6.34611	6.32874	8.01569	12.7076	6.89684	-1.84253	1.5155e-07	3.7765e-05	Calponin homology domain||-||Ras GTPase-activating protein, conserved site||IQ motif, EF-hand binding site||Rho GTPase activation protein||RasGAP protein, C-terminal||Ras GTPase-activating protein
ENSG00000188783	PRELP	0.996914	1.06153	0.955986	0.41722	0.582665	0.63585	1.00481	0.545245	-1.84286	0.00011906	0.0085786	Leucine-rich repeat||Leucine-rich repeat N-terminal domain||Leucine-rich repeat, typical subtype
ENSG00000267774	--	3.63878	2.20234	3.35221	1.72519	1.34232	1.90148	3.06444	1.65633	-1.85014	0.0028123	0.091535	--
ENSG00000154146	NRGN	2.55258	2.1797	3.00476	1.01619	1.34202	1.81802	2.57901	1.39208	-1.85263	0.0047503	0.13388	IQ motif, EF-hand binding site
ENSG00000138166	DUSP5	23.6068	25.9746	36.5989	12.4055	14.25	19.8082	28.7267	15.4879	-1.85479	0.0047728	0.1342	Dual specificity protein phosphatase domain||Mitogen-activated protein (MAP) kinase phosphatase||Protein-tyrosine phosphatase, active site||Tyrosine specific protein phosphatases domain||Dual specificity phosphatase, catalytic domain||Protein-tyrosine phosphatase-like||Rhodanese-like domain||Protein-tyrosine phosphatase, catalytic
ENSG00000169908	TM4SF1	20.0759	22.6244	32.7832	11.2603	11.1823	18.2489	25.1612	13.5638	-1.85502	0.014556	0.28029	-||L6 membrane
ENSG00000119969	HELLS	5.28788	5.25104	6.30039	2.84624	2.47088	3.75886	5.6131	3.02533	-1.85537	4.9272e-07	0.00010303	Helicase, C-terminal||-||Helicase superfamily 1/2, ATP-binding domain||P-loop containing nucleoside triphosphate hydrolase||SNF2-related, N-terminal domain
ENSG00000204922	UQCC3	0.625792	0.725946	1.10382	0.402521	0.421602	0.49603	0.81852	0.440051	-1.86006	0.037232	0.50481	Protein of unknown function DUF4574
ENSG00000028137	TNFRSF1B	2.51382	2.19313	3.77721	1.19099	1.73558	1.62025	2.82805	1.5156	-1.86596	0.011351	0.24141	Tumour necrosis factor receptor 1B||TNFR/NGFR cysteine-rich region
ENSG00000126787	DLGAP5	17.9105	16.9663	25.1252	8.38243	9.29026	14.4832	20.0007	10.7186	-1.86597	0.0046782	0.13222	-||SAPAP family
ENSG00000051341	POLQ	2.59851	2.34567	3.2491	1.27103	1.14606	1.97075	2.73109	1.46261	-1.86727	0.0007528	0.034686	P-loop containing nucleoside triphosphate hydrolase||Helicase, C-terminal||DNA-directed DNA polymerase, family A, palm domain||DEAD/DEAH box helicase domain||Ribonuclease H-like domain||DNA polymerase A||Helicase superfamily 1/2, ATP-binding domain||DNA-directed DNA polymerase, family A, conserved site
ENSG00000152229	PSTPIP2	4.77313	5.23502	8.02761	2.99225	2.79426	3.86315	6.01192	3.21655	-1.86906	0.011295	0.24039	FCH domain
ENSG00000113070	HBEGF	2.33101	2.52618	3.0188	1.41427	1.16103	1.63837	2.62533	1.40456	-1.86915	0.0019882	0.070485	EGF-like domain||EGF-like, conserved site
ENSG00000152253	SPC25	7.60456	8.45148	12.2856	4.7054	3.74841	6.70396	9.44721	5.05259	-1.86978	0.012868	0.26087	Chromosome segregation protein Spc25||-
ENSG00000232439	--	2.52944	3.78614	2.4539	1.72867	1.38459	1.56909	2.92316	1.56078	-1.87288	0.034668	0.48739	--
ENSG00000149548	CCDC15	2.07279	2.05811	2.35326	1.07268	1.21525	1.16353	2.16139	1.15048	-1.87868	0.00015004	0.010197	-
ENSG00000111247	RAD51AP1	7.15172	7.35457	8.29678	3.32421	3.02765	5.78201	7.60102	4.04462	-1.87929	0.00025848	0.015615	-
ENSG00000175305	CCNE2	2.63692	3.67801	3.81925	1.29101	1.88491	2.21346	3.37806	1.79646	-1.8804	0.0010848	0.045625	Cyclin, C-terminal domain||-||Cyclin-like||Cyclin, N-terminal
ENSG00000113389	NPR3	1.79634	1.70345	1.65656	1.0838	0.744376	0.913862	1.71878	0.914011	-1.88048	0.0001365	0.0094702	Receptor, ligand binding region||Natriuretic peptide receptor||Periplasmic binding protein-like I
ENSG00000134690	CDCA8	10.8054	10.747	15.2855	5.80627	5.52014	8.23197	12.2793	6.51946	-1.88349	0.00093429	0.040905	Cell division protein borealin||Borealin, N-terminal
ENSG00000078401	EDN1	5.6573	3.39114	5.23238	2.93545	1.70201	2.94333	4.76027	2.52693	-1.88381	0.0060845	0.15944	Endothelin-like toxin||Endothelin-like toxin, conserved site||Bibrotoxin/Sarafotoxin-D
ENSG00000075218	GTSE1	18.9362	15.5782	22.3999	9.02712	7.89692	13.2454	18.9714	10.0565	-1.88649	0.00048465	0.024858	-
ENSG00000129195	FAM64A	22.501	19.6097	28.2088	10.391	11.5794	15.2531	23.4398	12.4078	-1.88912	0.00011988	0.0086172	Protein of unknown function DUF1466||-
ENSG00000131153	GINS2	9.83582	8.73213	13.4456	5.04485	5.89538	6.0046	10.6712	5.64828	-1.88928	0.00042838	0.022793	GINS complex||DNA replication complex GINS protein Psf2||-
ENSG00000103175	WFDC1	0.820472	0.909482	0.772652	0.386278	0.309392	0.623322	0.834202	0.439664	-1.89736	0.018824	0.33346	WAP-type 'four-disulfide core' domain||-
ENSG00000101003	GINS1	11.0476	10.1527	12.3563	5.18532	4.86929	7.62575	11.1855	5.89345	-1.89796	5.8776e-07	0.00012121	-
ENSG00000109625	CPZ	2.78646	2.71106	3.15378	1.53093	1.48617	1.53647	2.88377	1.51785	-1.8999	0.00057864	0.028459	-||Frizzled domain||Peptidase M14, carboxypeptidase A||Carboxypeptidase-like, regulatory domain
ENSG00000138829	FBN2	1.26051	0.765469	1.14489	0.442801	0.629431	0.596505	1.05696	0.556246	-1.90016	0.0016016	0.060777	TB domain||EGF-like calcium-binding domain||Fibrillin||EGF-like calcium-binding, conserved site||EGF-like domain||Insulin-like growth factor binding protein, N-terminal||EGF-like, conserved site||EGF-type aspartate/asparagine hydroxylation site
ENSG00000259494	MRPL46	2.23777	1.04941	1.8875	0.860371	0.683636	1.16992	1.72489	0.904643	-1.90671	0.034531	0.48592	NUDIX hydrolase domain-like||Ribosomal protein L46||-
ENSG00000087586	AURKA	20.4587	18.7061	26.0285	9.55702	10.0101	14.618	21.7311	11.395	-1.90706	0.00013461	0.0093832	Serine/threonine-protein kinase, active site||-||Protein kinase-like domain||Protein kinase, ATP binding site||Serine/threonine/dual specificity protein kinase, catalytic domain||Protein kinase domain
ENSG00000109674	NEIL3	1.75976	1.38614	2.07892	0.839326	0.822397	1.06767	1.74161	0.909799	-1.91428	0.0017331	0.064298	Zinc finger, RanBP2-type||DNA glycosylase/AP lyase, H2TH DNA-binding||DNA glycosylase/AP lyase, zinc finger domain, DNA-binding site||Formamidopyrimidine-DNA glycosylase, catalytic domain||Zinc finger, GRF-type||-||Zinc finger, DNA glycosylase/AP lyase-type||Ribosomal protein S13-like, H2TH
ENSG00000135604	STX11	1.02116	1.13309	1.63871	0.331985	0.724424	0.924941	1.26432	0.66045	-1.91433	0.029138	0.43697	Syntaxin/epimorphin, conserved site||Target SNARE coiled-coil homology domain||t-SNARE||Syntaxin, N-terminal domain
ENSG00000196584	XRCC2	1.21752	0.814341	1.73933	0.560449	0.658605	0.74997	1.25706	0.656341	-1.91526	0.031791	0.46125	DNA recombination and repair protein RecA-like, ATP-binding domain||DNA recombination and repair protein Rad51, C-terminal||P-loop containing nucleoside triphosphate hydrolase
ENSG00000147394	ZNF185	1.37799	1.42255	2.24665	0.945304	0.808596	0.877901	1.6824	0.877267	-1.91777	0.0051076	0.14054	Zinc finger, LIM-type||-
ENSG00000198754	OXCT2	0.749279	0.977845	0.960252	0.379347	0.519585	0.500305	0.895792	0.466412	-1.9206	0.027046	0.41852	3-oxoacid CoA-transferase||3-oxoacid CoA-transferase, subunit B||Coenzyme A transferase binding site||3-oxoacid CoA-transferase, subunit A||Coenzyme A transferase active site||Coenzyme A transferase family I
ENSG00000174371	EXO1	4.73959	3.84484	5.75412	2.14787	2.16316	3.15142	4.77952	2.48748	-1.92143	0.00034839	0.019549	XPG-I domain||5'-3' exonuclease, C-terminal domain||XPG conserved site||XPG/Rad2 endonuclease||XPG N-terminal||-||PIN domain-like||Helix-hairpin-helix motif, class 2
ENSG00000121152	NCAPH	8.40793	7.42236	9.18865	3.74223	3.43722	5.82386	8.33964	4.33444	-1.92404	8.8745e-06	0.0010701	Condensin complex subunit 2/barren
ENSG00000112742	TTK	8.82261	8.62256	11.4863	4.43024	4.17623	6.42183	9.64381	5.00943	-1.92513	5.9857e-05	0.0050136	Protein kinase-like domain||Protein kinase, ATP binding site||Serine/threonine/dual specificity protein kinase, catalytic domain||Protein kinase domain||Serine/threonine-protein kinase, active site||-
ENSG00000184661	CDCA2	5.35892	5.501	7.82636	2.57049	3.19559	3.93348	6.22876	3.23319	-1.92651	0.00079366	0.035904	Protein phosphatase 1 binding domain
ENSG00000080986	NDC80	19.5846	17.6825	25.0304	7.76318	10.2872	14.2176	20.7658	10.756	-1.93063	0.00056462	0.027861	Kinetochore protein Ndc80||-
ENSG00000123219	CENPK	10.7823	7.52641	14.229	4.94444	4.38678	7.48	10.8459	5.60374	-1.93547	0.018082	0.32476	-||Centromere protein Cenp-K
ENSG00000198873	GRK5	0.917505	1.28974	1.28375	0.538083	0.450873	0.807233	1.16366	0.59873	-1.94355	0.0010965	0.045859	GPCR kinase||RGS domain||Protein kinase domain||Serine/threonine/dual specificity protein kinase, catalytic domain||Protein kinase, ATP binding site||AGC-kinase, C-terminal||Protein kinase-like domain
ENSG00000146410	MTFR2	2.76776	2.30022	2.20236	0.720745	1.24021	1.76533	2.42345	1.2421	-1.9511	0.0047816	0.13426	-||Mitochondrial fission regulator 1
ENSG00000105011	ASF1B	16.321	16.1636	18.5726	6.54551	8.6689	10.9441	17.019	8.71951	-1.95183	1.262e-08	4.6589e-06	-||Histone chaperone, ASF1-like
ENSG00000128510	CPA4	14.9882	9.10526	13.857	7.17658	4.58215	7.66916	12.6501	6.47596	-1.9534	0.0024383	0.082201	Proteinase inhibitor, carboxypeptidase propeptide||Peptidase M14, carboxypeptidase A||Proteinase inhibitor, propeptide||-
ENSG00000143867	OSR1	3.20332	3.56023	4.27408	1.24305	1.60243	2.78698	3.67921	1.87749	-1.95965	0.0021633	0.075046	Zinc finger, C2H2||Zinc finger, C2H2-like
ENSG00000163545	NUAK2	0.720672	1.08105	0.88325	0.495518	0.210847	0.663729	0.89499	0.456698	-1.9597	0.017528	0.31843	Serine/threonine-protein kinase, active site||Protein kinase domain||Serine/threonine/dual specificity protein kinase, catalytic domain||Protein kinase, ATP binding site||Protein kinase-like domain
ENSG00000133106	EPSTI1	1.16079	1.50687	1.92684	0.378875	0.9019	1.06296	1.5315	0.781246	-1.96033	0.020894	0.35642	-
ENSG00000144554	FANCD2	5.38568	4.56459	7.24206	2.38338	2.46767	3.89847	5.73078	2.91651	-1.96495	0.0028604	0.092852	Fanconi anaemia protein FANCD2||-
ENSG00000144354	CDCA7	4.12257	3.32793	5.63558	1.72139	2.05264	2.88324	4.36203	2.21909	-1.96568	0.0054088	0.14591	-||Zinc-finger domain of monoamine-oxidase A repressor R1
ENSG00000231205	--	1.56604	1.81667	1.93882	0.920588	0.964229	0.820749	1.77384	0.901856	-1.96688	0.0037801	0.11441	--
ENSG00000120217	CD274	4.52765	3.83274	5.1522	2.01301	2.0126	2.82382	4.5042	2.28314	-1.97281	2.2999e-06	0.00037582	Immunoglobulin V-set domain||Immunoglobulin subtype||CD80-like, immunoglobulin C2-set||Immunoglobulin-like domain
ENSG00000164619	BMPER	2.20675	1.07997	1.55545	0.730502	1.12519	0.589392	1.61406	0.815029	-1.98037	0.023862	0.38787	Uncharacterised domain, cysteine-rich||-||von Willebrand factor, type D domain||Trypsin Inhibitor-like, cysteine rich domain||VWFC domain
ENSG00000232630	--	0.958239	1.64093	1.62181	0.625529	0.774306	0.731236	1.40699	0.710357	-1.98068	0.042383	0.54207	--
ENSG00000280670	CCDC163P	1.23711	0.805057	0.866192	0.488841	0.236314	0.741419	0.969453	0.488858	-1.9831	0.033639	0.47855	-
ENSG00000144583	43528	5.15338	4.95204	4.3898	2.73188	1.60639	2.9685	4.83174	2.43559	-1.98381	1.4231e-06	0.00025636	Zinc finger, RING-CH-type
ENSG00000171241	SHCBP1	32.4231	31.0909	44.4849	16.6758	15.1926	22.2891	35.9996	18.0525	-1.99416	0.00013305	0.0093178	Parallel beta-helix repeat||Pectin lyase fold/virulence factor
ENSG00000169607	CKAP2L	9.89843	10.2706	14.0198	5.00284	4.59397	7.51995	11.3963	5.70559	-1.99739	0.00040672	0.021914	Cytoskeleton-associated protein 2, C-terminal||-
ENSG00000127954	STEAP4	0.30665	0.294745	0.359308	0.196538	0.171546	0.112323	0.320234	0.160136	-1.99977	0.018262	0.327	Ferric reductase transmembrane component-like domain||Pyrroline-5-carboxylate reductase, catalytic, N-terminal
ENSG00000171848	RRM2	68.4814	69.1796	93.9435	31.9102	33.5407	50.3067	77.2015	38.5859	-2.00077	0.00014123	0.0097084	Ferritin-like superfamily||Ribonucleotide reductase small subunit, acitve site||Ribonucleotide reductase small subunit
ENSG00000181544	FANCB	0.671263	1.03826	1.04507	0.209138	0.584139	0.577696	0.918197	0.456991	-2.00922	0.014088	0.27609	-
ENSG00000075213	SEMA3A	2.26327	2.1056	3.06328	1.11706	0.96526	1.58005	2.47738	1.22079	-2.02933	0.00033342	0.019196	Plexin-like fold||Immunoglobulin subtype||Sema domain||-||Immunoglobulin-like domain
ENSG00000111788	--	1.31327	0.973751	1.88779	0.674904	0.600863	0.781065	1.3916	0.685611	-2.02973	0.010127	0.22633	--
ENSG00000171320	ESCO2	5.80256	5.6684	7.96693	3.10821	2.95658	3.50741	6.4793	3.19073	-2.03066	7.5799e-06	0.00096864	N-acetyltransferase ESCO, acetyl-transferase domain||-||N-acetyltransferase ESCO, zinc-finger
ENSG00000254726	MEX3A	8.11275	9.16271	8.90315	3.97194	3.9958	4.89886	8.7262	4.28887	-2.03462	1.4156e-15	3.0236e-12	K Homology domain||K Homology domain, type 1||Zinc finger, RING-type
ENSG00000117650	NEK2	6.94189	5.71023	10.568	2.67401	3.83047	4.88804	7.74003	3.79751	-2.03819	0.015234	0.29035	Serine/threonine-protein kinase, active site||Protein kinase-like domain||Protein kinase domain||Serine/threonine/dual specificity protein kinase, catalytic domain
ENSG00000085999	RAD54L	4.41756	3.93494	6.03884	1.37633	2.7287	2.94968	4.79711	2.35157	-2.03996	0.0026718	0.088184	Rad54, N-terminal||SNF2-related, N-terminal domain||Helicase superfamily 1/2, ATP-binding domain||P-loop containing nucleoside triphosphate hydrolase||Helicase, C-terminal||-
ENSG00000138379	MSTN	105.147	103.275	115.404	56.4558	46.653	55.3735	107.942	52.8274	-2.04329	1.0382e-30	1.5522e-26	Transforming growth factor beta, conserved site||Transforming growth factor-beta, C-terminal||Cystine-knot cytokine||Transforming growth factor-beta, N-terminal
ENSG00000085840	ORC1	1.91914	1.81283	2.2487	0.905429	0.769417	1.24483	1.99356	0.973225	-2.0484	8.219e-06	0.0010147	Bromo adjacent homology (BAH) domain||Cdc6, C-terminal domain||ATPase, AAA-type, core||AAA+ ATPase domain||P-loop containing nucleoside triphosphate hydrolase
ENSG00000158050	DUSP2	1.87556	2.01456	2.37398	0.735843	1.13342	1.1874	2.08803	1.01889	-2.04932	0.0027558	0.090357	Dual specificity protein phosphatase domain||Mitogen-activated protein (MAP) kinase phosphatase||Tyrosine specific protein phosphatases domain||Protein-tyrosine phosphatase, active site||Protein-tyrosine phosphatase-like||Dual specificity phosphatase, catalytic domain||Rhodanese-like domain||Protein-tyrosine phosphatase, catalytic
ENSG00000215126	CBWD7	1.14451	1.1064	1.49005	0.611285	0.426842	0.786043	1.24699	0.608057	-2.05078	0.010257	0.22791	-||P-loop containing nucleoside triphosphate hydrolase||CobW/HypB/UreG domain||Cobalamin (vitamin B12) biosynthesis CobW-like, C-terminal
ENSG00000136492	BRIP1	2.61938	3.1343	4.93405	1.4137	1.56148	2.2255	3.56258	1.73356	-2.05506	0.018039	0.32417	P-loop containing nucleoside triphosphate hydrolase||DEAD2||DNA helicase (DNA repair), Rad3 type||-||Helicase-like, DEXD box c2 type||Helicase superfamily 1/2, ATP-binding domain||Helicase superfamily 1/2, ATP-binding domain, DinG/Rad3-type||ATP-dependent helicase, C-terminal
ENSG00000047617	ANO2	1.94898	0.91849	1.41539	0.759027	0.834759	0.488011	1.42762	0.693932	-2.05729	0.01662	0.30844	-||Anoctamin
ENSG00000175592	FOSL1	33.3295	32.433	45.5617	15.3379	14.3935	24.283	37.1081	18.0048	-2.06101	0.0002809	0.016766	AP-1 transcription factor||Basic-leucine zipper domain||-
ENSG00000132016	C19orf57	2.08564	1.81458	2.32839	0.736441	1.17971	1.07696	2.0762	0.997704	-2.08098	0.0019707	0.070321	-
ENSG00000163082	SGPP2	0.358861	0.237882	0.367924	0.0798616	0.217483	0.164309	0.321556	0.153885	-2.08959	0.041973	0.54006	Phosphatidic acid phosphatase type 2/haloperoxidase
ENSG00000146592	CREB5	3.18131	3.7859	3.97397	1.50384	1.82571	1.90446	3.64706	1.74467	-2.0904	8.1112e-06	0.0010064	Transcription factor cyclic AMP-dependent, CRE-BP1-type||Zinc finger, C2H2||-||Basic-leucine zipper domain
ENSG00000102879	CORO1A	5.81001	5.53014	7.78959	2.45996	3.06272	3.62081	6.37658	3.04783	-2.09217	1.355e-05	0.0015063	WD40 repeat, conserved site||Domain of unknown function DUF1899||Trimerisation motif||WD40 repeat||WD40-repeat-containing domain
ENSG00000111331	OAS3	6.93743	7.69782	8.96811	2.41202	4.29809	4.53825	7.86779	3.74945	-2.09838	4.0225e-06	0.0005783	2-5-oligoadenylate synthetase, conserved site||2-5-oligoadenylate synthetase, N-terminal||Polymerase, nucleotidyl transferase domain||2'-5'-oligoadenylate synthetase 1, domain 2/C-terminal
ENSG00000197646	PDCD1LG2	2.78409	2.49565	4.52257	1.32928	1.36869	1.97004	3.26744	1.556	-2.09989	0.011637	0.24505	Immunoglobulin subtype||Immunoglobulin-like domain
ENSG00000134716	CYP2J2	0.626281	0.754456	0.493921	0.330209	0.251536	0.308808	0.624886	0.296851	-2.10505	0.035122	0.48918	Cytochrome P450||Cytochrome P450, E-class, group I, CYP2J-like||Cytochrome P450, E-class, group I||Cytochrome P450, conserved site
ENSG00000094804	CDC6	13.7112	14.2724	18.1158	6.86547	6.75148	8.23967	15.3665	7.28554	-2.10917	4.7236e-09	2.0574e-06	AAA+ ATPase domain||P-loop containing nucleoside triphosphate hydrolase||-||Cdc6, C-terminal domain||Cell division protein Cdc6/18
ENSG00000065328	MCM10	4.68973	5.22833	6.35539	2.35298	2.09352	3.23172	5.42448	2.55941	-2.11943	1.1071e-06	0.00020865	Zinc finger, Mcm10/DnaG-type||-||Replication factor Mcm10
ENSG00000280143	--	0.216749	0.214188	0.362141	0.140062	0.0943084	0.137222	0.264359	0.123864	-2.13427	0.023245	0.38192	--
ENSG00000119782	FKBP1B	0.866936	1.14282	1.29284	0.294656	0.360062	0.884087	1.10087	0.512935	-2.14621	0.04202	0.54006	FKBP-type peptidyl-prolyl cis-trans isomerase domain||-
ENSG00000183775	KCTD16	0.420617	0.158579	0.265931	0.131047	0.144122	0.117958	0.281709	0.131042	-2.14975	0.042207	0.54118	Potassium channel tetramerisation-type BTB domain||POZ domain||BTB/POZ domain
ENSG00000165490	DDIAS	4.03804	4.33987	6.53474	1.66511	2.09286	3.17207	4.97088	2.31002	-2.15188	0.0039788	0.11757	Nucleic acid-binding, OB-fold||Replication factor A, C-terminal||-
ENSG00000156475	PPP2R2B	0.828016	0.756784	1.2005	0.437777	0.524034	0.321675	0.928434	0.427828	-2.17011	0.010211	0.22752	Protein phosphatase 2A regulatory subunit PR55||WD40-repeat-containing domain||WD40 repeat||-||WD40 repeat, conserved site||Protein phosphatase 2A regulatory subunit PR55, conserved site
ENSG00000197106	SLC6A17	0.699505	0.427082	0.520054	0.229407	0.240282	0.288436	0.54888	0.252709	-2.17199	0.0038418	0.11561	Sodium:neurotransmitter symporter, orphan||Sodium:neurotransmitter symporter
ENSG00000211772	TRBC2	2.92589	1.4781	2.19339	0.940992	0.924	1.15959	2.19913	1.00819	-2.18125	0.0048518	0.13546	-
ENSG00000100228	RAB36	1.54335	0.923153	1.54937	0.751321	0.440685	0.644076	1.33862	0.612027	-2.1872	0.0015245	0.058594	Small GTPase superfamily||Small GTP-binding protein domain||Small GTPase superfamily, Ras type||Small GTPase superfamily, Rho type||Small GTPase superfamily, Rab type||P-loop containing nucleoside triphosphate hydrolase||Small GTPase superfamily, ARF type||Ran GTPase
ENSG00000106689	LHX2	1.10937	1.00866	0.819739	0.560487	0.391372	0.384386	0.979258	0.445415	-2.19853	0.011199	0.23926	Zinc finger, LIM-type||Homeodomain-like||Homeobox domain||Homeobox, conserved site
ENSG00000135842	FAM129A	0.938324	0.657206	1.45211	0.397145	0.415972	0.567427	1.01588	0.460181	-2.20756	0.023273	0.38218	-
ENSG00000179750	APOBEC3B	5.42614	5.43771	8.89332	2.30129	2.3733	4.2491	6.58572	2.97456	-2.21401	0.0073849	0.18175	APOBEC-like, N-terminal||-||Cytidine deaminase-like||APOBEC/CMP deaminase, zinc-binding
ENSG00000189057	FAM111B	4.55762	5.6554	7.22613	1.93209	2.80389	3.13299	5.81305	2.62299	-2.21619	0.00016663	0.011122	Peptidase S1, PA clan||-
ENSG00000197299	BLM	3.89422	3.18329	3.97188	1.33272	1.15886	2.45742	3.68313	1.64967	-2.23265	2.2022e-05	0.0022098	HRDC domain||RQC domain||Helicase superfamily 1/2, ATP-binding domain||DNA helicase, ATP-dependent, RecQ type||DEAD/DEAH box helicase domain||-||HRDC-like||Helicase, C-terminal||BDHCT||DNA/RNA helicase, ATP-dependent, DEAH-box type, conserved site||P-loop containing nucleoside triphosphate hydrolase
ENSG00000163661	PTX3	31.053	42.4655	64.8043	14.3372	17.6634	29.879	46.1076	20.6265	-2.23535	0.026121	0.41102	Concanavalin A-like lectin/glucanase domain||Pentaxin, conserved site||Pentaxin-related||LamG-like jellyroll fold
ENSG00000163131	CTSS	1.66914	1.00537	2.54501	0.560038	1.04748	0.720146	1.73984	0.775887	-2.24239	0.040908	0.53212	Cysteine peptidase, histidine active site||-||Cysteine peptidase, cysteine active site||Cysteine peptidase, asparagine active site||Peptidase C1A, papain C-terminal||Cathepsin propeptide inhibitor domain (I29)
ENSG00000188112	C6orf132	1.43241	1.27068	1.18474	0.645044	0.392804	0.694427	1.29595	0.577425	-2.24435	7.7414e-06	0.00098089	-
ENSG00000087303	NID2	78.4606	74.7045	78.3939	35.0017	28.5567	38.9611	77.1863	34.1732	-2.25868	4.1388e-36	1.2376e-31	Complement Clr-like EGF domain||EGF domain||Green fluorescent protein||G2 nidogen/fibulin G2F||EGF-like domain||EGF-like calcium-binding, conserved site||EGF-like calcium-binding domain||Thyroglobulin type-1||NIDO domain||Insulin-like growth factor binding protein, N-terminal||LDLR class B repeat||EGF-like, conserved site||EGF-type aspartate/asparagine hydroxylation site
ENSG00000181773	GPR3	1.03099	1.4305	1.29883	0.377898	0.606913	0.66951	1.25344	0.55144	-2.27303	0.00061828	0.029916	GPCR, rhodopsin-like, 7TM||G protein-coupled receptor 3/6/12 orphan||G protein-coupled receptor 3||G protein-coupled receptor, rhodopsin-like
ENSG00000105369	CD79A	1.85682	0.963628	1.46953	0.182687	0.637824	1.04407	1.42999	0.621525	-2.30078	0.030657	0.45143	Immunoglobulin-like domain||Immunoglobulin subtype||Immunoglobulin subtype 2||Immunoglobulin V-set domain||Phosphorylated immunoreceptor signalling ITAM
ENSG00000167641	PPP1R14A	57.1332	52.1476	63.082	26.4462	21.4715	26.964	57.4542	24.9606	-2.3018	1.2961e-23	9.6891e-20	PKC-activated phosphatase-1 inhibitor
ENSG00000267745	--	0.811371	0.777534	1.10915	0.527561	0.18419	0.452256	0.899351	0.388002	-2.3179	0.027678	0.42291	--
ENSG00000221852	KRTAP1-5	0.581216	0.927074	1.39042	0.452707	0.284501	0.504513	0.966237	0.413907	-2.33443	0.035078	0.489	Keratin-associated protein
ENSG00000159958	TNFRSF13C	0.184292	0.163484	0.296386	0.0810603	0.113204	0.0810712	0.214721	0.0917785	-2.33955	0.047922	0.58326	Tumour necrosis factor receptor 13C, TALL-1 binding domain||Tumour necrosis factor receptor 13C
ENSG00000090530	P3H2	2.58105	2.95074	2.86356	0.932348	1.51365	1.11897	2.79845	1.18832	-2.35496	6.5714e-05	0.0054133	Tetratricopeptide repeat 2||Prolyl 4-hydroxylase, alpha subunit||-||Oxoglutarate/iron-dependent dioxygenase
ENSG00000237781	--	1.35018	1.34252	0.439454	0.480755	0.503545	0.343442	1.04405	0.442581	-2.359	0.048447	0.58697	--
ENSG00000164220	F2RL2	0.745739	0.432545	0.752437	0.287661	0.185414	0.341446	0.643574	0.271507	-2.37038	0.0058589	0.15463	GPCR, rhodopsin-like, 7TM||Protease-activated receptor 3||G protein-coupled receptor, rhodopsin-like||Protease-activated receptor
ENSG00000139292	LGR5	0.409309	0.435248	0.373019	0.233793	0.111308	0.163981	0.405858	0.169694	-2.39171	0.021983	0.36786	Leucine-rich repeat||GPCR, rhodopsin-like, 7TM||G protein-coupled receptor, rhodopsin-like||Leucine rich repeat 5||Leucine-rich repeat N-terminal domain||Glycoprotein hormone receptor family||Leucine-rich repeat, typical subtype
ENSG00000168685	IL7R	9.69129	9.30247	15.8457	4.6416	4.76242	5.11592	11.6132	4.83998	-2.39942	0.0010236	0.043665	-||Fibronectin type III||Short hematopoietin receptor, family 1, conserved site
ENSG00000158270	COLEC12	0.199082	0.285283	0.304163	0.0875656	0.137575	0.100088	0.262843	0.10841	-2.42453	0.027433	0.42033	C-type lectin fold||Collagen triple helix repeat||C-type lectin, conserved site||C-type lectin
ENSG00000274276	CBSL	0.741857	0.659783	0.473258	0.277359	0.193671	0.290605	0.624966	0.253878	-2.46168	0.013838	0.27368	CBS domain||Tryptophan synthase beta subunit-like PLP-dependent enzyme||Cystathionine beta-synthase||Cysteine synthase/cystathionine beta-synthase, pyridoxal-phosphate attachment site
ENSG00000138741	TRPC3	0.264639	0.306993	0.316543	0.185514	0.0863591	0.0883517	0.296058	0.120075	-2.46561	0.043369	0.55045	Transient receptor ion channel domain||Transient receptor potential channel||Transient receptor potential channel, canonical||Ion transport domain||Transient receptor potential channel, canonical 3||Ankyrin repeat||Ankyrin repeat-containing domain||-
ENSG00000171873	ADRA1D	3.72133	4.37814	3.93257	2.10503	0.96461	1.80456	4.01068	1.62473	-2.46852	1.3795e-08	4.9108e-06	G protein-coupled receptor, rhodopsin-like||Alpha 1D adrenoceptor||Adrenoceptor family||GPCR, rhodopsin-like, 7TM
ENSG00000082482	KCNK2	2.28772	2.40282	2.0708	0.693497	0.928142	1.0569	2.25378	0.892846	-2.52427	2.7912e-05	0.0027099	Potassium channel domain||Two pore domain potassium channel, TREK||Two pore domain potassium channel||-
ENSG00000146678	IGFBP1	1.05433	1.67367	1.66884	0.484083	0.470814	0.770684	1.46561	0.575194	-2.54803	0.00053569	0.026968	Insulin-like growth factor-binding protein family 1-6, chordata||Insulin-like growth factor binding protein, N-terminal, Cys-rich conserved site||Insulin-like growth factor binding protein, N-terminal||Insulin-like growth factor-binding protein 1||Insulin-like growth factor-binding protein, IGFBP||Thyroglobulin type-1
ENSG00000137393	RNF144B	4.17129	3.53888	4.78728	1.70694	1.52374	1.6462	4.16582	1.62563	-2.56259	7.6416e-14	1.0387e-10	IBR domain||Zinc finger, RING-type, conserved site||Zinc finger, RING-type
ENSG00000187800	PEAR1	1.03216	0.507349	0.62178	0.218018	0.251189	0.373796	0.720428	0.281001	-2.56379	0.0075308	0.18409	EMI domain||-||EGF-like domain||EGF-like, conserved site||Laminin EGF domain
ENSG00000203786	KPRP	0.634816	0.636899	0.633258	0.149673	0.335933	0.238287	0.634991	0.241298	-2.63157	0.0016532	0.062263	-
ENSG00000213967	ZNF726	0.472439	0.456708	0.968741	0.196257	0.23982	0.280404	0.632629	0.238827	-2.6489	0.025313	0.40283	Zinc finger, C2H2-like||Zinc finger, C2H2||Krueppel-associated box
ENSG00000104490	NCALD	0.865	0.716741	1.06985	0.410664	0.322599	0.264034	0.883862	0.332432	-2.65877	0.01767	0.31985	EF-Hand 1, calcium-binding site||-||EF-hand domain pair||EF-hand domain
ENSG00000226835	--	1.51426	1.34329	2.07001	0.999069	0.46508	0.380649	1.64252	0.614932	-2.67106	0.028102	0.42741	--
ENSG00000112414	ADGRG6	7.18484	5.34828	7.31455	2.64217	2.28422	2.49871	6.61589	2.47503	-2.67305	3.1452e-12	2.6126e-09	-||GPS motif||CUB domain||Pentaxin-related||GPCR, family 2, secretin-like, conserved site||GPCR, family 2, secretin-like||GPCR, family 2-like||Concanavalin A-like lectin/glucanase domain
ENSG00000013297	CLDN11	7.20479	10.6795	14.0274	2.22204	4.13228	5.55909	10.6372	3.97114	-2.67863	0.0023988	0.081328	Claudin, conserved site||PMP-22/EMP/MP20/Claudin superfamily||Claudin-11
ENSG00000254996	ANKHD1-EIF4EBP3	0.0885378	0.130719	0.143038	0.0401232	0.0840506	0.00859899	0.120765	0.0442576	-2.72868	0.039516	0.5229	Ankyrin repeat-containing domain||-||Ankyrin repeat||K Homology domain, type 1||K Homology domain
ENSG00000117115	PADI2	9.87331	13.1798	11.7169	4.01232	4.91229	3.60776	11.59	4.17746	-2.77441	6.1578e-13	5.9399e-10	Cupredoxin||Protein-arginine deiminase (PAD), central domain||Protein-arginine deiminase (PAD) N-terminal||Protein-arginine deiminase||Protein-arginine deiminase, C-terminal
ENSG00000236618	--	0.867736	1.8302	1.83322	0.294928	0.308909	1.01132	1.51039	0.538385	-2.8054	0.031756	0.46097	--
ENSG00000169903	TM4SF4	0.6028	0.499481	1.00061	0.160978	0.168609	0.413999	0.700963	0.247862	-2.82804	0.044031	0.55626	L6 membrane
ENSG00000166831	RBPMS2	0.797256	0.898428	0.903023	0.198714	0.237867	0.462376	0.866235	0.299652	-2.8908	0.0009545	0.041303	-||RNA recognition motif domain
ENSG00000167895	TMC8	0.461393	0.356824	0.714824	0.306669	0.120452	0.0985853	0.511013	0.175235	-2.91615	0.027131	0.41928	TMC||-
ENSG00000154645	CHODL	0.219567	0.347328	0.218291	0.17413	0.0260549	0.0639746	0.261729	0.088053	-2.9724	0.045587	0.56775	C-type lectin||C-type lectin fold
ENSG00000013588	GPRC5A	10.5196	12.8144	10.3929	3.33023	3.68461	3.84	11.2423	3.61828	-3.10708	4.2204e-20	2.1034e-16	-||GPCR, family 3, C-terminal
ENSG00000026751	SLAMF7	2.24829	0.729389	2.68274	0.379919	0.522282	0.916	1.88681	0.606067	-3.1132	0.034372	0.48528	Immunoglobulin V-set domain||Immunoglobulin-like domain
ENSG00000131737	KRT34	2.49062	2.6343	2.80387	0.76076	0.764952	0.939122	2.64293	0.821611	-3.21677	1.6174e-09	7.9288e-07	Intermediate filament protein||Intermediate filament protein, conserved site||Keratin, type I
ENSG00000161798	AQP5	2.10397	1.43827	2.25983	0.374578	0.735627	0.682358	1.93402	0.597521	-3.23674	1.9295e-05	0.0020034	Aquaporin-like||Major intrinsic protein||Major intrinsic protein, conserved site||Aquaporin 5
ENSG00000135116	HRK	1.44171	1.8815	1.38574	0.449177	0.470471	0.529459	1.56965	0.483036	-3.24955	6.1656e-07	0.00012628	Activator of apoptosis harakiri||Apoptosis regulator, Bcl-2, BH3 motif, conserved site||-
ENSG00000278206	--	0.370179	0.166998	0.168679	0.0256295	0.134222	0.0439421	0.235286	0.0679313	-3.46358	0.029442	0.44065	--
ENSG00000066336	SPI1	0.86948	0.613951	1.86039	0.329784	0.345417	0.28271	1.11461	0.319304	-3.49075	0.033759	0.47979	-||Ets domain
ENSG00000138061	CYP1B1	3.9999	5.76872	4.76594	1.54934	1.34056	1.15494	4.84485	1.34828	-3.59336	1.2618e-11	9.4329e-09	Cytochrome P450||Cytochrome P450, E-class, group I||Cytochrome P450, conserved site
ENSG00000269896	--	0.42397	0.378326	0.624152	0.162574	0.0425702	0.17421	0.475482	0.126451	-3.7602	0.018113	0.32511	--
ENSG00000257642	--	1.47971	1.53584	1.80985	0.388223	0.30497	0.582413	1.60846	0.425202	-3.78282	0.0037258	0.1132	--
ENSG00000277382	--	1.94344	0.867106	2.45234	0.186307	0.585415	0.479138	1.75429	0.416953	-4.20741	0.022494	0.37328	--
ENSG00000133574	GIMAP4	0.533494	0.265233	0.937658	0.0474899	0.198965	0.162844	0.578795	0.136433	-4.24234	0.026683	0.41687	P-loop containing nucleoside triphosphate hydrolase||AIG1-type guanine nucleotide-binding (G) domain
ENSG00000197632	SERPINB2	1.59428	0.924718	3.12049	0.225778	0.520259	0.580651	1.87983	0.442229	-4.25081	0.022274	0.37085	Serpin, conserved site||Serpin domain
ENSG00000140968	IRF8	0.625693	0.435499	1.25448	0.155952	0.108897	0.267383	0.771891	0.17741	-4.35087	0.017952	0.32319	-||SMAD/FHA domain||Interferon regulatory factor DNA-binding domain||Interferon regulatory factor, conserved site||Interferon regulatory factor-3
ENSG00000263513	FAM72C	0.151309	0.376126	0.384133	0.0808145	0.0564303	0.0692788	0.303856	0.0688412	-4.41387	0.011382	0.2419	Protein FAM72
ENSG00000236519	--	0.414701	0.288643	0.28345	0.0516815	0.0541315	0.0886088	0.328931	0.0648073	-5.07553	0.043036	0.54826	--
ENSG00000238186	--	0.861379	0.999237	0.642279	0.195178	0.102215	0.167318	0.834298	0.154904	-5.38591	0.013838	0.27368	--
ENSG00000117090	SLAMF1	0.180078	0.119371	0.246168	0.0641199	0.0335798	0	0.181872	0.0325666	-5.58463	0.048643	0.588	Signaling lymphocytic activation molecule, N-terminal||Immunoglobulin-like domain
ENSG00000179362	--	0.222686	0.464986	0.243531	0.166511	0	0	0.310401	0.0555038	-5.59242	0.049366	0.59209	--
ENSG00000118432	CNR1	0.0812537	0.207367	0.222149	0.0405045	0.0424246	0	0.170257	0.027643	-6.15911	0.011136	0.23838	-||GPCR, rhodopsin-like, 7TM||Cannabinoid receptor type 1||Cannabinoid receptor family||G protein-coupled receptor, rhodopsin-like
ENSG00000188487	INSC	0.169666	0.0492048	0.231934	0.0264304	0	0.0453153	0.150268	0.0239152	-6.28336	0.049975	0.59538	Armadillo||Armadillo-type fold
ENSG00000203711	--	0.895834	0.377893	0.66797	0.304478	0	0	0.647232	0.101493	-6.37713	0.023961	0.38857	--
ENSG00000266239	--	3.08149	1.3405	4.73898	0	0.502789	0.823024	3.05366	0.441938	-6.9097	0.029637	0.44311	--
ENSG00000251230	--	0.654758	0.227864	1.07407	0	0	0.279803	0.652231	0.0932677	-6.99311	0.035653	0.49193	--
ENSG00000143105	KCNA10	0.403864	0.156167	0.184028	0	0.0702892	0.0287644	0.24802	0.0330178	-7.51168	0.0089244	0.20742	Ion transport domain||Potassium channel||Potassium channel tetramerisation-type BTB domain||BTB/POZ domain||POZ domain||Potassium channel, voltage dependent, Kv||Potassium channel, voltage dependent, Kv1
ENSG00000254337	--	0.747187	0.674154	0.90792	0.206927	0	0.0886949	0.776421	0.0985406	-7.8792	0.010529	0.23141	--
ENSG00000225980	--	1.23459	0.301511	0.888258	0.0809782	0.084817	0.138838	0.808119	0.101545	-7.95827	0.0055406	0.14857	--
ENSG00000221539	--	5.20002	2.01075	7.89829	0	0	1.8518	5.03635	0.617268	-8.1591	0.017933	0.32313	--
ENSG00000269729	--	0.632748	0.734016	0.247135	0	0	0.193141	0.537966	0.0643803	-8.35606	0.0484	0.58697	--
ENSG00000182747	SLC35D3	0.235619	0.168202	0.148658	0	0.0236582	0.0387265	0.184159	0.0207949	-8.856	0.0051088	0.14054	Sugar phosphate transporter domain
ENSG00000100055	CYTH4	0.255149	0.338268	0.5481	0	0.0475785	0.0778821	0.380505	0.0418202	-9.09861	0.0058295	0.15439	Sec7 domain||Pleckstrin homology domain
ENSG00000047365	ARAP2	0.150548	0.124745	0.411601	0	0.0280732	0.0459536	0.228965	0.0246756	-9.27899	0.021091	0.35827	Ras-associating (RA) domain||Pleckstrin homology domain||Sterile alpha motif/pointed domain||Arf GTPase activating protein||Sterile alpha motif domain||-||Rho GTPase-activating protein domain||Rho GTPase activation protein
ENSG00000100453	GZMB	0.516512	0.199725	0.627623	0	0.0749122	0.0613125	0.447953	0.0454083	-9.86502	0.014858	0.28462	Peptidase S1, trypsin family, active site||Serine proteases, trypsin domain||Peptidase S1A, chymotrypsin-type||-||Peptidase S1, PA clan
ENSG00000163564	PYHIN1	0.197812	0.0327816	0.193151	0	0.0368867	0	0.141248	0.0122956	-11.4877	0.049836	0.59514	HIN-200/IF120x||DAPIN domain
ENSG00000235244	--	0.0822621	0.166998	0.112453	0.0256295	0	0	0.120571	0.00854316	-14.1132	0.026555	0.41596	--
ENSG00000252192	--	1.6572	1.92242	1.81232	0	0	0.354092	1.79731	0.118031	-15.2275	0.037201	0.50481	--
